# Supplementary material
Source: PubMed Central journal article supplement (PMC3365512)
Supplement: NIHMS207362-supplement-1_si_001.pdf [file NIHMS207362-supplement-1_si_001.pdf]

# **CuH-Catalyzed Enantioselective 1,2-Reductions of $\alpha,\beta$ -Unsaturated Ketones**

## **Supporting Information**

Ralph Moser, Žarko V. Bošković, Christopher S. Crowe and Bruce H. Lipshutz\*

Department of Chemistry and Biochemistry  
University of California, Santa Barbara, CA 93106

[lipshutz@chem.uscb.edu](mailto:lipshutz@chem.uscb.edu)

### **Table of Contents**

|      |                                                                                          |         |
|------|------------------------------------------------------------------------------------------|---------|
| I.   | General Information                                                                      | S2      |
| II.  | Optimization conditions for regio- and stereocontrolled 1,2-reductions                   | S3-S9   |
| III. | Synthesis of $\alpha$ -substituted $\alpha,\beta$ -unsaturated ketones                   | S10-S13 |
| IV.  | Addition to Table 2                                                                      | S14     |
| V.   | CuH catalyzed asymmetric 1,2-reductions of $\alpha$ -substituted enones                  | S15-S21 |
| VI.  | Tandem 1-pot asymmetric 1,2-reduction of an enone followed by 1,4-reduction of an enoate | S22     |
| VII. | Characterization data                                                                    | S23-S70 |

## I. General Information

Unless otherwise noted, all reactions were performed in oven-dried glassware under an atmosphere of argon. Low temperature reactions were cooled in an acetone or isopropanol bath, hold at the indicated temperature using a cryostat. DEMS (Alfa Aesar, Stock # A10153) was used as received without further purification. THF was freshly distilled from benzophenone-sodium ketyl. Et<sub>2</sub>O (anhydrous, Fisher, Stock # E138-20) was used as received. Analytical thin layer chromatography (TLC) was performed using Silica Gel 60 F<sub>254</sub> plates (Merck, 0.25 mm thick). The developed chromatogram was analyzed by UV lamp (254 nm) or aqueous potassium permanganate (KMnO<sub>4</sub>). Flash chromatography was either performed in glass columns using Silica Flash<sup>®</sup> P60 (SiliCycle, 40-63  $\mu$ m), or on pre-packed SINGLE StEP<sup>™</sup> columns (standard silica, Thomson) using a BIOTAGE SP-4<sup>®</sup> system. GCMS data was recorded on a 5975C Mass Selective Detector, coupled with a 7890A Gas Chromatograph (Agilent Technologies). As capillary column a HP-5MS cross-linked 5% phenylmethylpolysiloxanediphenyl column (30 m x 0.250 mm, 0.25 micron, Agilent Technologies) was employed. Helium was used as carrier gas at a constant flow of 1 mL/min. Retention times ( $t_R$ ) refer to the following temperature program: 50°C for 5 min; heating rate 20°C/min; 300°C for 20 min; injection temperature 250°C; detection temperature 280°C. <sup>1</sup>H and <sup>13</sup>C spectra were recorded at 22°C on a Varian UNITY INOVA Avance 400 MHz or a Varian UNITY INOVA 500 MHz. Chemical shifts in <sup>1</sup>H NMR spectra are reported in parts per million (ppm) on the  $\delta$  scale from an internal standard of residual chloroform (7.27 ppm). Data are reported as follows: chemical shift, multiplicity (s = singlet, d = doublet, t = triplet, q = quartet, m = multiplet), coupling constant in hertz (Hz), and integration. Chemical shifts of <sup>13</sup>C NMR spectra are reported in ppm from the central peak of CDCl<sub>3</sub> (77.23 ppm) on the  $\delta$  scale. High resolution mass analyses were obtained using a VG70 double-focusing magnetic sector instrument (VG Analytical) for EI and a PE Sciex QStar Pulsar quadrupole/TOF instrument (API) for ESI.

## II. Optimization conditions for regio- and stereocontrolled 1,2-reductions

### Optimization procedure for the enantioselective CuH-catalyzed 1,2-reduction of $\alpha$ -substituted enones:

A conical 3 mL microwave vial containing a conical stir bar was charged with fine powdered  $\text{Cu}(\text{OAc})_2 \cdot \text{H}_2\text{O}$  (0.5 mg, 3 mol %, 3  $\mu\text{mol}$ ) and ligand (3 mol %, 3  $\mu\text{mol}$ ). The vial was capped with a rubber septum and placed under an Argon atmosphere, 0.2 mL solvent was added via syringe. At rt, silane (0.3 mmol) was introduced and stirred for 10 min. The vial was then placed into a pre-cooled acetone bath at the indicated temperature and stirred for an additional 5 min. The substrate (16 mg, 0.1 mmol) was subsequently introduced *via* syringe. The side of the reaction vial was rinsed with  $\text{Et}_2\text{O}$  (2 x 50  $\mu\text{L}$ ). Conversion was monitored by TLC and the reaction was quenched at the indicated temperature after the indicated time by the addition of 0.5 mL sat.  $\text{NH}_4\text{F}/\text{MeOH}$ . The reaction vial was taken out of the cooling bath and warmed to rt. After filtration through  $\text{SiO}_2$ , the solvent was evaporated *in vacuo* and the crude reaction mixture was analyzed by NMR and purified by column chromatography on silica gel. The purified product was analyzed by analytical HPLC on a chiral stationary phase for the determination of *ee*.

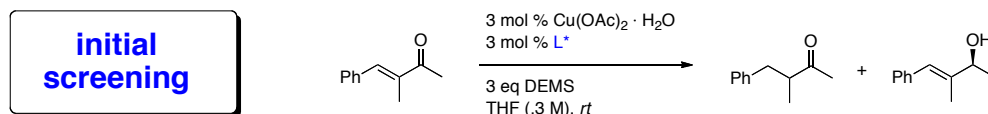

| entry | Ligand                          | convn. [%] (time)<br>(TLC) | 1,4-reduction<br>(isolated yield) | 1,2-reduction<br>(isolated yield) | ee [%]<br>(HPLC) | exp.  |
|-------|---------------------------------|----------------------------|-----------------------------------|-----------------------------------|------------------|-------|
| 1     | BDP                             | 100 (10 h)                 | 60                                | 9                                 | <i>n.d.</i>      | RM656 |
| 2     | SL-J002-1 "JosiPhos"            | 100 (4.5 h)                | trace                             | 90                                | 50               | RM590 |
| 3     | SL-W001-1 "WalPhos"             | 100 (4.5 h)                | trace                             | 74                                | 17               | RM586 |
| 4     | SL-T001-1 "TaniaPhos"           | 100 (4.5 h)                | 15                                | 66                                | 11               | RM587 |
| 5     | ( <i>R</i> )-DTBM-SEGPHOS       | > 90 (4.5 h)               | trace                             | 78                                | 75               | RM588 |
| 6     | ( <i>S</i> )-3,5-Xyl-MeO-BIPHEP | 100 (4.5 h)                | trace                             | 85                                | 72               | RM589 |

**(R)-SEGPPOS**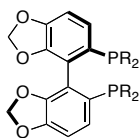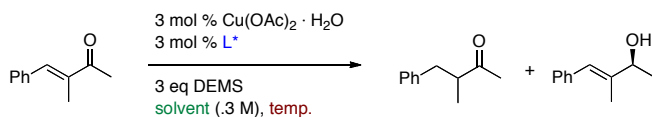

|                     | Ligand           | solvent | temp. [°C] | convn. [%] (time)<br>(TLC) | 1,4-reduction<br>(isolated yield) | 1,2-reduction<br>(isolated yield) | ee [%]<br>(HPLC) | exp.  |
|---------------------|------------------|---------|------------|----------------------------|-----------------------------------|-----------------------------------|------------------|-------|
| R = Ph              | (R)-SEGPPOS      | THF     | -25        | 30 (96 h)                  | trace                             | 19                                | 80               | RM610 |
| R = <sup>i</sup> Pr | (R)-iPr-SEGPPOS  | THF     | -25        | 5 (96 h)                   | n.d.                              | < 5                               | 4                | RM614 |
| PR <sub>2</sub> =   | (R)-MP2-SEGPPOS  | THF     | -25        | 30 (96 h)                  | trace                             | 19                                | 59               | RM612 |
| PR <sub>2</sub> =   | (R)-P3-SEGPPOS   | THF     | -25        | 40 (96 h)                  | trace                             | 21                                | 62               | RM613 |
| R =                 | (R)-DM-SEGPPOS   | THF     | -25        | 100 (8 h)                  | trace                             | 70                                | 81               | RM611 |
| R =                 | (R)-DTBM-SEGPPOS | THF     | rt         | > 90 (4.5 h)               | trace                             | 78                                | 75               | RM588 |
|                     |                  |         | -25        | 100 (5.5 h)                | 1                                 | 87                                | 86               | RM592 |
|                     |                  |         | -50        | 100 (11 h)                 | trace                             | 86                                | 89               | RM623 |
|                     |                  |         | -78        | 0 (36 h)                   | -                                 | -                                 | -                | RM599 |

**(R)-SEGPPOS**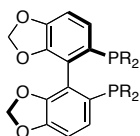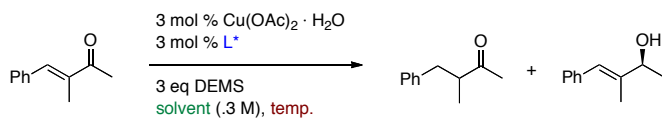

|     | Ligand           | solvent | temp. [°C] | convn. [%] (time)<br>(TLC) | 1,4-reduction<br>(isolated yield) | 1,2-reduction<br>(isolated yield) | ee [%]<br>(HPLC) | exp.  |
|-----|------------------|---------|------------|----------------------------|-----------------------------------|-----------------------------------|------------------|-------|
| R = | (R)-DTBM-SEGPPOS | THF     | rt         | > 90 (4.5 h)               | trace                             | 78                                | 75               | RM588 |
|     |                  |         | -25        | 100 (5.5 h)                | 1                                 | 87                                | 86               | RM592 |
|     |                  |         | -50        | 100 (11 h)                 | trace                             | 86                                | 89               | RM623 |
|     |                  |         | -78        | 0 (36 h)                   | -                                 | -                                 | -                | RM599 |
|     |                  | toluene | -25        | 20 (21 h)                  | trace                             | 5                                 | n.d.             | RM604 |
|     |                  | DCM     | -25        | 10 (21 h)                  | trace                             | 1                                 | n.d.             | RM605 |
|     |                  | hexanes | -25        | 40 (21 h)                  | trace                             | 20                                | 90               | RM606 |
|     |                  | DMF     | -25        | 0 (21 h)                   | -                                 | -                                 | -                | RM607 |
|     |                  | MeOH    | -25        | 0 (21 h)                   | -                                 | -                                 | -                | RM608 |

**(R)-SEGPPOS**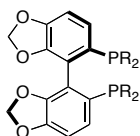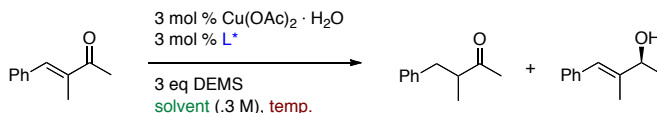

| Ligand                          | solvent           | temp. [°C] | convn. [%] (time)<br>(TLC) | 1,4-reduction<br>(isolated yield) | 1,2-reduction<br>(isolated yield) | ee [%]<br>(HPLC) | exp.  |
|---------------------------------|-------------------|------------|----------------------------|-----------------------------------|-----------------------------------|------------------|-------|
| R =            (R)-DTBM-SEGPPOS | MTBE              | -25        | 100 (9 h)                  | trace                             | 86                                | 88               | RM617 |
|                                 | 2-MeTHF           | -25        | < 10 (21 h)                | trace                             | < 5                               | n.d.             | RM618 |
|                                 | CPME              | -25        | 100 (21 h)                 | 2                                 | 83                                | 85               | RM619 |
|                                 | DME               | -25        | 100 (9 h)                  | 3                                 | 81                                | 83               | RM620 |
|                                 | Et <sub>2</sub> O | -25        | 100 (6 h)                  | 2                                 | 83                                | 91               | RM609 |
|                                 |                   | -35        | 25 (80 h)                  | trace                             | 12                                | 87               | RM674 |
|                                 |                   | -50        | < 5 (26 h)                 | n.d.                              | n.d.                              | n.d.             | RM669 |
|                                 |                   | -78        | < 5 (26 h)                 | n.d.                              | n.d.                              | n.d.             | RM671 |
| (S)-DTBM-SEGPPOS                | Et <sub>2</sub> O | -25        | 100 (5 h)                  | trace                             | 87                                | 88               | RM703 |

**(R)-MeO-BIPHEP**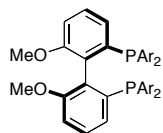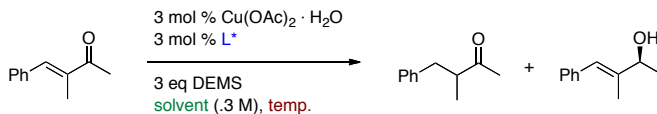

| Ligand                                      | solvent           | temp. [°C] | convn. [%] (time)<br>(TLC) | 1,4-reduction<br>(isolated yield) | 1,2-reduction<br>(isolated yield) | ee [%]<br>(HPLC) | exp.  |
|---------------------------------------------|-------------------|------------|----------------------------|-----------------------------------|-----------------------------------|------------------|-------|
| R =            (S)-3,5-Xyl-MeO-BIPHEP       | THF               | -25        | 100 (21 h)                 | trace                             | 83                                | 85               | RM593 |
|                                             | Et <sub>2</sub> O | -25        | 100 (8.5 h)                | trace                             | 96                                | 89               | RM740 |
| R =            (S)-3,5-iPr-MeO-BIPHEP       | THF               | -25 to rt  | < 5 (22 h)                 | n.d.                              | n.d.                              | n.d.             | RM736 |
|                                             | Et <sub>2</sub> O | -25 to rt  | < 5 (20 h)                 | n.d.                              | n.d.                              | n.d.             | RM742 |
| R =            (S)-3,4,5-Me-MeO-BIPHEP      | THF               | -25        | 100 (8 h)                  | trace                             | 76                                | 84               | RM615 |
|                                             | Et <sub>2</sub> O | -25        | 100 (8.5 h)                | trace                             | 95                                | 91               | RM741 |
|                                             |                   | -45        | < 5 (28 h)                 | n.d.                              | n.d.                              | n.d.             | RM747 |
| R =            (R)-3,5-tBu-4-MeO-MeO-BIPHEP | THF               | -25        | 100 (5 h)                  | trace                             | 98                                | 89               | RM737 |
|                                             | Et <sub>2</sub> O | -25        | 100 (9 h)                  | trace                             | 99                                | 90               | RM743 |
|                                             |                   | -45        | < 10 (36 h)                | trace                             | 5                                 | 86               | RM748 |

### JOSIPHOS

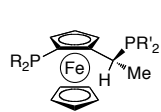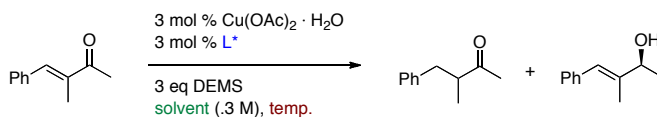

|                                             | Ligand    | solvent           | temp. [°C]       | convn. [%] (time)<br>(TLC) | 1,4-reduction<br>(isolated yield) | 1,2-reduction<br>(isolated yield) | ee [%]<br>(HPLC) | exp.    |
|---------------------------------------------|-----------|-------------------|------------------|----------------------------|-----------------------------------|-----------------------------------|------------------|---------|
| R = Ph, R' = <i>t</i> -Bu                   | SL-J002-1 | THF               | <i>rt</i>        | 100 (4.5 h)                | trace                             | 90                                | 50               | RM590   |
|                                             |           | Et <sub>2</sub> O | -25              | 70 (32 h)                  | trace                             | 43                                | 69               | RM594   |
| R = Cy, R' = Ph                             | SL-J004-1 | Et <sub>2</sub> O | -25              | 40 (20 h)                  | trace                             | 33                                | 42               | ZB3-208 |
| R = Ph, R' = 3,5-Xylyl                      | SL-J005-1 | Et <sub>2</sub> O | -25              | 100 (20 h)                 | trace                             | 81                                | 52               | ZB3-209 |
| R = 3,5-CF <sub>3</sub> Ph, R' = 3,5-Xylyl  | SL-J008-1 | Et <sub>2</sub> O | -25              | 100 (20 h)                 | trace                             | 82                                | 3                | ZB3-210 |
| R = 4-CF <sub>3</sub> Ph, R' = <i>t</i> -Bu | SL-J011-1 | Et <sub>2</sub> O | -25              | 40 (20 h)                  | trace                             | 31                                | 57               | ZB3-211 |
| R = 3,5-Me-4-MeO, R' = <i>t</i> -Bu         | SL-J013-1 | Et <sub>2</sub> O | -25              | 100 (20 h)                 | trace                             | 81                                | 54               | ZB3-212 |
| R = 2-Furyl, R' = 3,5-Xylyl                 | SL-J015-1 | Et <sub>2</sub> O | -25              | 100 (40 h)                 | 4                                 | 85                                | 9                | RM724   |
| R = 1-Naphtyl, R' = 3,5-Xylyl               | SL-J404-1 | Et <sub>2</sub> O | -25              | 100 (26 h)                 | trace                             | 89                                | 25               | RM725   |
| R = 3,5-Me-4-MeO, R' = 2-Tolyl              | SL-J425-1 | Et <sub>2</sub> O | -25 to <i>rt</i> | 100 (38 h)                 | trace                             | 86                                | 10               | RM726   |
| R = <i>t</i> -Bu, R' = Ph                   | SL-J502-1 | Et <sub>2</sub> O | -25              | 100 (40 h)                 | trace                             | 87                                | 27               | RM727   |
| R = <i>t</i> -Bu, R' = 2-Tolyl              | SL-J505-1 | Et <sub>2</sub> O | -25 to <i>rt</i> | 15 (38 h)                  | trace                             | 10                                | 3                | RM728   |

### Phosphoramidates

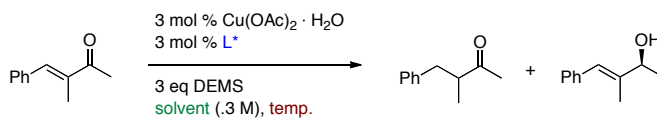

|  | Ligand                                  | solvent           | temp. [°C] | convn. [%] (time)<br>(TLC) | 1,4-reduction<br>(isolated yield) | 1,2-reduction<br>(isolated yield) | ee [%]<br>(HPLC) | exp.    |
|--|-----------------------------------------|-------------------|------------|----------------------------|-----------------------------------|-----------------------------------|------------------|---------|
|  | 3,3'-Me-Monphos                         | Et <sub>2</sub> O | -25        | 10 (12 h)                  | trace                             | 7                                 | <i>n.d.</i>      | ZB3-201 |
|  |                                         | Et <sub>2</sub> O | <i>rt</i>  | 30 (7 h)                   | trace                             | 20                                | 2                | ZB3-205 |
|  | ( <i>S,R,R</i> )-N(CPhHMe) <sub>2</sub> | Et <sub>2</sub> O | -25        | 0 (12 h)                   | -                                 | -                                 | -                | ZB3-202 |

**Bisphosphine ligands**

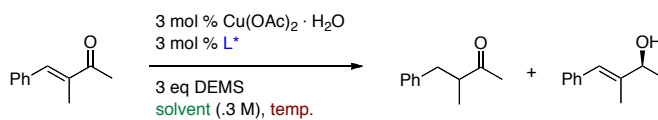

| Ligand                                                                                                                  | solvent | temp. [°C] | convn. [%] (time)<br>(TLC) | 1,4-reduction<br>(isolated yield) | 1,2-reduction<br>(isolated yield) | ee [%]<br>(HPLC) | exp.  |
|-------------------------------------------------------------------------------------------------------------------------|---------|------------|----------------------------|-----------------------------------|-----------------------------------|------------------|-------|
| (R)-BINAP                                                                                                               | THF     | -25        | 100 (60 h)                 | trace                             | 91                                | 73               | RM704 |
| 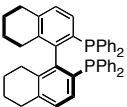 (S)-H8-BINAP                          | THF     | -25        | 85 (60 h)                  | trace                             | 75                                | 67               | RM715 |
| 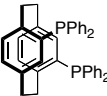 (R)-[2.2]-Phanephos                   | THF     | -25        | 20 (96 h)                  | n.d.                              | 13                                | 57               | RM616 |
| 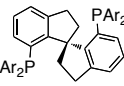 (S)-(-)-DM-TUCKUP<br>(Ar = 3,5-Xylyl) | THF     | -25 to rt  | 10 (72 h)                  | n.d.                              | n.d.                              | n.d.             | RM709 |

**Bisphosphine ligands**

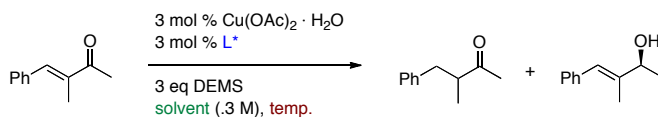

| Ligand                                                                                                 | solvent | temp. [°C] | convn. [%] (time)<br>(TLC) | 1,4-reduction<br>(isolated yield) | 1,2-reduction<br>(isolated yield) | ee [%]<br>(HPLC) | exp.  |
|--------------------------------------------------------------------------------------------------------|---------|------------|----------------------------|-----------------------------------|-----------------------------------|------------------|-------|
| 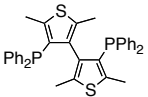 (-)-TetraMe-BITIOP | THF     | -25 to rt  | 15 (72 h)                  | n.d.                              | n.d.                              | n.d.             | RM710 |
| 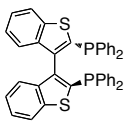 (S)-(-)-Bitianp    | THF     | -25        | 90 (60 h)                  | trace                             | 81                                | 62               | RM714 |
| 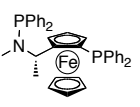 (S,R)-Me-BoPhoz    | THF     | -25 to rt  | 60 (28 h)                  | 10                                | 55                                | 38               | RM713 |
| (-)-DANP                                                                                               | THF     | -25        | 50 (60 h)                  | trace                             | 25                                | n.d.             | RM716 |

**SEGPPOS analogues**
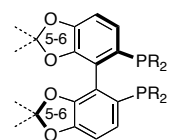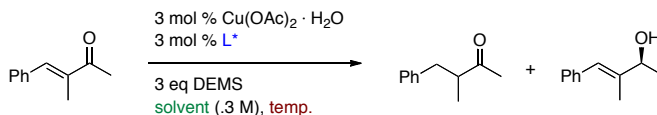

| Ligand                       | solvent | temp. [°C]       | convn. [%] (time)<br>(TLC) | 1,4-reduction<br>(isolated yield) | 1,2-reduction<br>(isolated yield) | ee [%]<br>(HPLC) | exp.  |
|------------------------------|---------|------------------|----------------------------|-----------------------------------|-----------------------------------|------------------|-------|
| <br>( <i>R</i> )-DifluorPhos | THF     | -25 to <i>rt</i> | 100 (72 h)                 | trace                             | 91                                | 67               | RM706 |
| <br>( <i>R</i> )-SynPhos     | THF     | -25              | 100 (16 h)                 | trace                             | 87                                | 77               | RM705 |

**BIPHEP analogues**
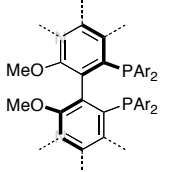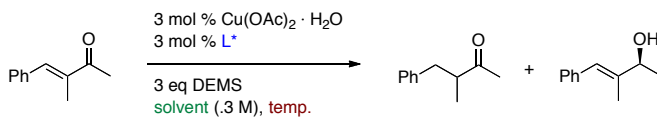

| Ligand                                    | solvent | temp. [°C]       | convn. [%] (time)<br>(TLC) | 1,4-reduction<br>(isolated yield) | 1,2-reduction<br>(isolated yield) | ee [%]<br>(HPLC) | exp.  |
|-------------------------------------------|---------|------------------|----------------------------|-----------------------------------|-----------------------------------|------------------|-------|
|                                           | THF     | -25 to <i>rt</i> | 15 (72 h)                  | trace                             | 13                                | 14**             | RM707 |
| <br>Ar =                                  | THF     | -25              | 100 (16 h)                 | trace                             | 91                                | 77               | RM708 |
| <br>CTH-( <i>R</i> )-Xylyl-P-Phos<br>Ar = | THF     | -25 to <i>rt</i> | 100 (22 h)                 | 4                                 | 90                                | 77               | RM738 |

\*\* = quality and source of ligand unknown

Use of PMHS as hydride source instead did not improve *ee*.

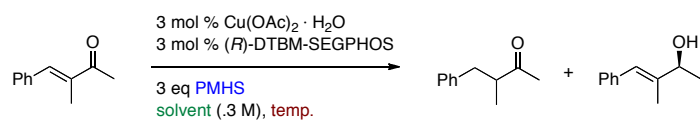

| solvent           | temp. [°C] | convn. [%] (time)<br>(TLC) | 1,4-reduction<br>(isolated yield) | 1,2-reduction<br>(isolated yield) | ee [%]<br>(HPLC) | exp.  |
|-------------------|------------|----------------------------|-----------------------------------|-----------------------------------|------------------|-------|
| THF               | -25        | 100 (9 h)                  | trace                             | 82                                | 82               | RM621 |
| Et <sub>2</sub> O | -25        | 100 (16 h)                 | trace                             | 72                                | 86               | RM622 |

### III. Synthesis of $\alpha$ -substituted $\alpha,\beta$ -unsaturated ketones

**General procedure for the synthesis of  $\alpha$ -substituted enones** (unoptimized conditions). To a 50 mL round bottom flask was added 20 mL of glacial acetic acid and 2 mL of sulfuric acid. A ketone was introduced followed by the addition of an aldehyde. The vial was capped with a rubber septum and stirred overnight at rt. The mixture was then diluted with diethylether and neutralized with saturated *aq.* sodium bicarbonate and extracted three times with diethylether. The organic layer was separated and washed with water and then brine, and dried over anhydrous  $\text{MgSO}_4$ . The solvent was evaporated *in vacuo* and the product isolated by silica gel column chromatography using EtOAc in hexanes 3% to 8% gradient.

#### (*E*)-2-Methyl-1-phenylpent-1-en-3-one(3)<sup>1</sup>

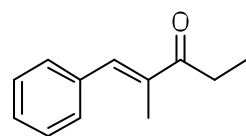

Following the general procedure for  $\alpha$ -substituted enones, using 3-pentanone (11 mmol, 1.1 equiv) and benzaldehyde (10 mmol, 1 equiv);  $^1\text{H}$  NMR (400 MHz,  $\text{CDCl}_3$ ):  $\delta$  1.18 (t,  $J = 7.2$  Hz, 3H), 2.07 (d,  $J = 0.8$  Hz, 3H), 2.85 (q,  $J = 7.2$  Hz, 2H), 7.31-7.38 (m, 1H), 7.39-7.42 (m, 4H), 7.53 (s, 1H).

#### (*E*)-3-benzylidenepentan-2-one (4)

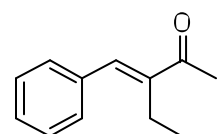

Following the general procedure for  $\alpha$ -substituted enone, using 2-pentanone (11 mmol, 1.1 equiv) and benzaldehyde (10 mmol, 1 equiv); spectra matches previously reported data.<sup>2</sup>

#### (*E*)-3-Benzylideneoctan-2-one (5)

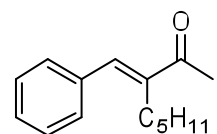

Following the general procedure for  $\alpha$ -substituted enones, using 2-octanone (11 mmol, 1.1 equiv) and benzaldehyde (10 mmol, 1 equiv);  $^1\text{H}$  NMR (400 MHz,  $\text{CDCl}_3$ ):  $\delta$  0.88 (t,  $J = 6.8$  Hz, 3H), 1.27-1.34 (m, 4H), 1.43-1.47 (m, 2H), 2.40-2.50 (m, 5H), 7.34-7.47 (m, 6H).  $^{13}\text{C}$  NMR (125 MHz,  $\text{CDCl}_3$ ):  $\delta$  14.2, 22.6, 26.4, 26.5, 29.0, 32.2, 128.7, 128.7, 129.4, 136.0, 139.6, 143.3, 200.5; HRMS(EI) calcd. for  $\text{C}_{15}\text{H}_{20}\text{O}$  ( $\text{M}^+$ ): 216.1514, found: 216.1520.

**(E)-3,4-Diphenylbut-3-en-2-one (6)**<sup>5</sup>

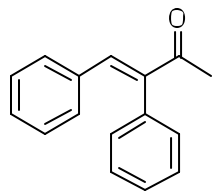

Pd(dtbpf)Cl<sub>2</sub> (7 mg, 5 mol %, 0.011 mmol) was dissolved in 1 ml (0.22 M) of THF followed by the addition of Et<sub>3</sub>N (66 mg, 0.66 mmol, 3 equiv.), 3-bromo-4-phenyl-3-buten-2-one (0.22 mmol, 50 mg), phenylboronic acid (0.44 mmol, 2 equiv., 54 mg), and water (0.1 ml), and stirred at room temperature until the full consumption of the bromide. Product was isolated using column chromatography (6 % ethyl acetate in hexanes) yielding title compound as crystalline solid in 95% yield (190 mg). <sup>1</sup>H NMR (400 MHz, CDCl<sub>3</sub>): δ 2.32 (s, 3H), 7.02–7.04 (m, 2H), 7.14–7.22 (m, 5H), 7.39–7.42 (m, 3H), 7.65 (s, 1H).

**(Z)-3-Bromo-4-phenyl-3-buten-2-one (7)**<sup>3</sup>

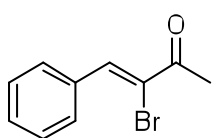

Prepared according to a previously published procedure.<sup>4</sup>

<sup>1</sup>H NMR (400 MHz, CDCl<sub>3</sub>): δ 2.60 (s, 3H), 7.43-7.45 (m, 3H), 7.86-7.88 (m, 2H), 8.03 (s, 1H).

**(E)-3-Methylnon-3-en-2-one (8)**

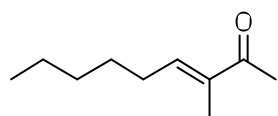

Following the general procedure for α-substituted enones, using 2-butanone (20 mmol, 10 equiv) and hexanal (2 mmol, 1 equiv); <sup>1</sup>H NMR (400 MHz, CDCl<sub>3</sub>): δ 0.90 (t, *J* = 7.2 Hz, 3H), 1.30–1.35 (m, 4H), 1.42-1.51 (m, 2H), 1.76 (s, 3H), 2.20-2.27 (m, 2H), 2.31 (s, 3H), 6.63 (t, *J* = 7.2 Hz, 1H). <sup>13</sup>C NMR (125 MHz, CDCl<sub>3</sub>): δ 11.3, 14.2, 22.7, 25.6, 28.5, 29.3, 31.8, 137.8, 144.3, 200.2; HRMS(EI) calcd. for C<sub>10</sub>H<sub>18</sub>O (M<sup>+</sup>): 154.1358, found: 154.1361.

**(E)-4-(4-Methoxyphenyl)-3-methyl-3-buten-2-one (9)**<sup>5</sup>

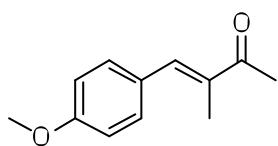

Following the general procedure for α-substituted enones, using 2-butanone (11 mmol, 1.1 equiv) and 4-methoxybenzaldehyde (10 mmol, 1 equiv); <sup>1</sup>H NMR (400 MHz, CDCl<sub>3</sub>): δ 2.06 (s, 3H), 2.45 (s, 3H), 3.85 (s, 3H), 6.94 (d, *J* = 8 Hz, 2H), 7.41 (d, *J* = 8 Hz, 2H), 7.47 (s, 1H).

**(E)-4-(3-Methoxyphenyl)-3-methyl-3-buten-2-one (10)**<sup>1</sup>

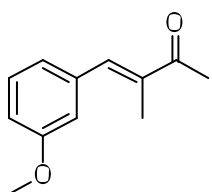

Following the general procedure for α-substituted enones, using 2-butanone (11 mmol, 1.1 equiv) and 3-methoxybenzaldehyde (10 mmol, 1 equiv); <sup>1</sup>H NMR (400 MHz, CDCl<sub>3</sub>): δ 2.05 (s, 3H), 2.46 (s, 3H), 3.83 (s, 3H), 6.89 (dd, *J* = 8.4 Hz, 1H), 6.94 (t, *J* = 1.6 Hz, 1H), 7.00 (d, *J* = 7.6 Hz, 1H), 7.33 (t, *J* = 8 Hz, 1H), 7.49 (s, 1H).

**(E)-3-Methyl-4-(4-methylphenyl)-3-buten-2-one (11)<sup>1</sup>**

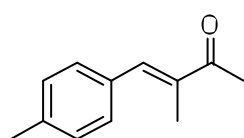

Following the general procedure for  $\alpha$ -substituted enones, using 2-butanone (11 mmol, 1.1 equiv) and 4-tolualdehyde (10 mmol, 1 equiv); <sup>1</sup>H NMR (400 MHz, CDCl<sub>3</sub>):  $\delta$  2.06 (s, 3H), 2.38 (s, 3H), 2.46 (s, 3H), 7.22 (d,  $J$  = 8 Hz, 2H), 7.34 (d,  $J$  = 8.4 Hz, 2H), 7.50 (s, 1H).

**(E)-3-Methyl-4-(4-trifluoromethylphenyl)-3-buten-2-one (12)**

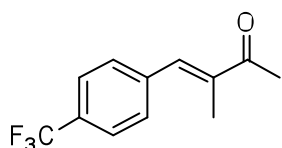

Following the general procedure for  $\alpha$ -substituted enones, using 2-butanone (11 mmol, 1.1 equiv) and 4-(trifluoromethyl)-benzaldehyde (10 mmol, 1 equiv) used as aldehyde; <sup>1</sup>H NMR (400 MHz, CDCl<sub>3</sub>):  $\delta$  2.04 (s, 3H), 2.48 (s, 3H), 7.49-7.51 (m, 3H), 7.66 (d,  $J$  = 8.4 Hz, 2H); <sup>13</sup>C NMR (100 MHz, CDCl<sub>3</sub>):  $\delta$  13.2, 26.1, 124.1 (q, <sup>1</sup> $J_{CF}$  = 270 Hz), 125.6 (q, <sup>3</sup> $J_{CF}$  = 4 Hz), 129.9 (q, <sup>2</sup> $J_{CF}$  = 32 Hz), 130.0, 137.8, 139.6, 139.7, 200.1; HRMS(EI) calcd. for C<sub>12</sub>H<sub>11</sub>F<sub>3</sub>O (M<sup>+</sup>): 228.0762, found: 228.0759.

**(E)-3-Methyl-4-(4-nitrophenyl)-3-buten-2-one (13)<sup>6</sup>**

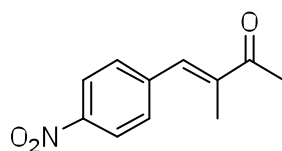

Following the general procedure for  $\alpha$ -substituted enones, using 2-butanone (11 mmol, 1.1 equiv) and 4-nitrobenzaldehyde (10 mmol, 1 equiv); <sup>1</sup>H NMR (400 MHz, CDCl<sub>3</sub>):  $\delta$  2.05 (s, 3H), 2.49 (s, 3H), 7.51 (s, 1H), 7.55 (d,  $J$  = 8.8 Hz, 2H), 8.28 (d,  $J$  = 5.2 Hz, 2H).

**(E)-4-(6-Bromobenzo-1,3-dioxol-5-yl)-3-methyl-3-buten-2-one (14)**

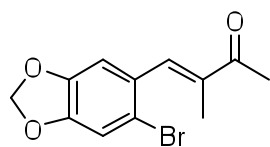

Following the general procedure for  $\alpha$ -substituted enones, using 2-butanone (11 mmol, 1.1 equiv) and 6-bromopiperonal (10 mmol, 1 equiv); <sup>1</sup>H NMR (400 MHz, CDCl<sub>3</sub>):  $\delta$  1.92 (d,  $J$  = 1.6 Hz, 3H), 2.47 (s, 3H), 6.29 (s, 2H), 6.84 (s, 1H), 7.10 (s, 1H), 7.50 (d,  $J$  = 1.2 Hz, 1H); <sup>13</sup>C NMR (100 MHz, CDCl<sub>3</sub>):  $\delta$  = 13.0, 26.1, 102.3, 110.2, 113.1, 116.1, 129.1, 138.2, 139.2, 147.3, 148.7, 200.1; HRMS(EI) calcd. for C<sub>12</sub>H<sub>11</sub>BrO<sub>3</sub> (M<sup>+</sup>): 281.9892, found: 281.9899.

## 2-Methyl-3-oxocyclohex-1-en-1-yl trifluoromethanesulfonate (17)<sup>7</sup>

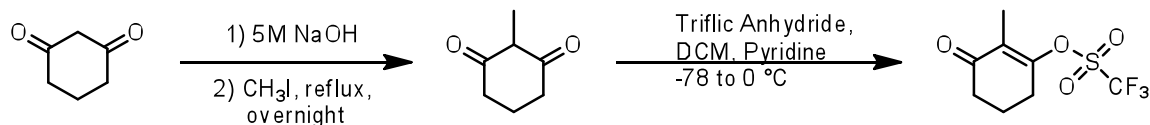

*Step 1:* 1,3-Cyclohexanedione (5.6 g, 50 mmol) was dissolved in 5 M NaOH (2 g in 10 mL H<sub>2</sub>O, 50 mmol) followed by the addition of methyl iodide (16.33 g, 115 mmol, 2.3 equiv) and was refluxed overnight. Product was isolated as a crystalline solid (1.28 g, 20 % yield).<sup>8</sup>

*Step 2:* 2-Methyl-1,3-cyclohexanedione (214 mg, 1.7 mmol) was dissolved in 10 mL of DCM (0.17 M), followed by the addition of pyridine (268 mg, 3.4 mmol, 2 equiv), and upon cooling to -78 °C, triflic anhydride (575 mg, 2.04 mmol, 1.2 equiv) was added dropwise. The mixture was warmed to 0 °C and stirred until the consumption of the starting material. Product was isolated using column chromatography (gradient 6-8 % EtOAc in hexanes).<sup>9</sup> <sup>1</sup>H NMR (400 MHz, CDCl<sub>3</sub>): δ 1.86 (t, *J* = 2 Hz, 3H), 2.05–2.12 (m, 2H), 2.47–2.51 (m, 2H), 2.72–2.76 (m, 2H).

## IV. Addition to Table 2

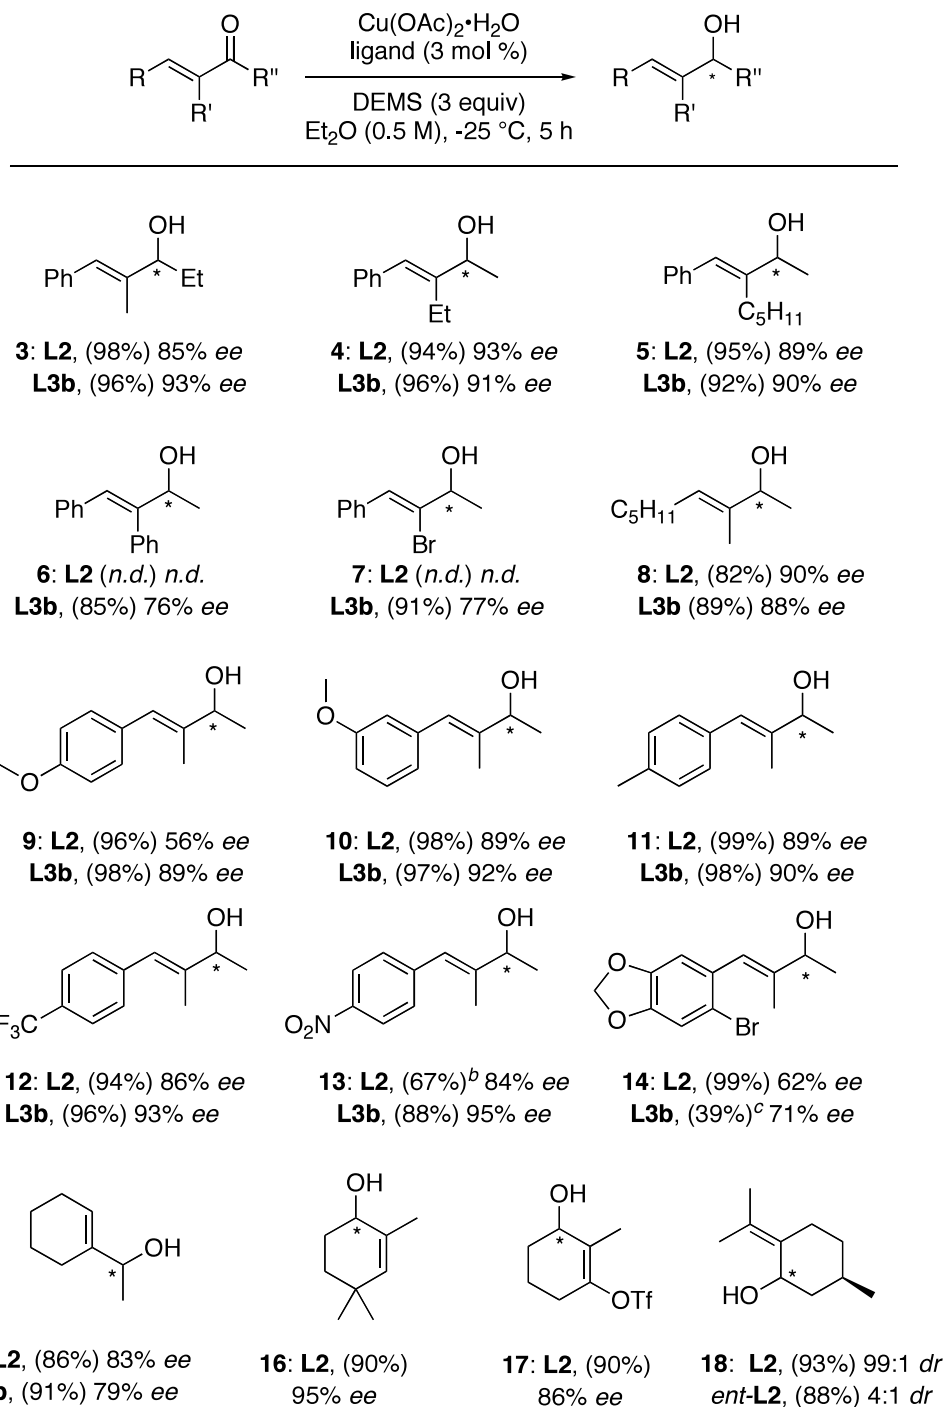

<sup>a</sup> Reactions were carried out on 0.25 mmol scale in 0.5 mL Et<sub>2</sub>O. Isolated yields after column chromatography are given in parentheses. *Ee*'s were determined by chiral HPLC or chiral GC analysis.

<sup>b</sup> 1,4-Reduction product was isolated in 24% yield. <sup>c</sup> Low conversion after 17 h.

## V. CuH catalyzed asymmetric 1,2-reductions of $\alpha$ -substituted enones

### General procedure for the enantioselective CuH-catalyzed 1,2-reduction of $\alpha$ -substituted enones using (*R*)-DTBM-SEGPBOS (*GP1*):

A conical 3 mL microwave vial containing a conical stir bar was charged with fine powdered Cu(OAc)<sub>2</sub> • H<sub>2</sub>O (1.3 mg, 3 mol %, 7.5  $\mu$ mol) and (*R*)-DTBM-SEGPBOS (8.8 mg, 3 mol %, 7.5  $\mu$ mol). The vial was capped with a rubber septum and placed under an Argon atmosphere, 0.4 mL Et<sub>2</sub>O was added via syringe. At rt, DEMS (120  $\mu$ L, 0.75 mmol) was introduced, resulting in a brown solution after 10 min. The vial was then placed into a pre-cooled acetone bath at -25 °C and stirred for an additional 5 min. Liquid substrates (0.25 mmol) were subsequently introduced *via* syringe; solid substrates (0.25 mmol) were added all at once. The side of the reaction vial was rinsed with Et<sub>2</sub>O (2 x 50  $\mu$ L). After TLC confirmed full conversion, the reaction was quenched at -25 °C by the addition of 0.5 mL sat. NH<sub>4</sub>F/MeOH. The reaction vial was taken out of the cooling bath and warmed to rt. After filtration through SiO<sub>2</sub>, the solvent was evaporated *in vacuo* and the crude reaction mixture purified by column chromatography on silica gel.

### General procedure for the enantioselective CuH-catalyzed 1,2-reduction of $\alpha$ -substituted enones using (*S*)-3,4,5-Me-MeO-BIPHEP (*GP2*):

A conical 3 mL microwave vial containing a conical stir bar was charged with fine powdered Cu(OAc)<sub>2</sub> • H<sub>2</sub>O (1.3 mg, 3 mol %, 7.5  $\mu$ mol) and (*S*)-3,4,5-Me-MeO-BIPHEP (5.6 mg, 3 mol %, 7.5  $\mu$ mol). The vial was capped with a rubber septum and placed under an Argon atmosphere, Et<sub>2</sub>O (0.4 mL) was added *via* syringe. At rt, DEMS (120  $\mu$ L, 0.75 mmol) was introduced, resulting in a brown solution after 40 min. The vial was then placed into a pre-cooled acetone bath at -25 °C and stirred for an additional 5 min. Liquid substrates (0.25 mmol) were subsequently introduced *via* syringe, while solid substrates (0.25 mmol) were added all at once. The side of the reaction vial was rinsed with Et<sub>2</sub>O (2 x 50  $\mu$ L). After TLC confirmed full conversion, the reaction was quenched at -25 °C by the addition of 0.5 mL sat. NH<sub>4</sub>F/MeOH. The reaction vial was taken out of the cooling bath and warmed to rt. After filtration through SiO<sub>2</sub>, the solvent was evaporated *in vacuo* and the crude reaction mixture purified by column chromatography on silica gel.

**(S)-(+)-3-Methyl-4-phenyl-but-3-en-2-ol.**<sup>10,11</sup>

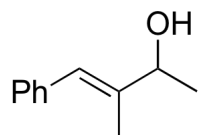

Using **GPI**: TLC:  $R_f = 0.24$  (25% EtOAc/hexanes, UV +  $\text{KMnO}_4$ ); column chromatography: Biotage, 0-25% EtOAc/hexanes; 39.8 mg (98% yield); colorless viscous oil;  $^1\text{H}$  NMR (500 MHz,  $\text{CDCl}_3$ ):  $\delta$  1.37 (d,  $J = 6.5$  Hz, 3H), 1.62 (br, 1H), 1.89 (s, 3H), 4.39 (q,  $J = 6.5$  Hz, 1H), 6.52 (s, 1H), 7.20-7.35 (m, 5H);  $^{13}\text{C}$  NMR (125 MHz,  $\text{CDCl}_3$ ):  $\delta$  13.61, 22.00, 73.88, 124.61, 126.61, 128.32, 129.16, 137.83, 141.80; HRMS(EI) calcd. for  $\text{C}_{11}\text{H}_{14}\text{O}$  ( $\text{M}^+$ ) 162.1045, found: 162.1041; HPLC separation conditions: CHIRALCEL OD-H, 254 nm, 5% IPA/hexanes, 1.0 mL/min,  $t_R = 9.3$  and 10.6 min, 91% *ee*;  $[\alpha]_{589}^{20} = +6.2$  ( $c = 0.34$ ,  $\text{CHCl}_3$ ) (lit.  $[\alpha]_{589}^{20} = -7.0$  ( $c = 0.27$ ,  $\text{CHCl}_3$ ) for (*R*)-enantiomer)<sup>14</sup>.

**(R)-(+)-2-Methyl-1-phenyl-pent-1-en-3-ol.**<sup>12</sup>

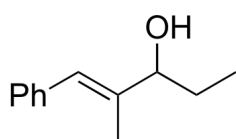

Using **GP2**: TLC:  $R_f = 0.30$  (25% EtOAc/hexanes, UV +  $\text{KMnO}_4$ ); column chromatography: Biotage, 0-25% EtOAc/hexanes; 42.3 mg (96% yield) colorless oil;  $^1\text{H}$  NMR (500 MHz,  $\text{CDCl}_3$ ):  $\delta$  0.94 (t,  $J = 8.0$  Hz, 3H), 1.64-1.70 (m, 2H), 1.73 (br, 1H), 1.85 (s, 3H), 4.10 (t,  $J = 6.5$  Hz, 1H), 6.48 (s, 1H), 7.19-7.34 (m, 5H);  $^{13}\text{C}$  NMR (125 MHz,  $\text{CDCl}_3$ ):  $\delta$  10.28, 13.27, 28.10, 79.74, 126.18, 126.60, 128.30, 129.16, 137.80, 140.24; HRMS (EI) calcd. for  $\text{C}_{12}\text{H}_{16}\text{O}$  ( $\text{M}^+$ ): 176.1201, found 176.1201; HPLC separation conditions: CHIRALCEL OD-H, 254 nm, 2.5% IPA/hexanes, 1.0 mL/min,  $t_R = 15.3$  and 16.9 min, 93% *ee*;  $[\alpha]_{589}^{20} = +10.1$  ( $c = 0.37$ ,  $\text{CHCl}_3$ ) (lit.  $[\alpha]_D^{20} = -10.67$  ( $c = 0.003$ ,  $\text{CHCl}_3$ ) for (*S*)-enantiomer)<sup>12</sup>.

**(S)-(+)-3-Ethyl-4-phenyl-but-3-en-2-ol.**

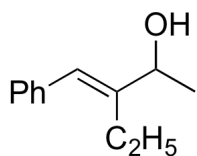

Using **GPI**: TLC:  $R_f = 0.29$  (25% EtOAc/hexanes, UV +  $\text{KMnO}_4$ ); column chromatography: Biotage, 0-25 % EtOAc/hexanes; 41.3 mg (94% yield) colorless viscous oil;  $^1\text{H}$  NMR (500 MHz,  $\text{CDCl}_3$ ):  $\delta$  1.13 (t,  $J = 7.5$  Hz, 3H), 1.41 (d,  $J = 6.5$  Hz, 3H), 1.56 (br, 1H), 2.25 (dt,  $J = 21.0$ , 7.5 Hz, 1H), 2.43 (dt,  $J = 21.5$ , 7.5 Hz, 1H), 4.43-4.48 (m, 1H), 6.56 (s, 1H), 7.21-7.36 (m, 5H);  $^{13}\text{C}$  NMR (125 MHz,  $\text{CDCl}_3$ ):  $\delta$  14.16, 21.51, 22.77, 71.83, 124.18, 126.63, 128.42, 128.81, 137.89, 148.14; HRMS(EI) calcd. for  $\text{C}_{12}\text{H}_{16}\text{O}$  ( $\text{M}^+$ ): 176.1201, found 176.1197; HPLC separation conditions: CHIRALCEL OD-H, 254 nm, 2% IPA/hexanes, 0.5 mL/min,  $t_R = 40.2$  and 42.3 min, 93% *ee*;  $[\alpha]_{589}^{20} = +8.8$  ( $c = 0.93$ ,  $\text{CHCl}_3$ ).

**(R)-(+)-3-Pentyl-4-phenyl-but-3-en-2-ol.**<sup>13</sup>

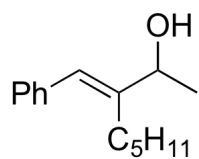

Using **GP2**: TLC:  $R_f$  = 0.13 (10% EtOAc/hexanes, UV +  $\text{KMnO}_4$ ); column chromatography: Biotage, 0-25 % EtOAc/hexanes; 50.1 mg (92% yield) colorless oil;  $^1\text{H}$  NMR (500 MHz,  $\text{CDCl}_3$ ):  $\delta$  0.83-0.91 (m, 3H), 1.23-1.37 (m, 4H), 1.39 (d,  $J$  = 6.5 Hz, 3H), 1.43-1.65 (m, 3H), 2.10-2.22 (m, 1H), 2.32-2.42 (m, 1H), 4.42 (q,  $J$  = 6.5 Hz, 1H), 6.55 (s, 1H), 7.18-7.27 (m, 3H), 7.36-7.38 (m, 2H);  $^{13}\text{C}$  NMR (125 MHz,  $\text{CDCl}_3$ ):  $\delta$  14.20, 22.55, 22.76, 28.65, 29.02, 32.40, 71.92, 124.32, 126.54, 128.35, 128.79, 137.98, 147.03; HRMS(EI) calcd. for  $\text{C}_{15}\text{H}_{22}\text{O}$  ( $\text{M}^+$ ): 218.1671, found 218.1667; HPLC separation conditions: CHIRALCEL OD-H, 254 nm, 2% IPA/hexanes, 1.0 mL/min,  $t_R$  = 14.2 and 15.6 min, 90% *ee*;  $[\alpha]_{589}^{20}$  = +15.8 ( $c$  = 1.05,  $\text{CHCl}_3$ ).

**(E)-3,4-diphenylbut-3-en-2-ol.**<sup>11</sup>

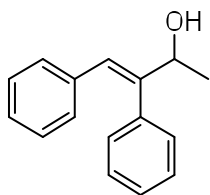

Using **GP2**: Isolated by column chromatography using 6% EtOAc in hexanes as a clear oil; 48 mg (85% yield);  $^1\text{H}$  NMR (400 MHz,  $\text{CDCl}_3$ ):  $\delta$  1.30 (d,  $J$  = 6.4 Hz, 3H), 1.75 (broad s, 1H), 4.67 (q,  $J$  = 6.4 Hz, 1H), 6.69 (s, 1H), 6.91–7.37 (m, 10H); HPLC separation conditions: CHIRALCEL OD-H, 254 nm, 4% IPA/hexanes; 0.5 mL/min,  $t_R$  = 22.9 and 24.5 min, 76 % *ee*.

**(Z)-3-Bromo-4-phenylbut-3-en-2-ol.**

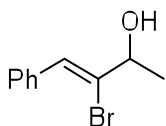

Using **GP2**: Isolated by column chromatography using 6% EtOAc in hexanes as a clear oil; 51 mg (91% yield);  $^1\text{H}$  NMR (500 MHz,  $\text{CDCl}_3$ ):  $\delta$  1.25 (s, 1H), 1.48 (d,  $J$  = 6 Hz, 3H), 4.49 (q,  $J$  = 6 Hz, 1H), 7.08 (s, 1H), 7.32 (t,  $J$  = 7 Hz, 1H), 7.37 (t,  $J$  = 7 Hz, 2H), 7.61 (d,  $J$  = 7 Hz, 2H);  $^{13}\text{C}$  NMR (125 MHz,  $\text{CDCl}_3$ ):  $\delta$  22.7, 73.8, 127.1, 128.3, 129.3, 129.3, 131.6, 135.3; HRMS(EI) calcd. for  $\text{C}_{10}\text{H}_9\text{BrO}$  ( $\text{M}^+$ ): 225.9993, found: 225.9983; HPLC separation conditions: CHIRALCEL OD-H, 254 nm, 5% IPA/hexanes; 0.5 mL/min,  $t_R$  = 14.0 and 15.1 min, 77 % *ee*.

**(S)-(+)-3-Methylnon-3-en-2-ol.**

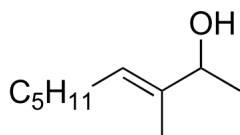

Using **GPI**: TLC:  $R_f$  = 0.17 (10% EtOAc/hexanes,  $\text{KMnO}_4$ ); column chromatography: Biotage, 0-10 % EtOAc/hexanes; 32.0 mg (82% yield) colorless oil;  $^1\text{H}$  NMR (500 MHz,  $\text{CDCl}_3$ ):  $\delta$  0.89 (t,  $J$  = 7.5 Hz, 3H), 1.25 (d,  $J$  = 7.0 Hz, 3H), 1.27-1.38 (m, 6H), 1.53 (br, 1H), 1.62 (s, 3H), 1.98-2.02 (m, 2H), 4.20 (q,  $J$  = 6.5 Hz, 1H), 5.38-5.42 (m, 1H);  $^{13}\text{C}$  NMR (125 MHz,  $\text{CDCl}_3$ ):  $\delta$  11.58, 14.26, 21.79, 22.78, 27.66, 29.40, 31.75, 73.67, 125.59, 138.48; HRMS(EI) calcd. for  $\text{C}_{10}\text{H}_{20}\text{O}$  ( $\text{M}^+$ ): 156.1514, found 156.1508; HPLC separation

conditions: CHIRALPAK AD-H, 210 nm, 1% IPA/hexanes, 1.3 mL/min,  $t_R$  = 11.1 and 11.8 min, 90% *ee*;  $[\alpha]_{589}^{20}$  = +7.5 ( $c$  = 0.27, CHCl<sub>3</sub>).

**(*R*)-(+)-4-(4-Methoxyphenyl)-3-methylbut-3-en-2-ol.**<sup>14</sup>

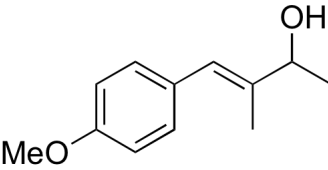 Using **GP2**: TLC:  $R_f$  = 0.23 (25% EtOAc/hexanes, UV + KMnO<sub>4</sub>); column chromatography: Biotage, 0-25% EtOAc/hexanes; 47.0 mg (98% yield) colorless oil; <sup>1</sup>H NMR (500 MHz, CDCl<sub>3</sub>):  $\delta$  1.36 (d,  $J$  = 6.0 Hz, 3H), 1.86 (br, 1H), 1.88 (s, 3H), 3.82 (s, 3H), 4.37 (q,  $J$  = 5.5 Hz, 1H), 6.45 (s, 1H), 6.89 (d,  $J$  = 7.0 Hz, 2H), 7.23 (d,  $J$  = 7.0 Hz, 2H); <sup>13</sup>C NMR (125 MHz, CDCl<sub>3</sub>):  $\delta$  13.48, 21.92, 55.40, 73.98, 113.72, 124.12, 130.30, 130.36, 140.10, 158.23; HRMS(EI) calcd. for C<sub>12</sub>H<sub>16</sub>O<sub>2</sub> (M<sup>+</sup>): 192.1150, found 192.1143; HPLC separation conditions: CHIRALCEL OB-H, 254 nm, 10% IPA/hexanes, 1.0 mL/min,  $t_R$  = 8.5 and 12.5 min, 89% *ee*;  $[\alpha]_{589}^{20}$  = +12.3 ( $c$  = 1.52, CHCl<sub>3</sub>) (lit.  $[\alpha]_D^{20}$  = -16.7 ( $c$  = 1.36, CHCl<sub>3</sub>) for (*S*)-enantiomer)<sup>15</sup>.

**(*R*)-(+)-4-(3-Methoxyphenyl)-3-methylbut-3-en-2-ol.**<sup>15</sup>

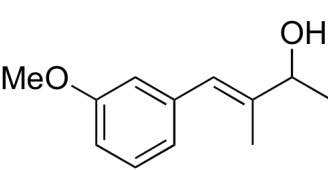 Using **GP2**: TLC:  $R_f$  = 0.19 (25% EtOAc/hexanes, UV + KMnO<sub>4</sub>); column chromatography: Biotage, 0-25 % EtOAc/hexanes; 46.6 mg (97% yield) colorless oil; <sup>1</sup>H NMR (500 MHz, CDCl<sub>3</sub>):  $\delta$  1.36 (d,  $J$  = 6.5 Hz, 3H), 1.85 (br, 1H), 1.88 (s, 3H), 3.80 (s, 3H), 4.36 (q,  $J$  = 6.5 Hz, 1H), 6.48 (s, 1H), 6.76-6.87 (m, 3H), 7.23-7.24 (m, 1H); <sup>13</sup>C NMR (125 MHz, CDCl<sub>3</sub>):  $\delta$  13.69, 21.95, 55.35, 73.75, 112.09, 114.73, 121.71, 124.40, 129.24, 139.24, 142.11, 159.51; HRMS(EI) calcd. for C<sub>12</sub>H<sub>16</sub>O<sub>2</sub> (M<sup>+</sup>): 192.1150, found 192.1147; HPLC separation conditions: CHIRALCEL OD-H, 254 nm, 5% IPA/hexanes, 1.0 mL/min,  $t_R$  = 16.9 and 20.9 min, 92% *ee*;  $[\alpha]_{589}^{20}$  = +9.7 ( $c$  = 1.33, CHCl<sub>3</sub>).

**(*R*)-(+)-3-Methyl-4-(*p*-tolyl)but-3-en-2-ol.**

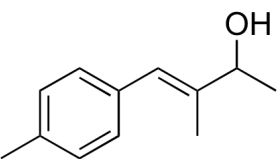 Using **GP2**: TLC:  $R_f$  = 0.32 (25% EtOAc/hexanes, UV + KMnO<sub>4</sub>); column chromatography: Biotage, 0-25% EtOAc/hexanes; 43.2 mg (98% yield) colorless oil; <sup>1</sup>H NMR (500 MHz, CDCl<sub>3</sub>):  $\delta$  1.38 (d,  $J$  = 6.5 Hz, 3H), 1.80 (br, 1H), 1.90 (s, 3H), 2.37 (s, 3H), 4.39 (q,  $J$  = 6.5 Hz, 1H), 6.50 (s, 1H), 7.16 (d,  $J$  = 8.0 Hz, 2H), 7.20 (d,  $J$  = 8.0 Hz, 2H); <sup>13</sup>C NMR (125 MHz, CDCl<sub>3</sub>):  $\delta$  13.54, 21.33, 21.92, 73.94, 124.50, 129.00, 129.05, 134.88, 136.23, 141.00; HRMS(EI) calcd. for C<sub>12</sub>H<sub>16</sub>O (M<sup>+</sup>): 176.1201, found 176.1205; HPLC

separation conditions: CHIRALPAK AD-H, 254 nm, 2% IPA/hexanes, 1.0 mL/min,  $t_R$  = 19.9 and 23.3 min, 90% *ee*;  $[\alpha]_{589}^{20}$  = +15.5 ( $c$  = 0.54,  $\text{CHCl}_3$ ).

**(R)-(+)-3-Methyl-4-(4-(trifluoromethyl)phenyl)but-3-en-2-ol.**

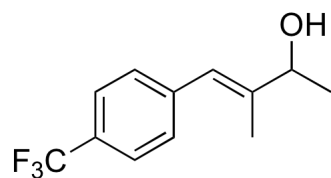

Using **GP2**: TLC:  $R_f$  = 0.22 (25% EtOAc/hexanes, UV +  $\text{KMnO}_4$ ); column chromatography: Biotage, 0-25% EtOAc/hexanes; 55.3 mg (96% yield) colorless oil;  $^1\text{H}$  NMR (500 MHz,  $\text{CDCl}_3$ ):  $\delta$  1.39 (d,  $J$  = 6.5 Hz, 3H), 1.88 (br, 1H), 1.89 (br, 3H), 4.40 (q,  $J$  = 6.0 Hz, 1H), 6.56 (s, 1H), 7.36 (d,  $J$  = 8.5 Hz, 2H), 7.58 (d,  $J$  = 8.0 Hz, 2H);  $^{13}\text{C}$  NMR (125 MHz,  $\text{CDCl}_3$ ):  $\delta$  13.86, 22.07, 73.47, 122.98, 124.27 (q,  $^1J_{\text{C-F}}$  = 270.1 Hz), 125.01 (q,  $^3J_{\text{C-F}}$  = 3.9 Hz), 128.30 (q,  $^2J_{\text{C-F}}$  = 32.1 Hz), 129.12, 141.34, 143.96; HRMS(EI) calcd. for  $\text{C}_{12}\text{H}_{13}\text{F}_3\text{O}$  ( $\text{M}^+$ ): 230.0918, found 230.0917; HPLC separation conditions: CHIRALCEL OD-H, 254 nm, 2% IPA/hexanes, 1.0 mL/min,  $t_R$  = 16.1 and 17.8 min, 93% *ee*;  $[\alpha]_{589}^{20}$  = +5.6 ( $c$  = 1.24,  $\text{CHCl}_3$ ).

**(R)-(+)-3-Methyl-4-(4-nitrophenyl)but-3-en-2-ol.**<sup>14</sup>

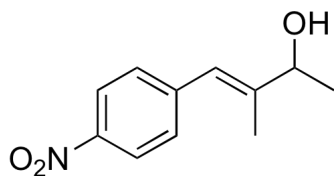

Using **GP2**: TLC:  $R_f$  = 0.30 (50% EtOAc/hexanes, UV +  $\text{KMnO}_4$ ); column chromatography: Biotage, 0-50 % EtOAc/hexanes; 45.6 mg (88% yield) yellow oil;  $^1\text{H}$  NMR (500 MHz,  $\text{CDCl}_3$ ):  $\delta$  1.40 (d,  $J$  = 6.5 Hz, 3H), 1.72 (br, 1H), 1.92 (s, 3H), 4.41 (q,  $J$  = 6.5 Hz, 1H), 6.61 (s, 1H), 7.42 (d,  $J$  = 8.0 Hz, 2H), 8.19 (d,  $J$  = 8.5 Hz, 2H);  $^{13}\text{C}$  NMR (125 MHz,  $\text{CDCl}_3$ ):  $\delta$  14.31, 22.19, 73.33, 122.55, 123.69, 129.75, 144.84, 146.15; HRMS(EI) calcd. for  $\text{C}_{11}\text{H}_{13}\text{NO}_3$  ( $\text{M}^+$ ): 207.0895, found 207.0902; HPLC separation conditions: CHIRALCEL OD-H, 254 nm, 5% IPA/hexanes, 1.0 mL/min,  $t_R$  = 18.3 and 20.4 min, 95% *ee*;  $[\alpha]_{589}^{20}$  = +1.2 ( $c$  = 0.45,  $\text{CHCl}_3$ ).

**(R)-(+)-4-(6-Bromobenzo[d][1,3]dioxol-5-yl)-3-methylbut-3-en-2-ol.**

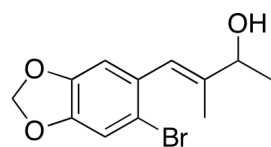

Using **GPI**: TLC:  $R_f$  = 0.24 (25% EtOAc/hexanes, UV +  $\text{KMnO}_4$ ); column chromatography: Biotage, 0-25% EtOAc/hexanes; 50.9 mg (99% yield) colorless viscous oil;  $^1\text{H}$  NMR (500 MHz,  $\text{CDCl}_3$ ):  $\delta$  1.37 (d,  $J$  = 7.0 Hz, 3H), 1.74 (s, 3H), 1.81 (br, 1H), 4.40 (q,  $J$  = 7.0 Hz, 1H), 5.98 (s, 2H), 6.41 (s, 1H), 6.74 (s, 1H), 7.03 (s, 1H);  $^{13}\text{C}$  NMR (125 MHz,  $\text{CDCl}_3$ ):  $\delta$  13.45, 21.97, 73.14, 101.86, 110.45, 112.71, 115.08, 124.10, 130.95, 142.76, 147.05, 147.24; HRMS(EI) calcd. for  $\text{C}_{12}\text{H}_{13}\text{BrO}_3$  ( $\text{M}^+$ ): 284.0048, found

284.0037; HPLC separation conditions: CHIRALCEL OD-H, 254 nm, 5% IPA/hexanes, 1.0 mL/min,  $t_R$  = 15.1 and 19.0 min, 62% *ee*;  $[\alpha]_{589}^{20} = +3.5$  ( $c = 0.74$ ,  $\text{CHCl}_3$ ).

**(*R*)-(+)-1-(cyclohex-1-en-1-yl)ethanol.**<sup>16,17</sup>

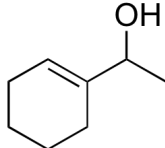 Using **GPI**: TLC:  $R_f = 0.22$  (30%  $\text{Et}_2\text{O}$ /pentane,  $\text{KMnO}_4$ ); column chromatography: 0-30%  $\text{Et}_2\text{O}$ /pentane; 32.0 mg (82% yield) colorless oil;  $^1\text{H}$  NMR (500 MHz,  $\text{CDCl}_3$ ):  $\delta$  1.26 (d,  $J = 6.5$  Hz, 3H), 1.41 (br, 1H), 1.53-1.70 (m, 4H), 1.94-2.08 (m, 4H), 4.17 (q,  $J = 7.0$  Hz, 1H), 5.67 (s, 1H);  $^{13}\text{C}$  NMR (125 MHz,  $\text{CDCl}_3$ ):  $\delta$  21.72, 22.81, 22.87, 23.88, 25.10, 72.40, 121.76, 141.46; GC separation conditions: Restek RT-BetaDEXcst (30 x 0.25 x 0.25  $\mu\text{m}$ ), carrier gas hydrogen, 1.0 mL/min, inlet  $T = 250$   $^\circ\text{C}$ , FID  $T = 270$   $^\circ\text{C}$ , oven  $T = 115$   $^\circ\text{C}$ ,  $t_R = 41.6$  and 44.2 min, 83% *ee*;  $[\alpha]_{589}^{20} = +19.7$  ( $c = 1.69$ ,  $\text{CHCl}_3$ ) (lit.  $[\alpha]_D^{20} = -7.4$  ( $c = 2.6$ ,  $\text{CHCl}_3$ ) for (*S*)-enantiomer)<sup>16</sup>.

**(*R*)-2,4,4-Trimethylcyclohex-2-enol.**<sup>18</sup>

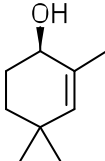 Using **GPI**: Isolated by column chromatography using 5%  $\text{EtOAc}$  in hexanes as a clear oil; 31 mg (90% yield);  $^1\text{H}$  NMR (400 MHz,  $\text{CDCl}_3$ ):  $\delta$  0.92 (s, 3H), 0.99 (s, 3H), 1.35-1.41 (m, 1H), 1.46-1.55 (m, 2H), 1.67-1.73 (m, 1H), 1.74 (s, 3H), 1.83-1.91 (m, 1H), 3.93 (t,  $J = 4.8$  Hz, 1H), 5.24 (s, 1H). GC separation conditions: CYCLOSIL-B column (30 x 0.25 x 0.25  $\mu\text{m}$ ), carrier gas hydrogen, 1.0 mL/min, inlet  $T = 250$   $^\circ\text{C}$ , FID  $T = 270$   $^\circ\text{C}$ , oven  $T = 70$   $^\circ\text{C}$ ,  $t_R = 37.5$  and 38.3 min, 95% *ee*;  $[\alpha]_{589}^{21} = +94.3$  ( $c = 0.79$ ,  $\text{CH}_3\text{OH}$ ) (lit.  $[\alpha]_{589.3}^{21} = +80.7$  ( $c = 1.05$ ,  $\text{CH}_3\text{OH}$ )).<sup>19</sup>

**3-Hydroxy-2-methylcyclohex-1-en-1-yl trifluoromethanesulfonate.**<sup>20</sup>

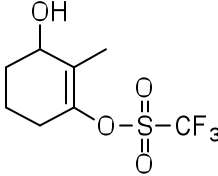 Using **GPI**: Isolated by column chromatography using 8%  $\text{EtOAc}$  in hexanes as a clear oil; 59 mg (90% yield);  $^{13}\text{C}$  NMR (100 MHz,  $\text{CDCl}_3$ ):  $\delta$  14.0, 18.7, 28.0, 31.2, 69.5, 121.1 (q,  $J = 121$  Hz), 128.3, 146.7; HPLC separation conditions: CHIRALCEL OD-H, 254 nm, 1% IPA/hexanes, 1.0 mL/min,  $t_R = 54.1$  and 57.0 min, 86% *ee*.

**(+)-*trans*-Pulegol.**<sup>21,22</sup>

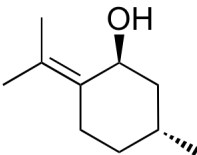 Using **GPI**: ((*S*)-DTBM-SEGPHOS was used instead):  $dr$  (*cis:trans*)<sup>23</sup> = 21:79; TLC:  $R_f$  ((+)-*cis*-pulegol) = 0.22,  $R_f$  ((+)-*trans*-pulegol) = 0.16 (20%  $\text{Et}_2\text{O}$ /pentane,  $\text{KMnO}_4$ ); column chromatography: 10-20%  $\text{Et}_2\text{O}$ /pentane; 26.6 mg (69% yield of *trans*, 33.9 mg – 88% overall yield) white crystals; recrystallized from pentane; mp = 75.5-76.5  $^\circ\text{C}$

(crystallized from pentane; lit. mp = 76 °C)<sup>21</sup>; <sup>1</sup>H NMR (500 MHz, CDCl<sub>3</sub>): δ 0.84-0.93 (m, 1H), 0.88 (d, *J* = 6.0 Hz, 3H), 1.11 (ddd, *J* = 14.0, 12.5, 3.0 Hz, 1H), 1.26 (br, 1H), 1.68 (d, *J* = 1.0 Hz, 3H), 1.71-1.77 (m, 1H), 1.75 (d, *J* = 2.0 Hz, 3H), 1.89-2.01 (m, 2H), 2.10-2.18 (m, 1H), 2.50 (dtd, *J* = 14.0, 3.5, 1.0 Hz, 1H), 4.85 (t, *J* = 2.5 Hz, 1H); <sup>13</sup>C NMR (125 MHz, CDCl<sub>3</sub>): 19.95, 20.65, 22.36, 25.01, 26.40, 35.83, 42.55, 67.09, 125.68, 132.61; HRMS(EI) calcd. for C<sub>10</sub>H<sub>18</sub>O (M<sup>+</sup>): 154.1358, found 154.1362; [α]<sub>D</sub><sup>20</sup> = +102.1 (*c* = 0.37, CHCl<sub>3</sub>; lit. [α]<sub>D</sub><sup>20</sup> = +100 (*c* = 1 in alcohol))<sup>21</sup>.

### (*S*)-2-Methylenecycloheptanol.

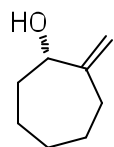

Using **GP2**: TLC: R<sub>f</sub> = 0.33 (25% EtOAc/hexanes, KMnO<sub>4</sub> stain); column chromatography on silica gel using 5% EtOAc/hexanes; 25.8 mg (82%) yellowish oil; <sup>1</sup>H NMR (400 MHz, CDCl<sub>3</sub>): δ 5.03 (t, *J* = 1.2 Hz, 1H), 4.90 (t, *J* = 1.2 Hz, 1H), 4.27 (dd, *J*<sub>1</sub> = 8 Hz, *J*<sub>2</sub> = 5.2 Hz, 1H), 2.33–2.28 (m, 1H), 2.22–2.16 (m, 1H), 2.05–1.98 (m, 1H), 1.77–1.24 (m, 8H);<sup>24</sup>

Enantiomeric excess and absolute stereochemistry were determined by Mosher ester analysis using the following procedure. 2-Methylenecycloheptanol (9.4 mg, 75 μmol) and (*R*)-Mosher acid (48 mg, 205 μmol) were dissolved in 1 mL (0.075 M) dichloromethane and stirred at rt until dissolved. Dicyclohexylcarbodiimide (50 mg, 242 μmol) and *N,N*-dimethylaminopyridine (29 mg, 237 μmol) were then added and the reaction progress was monitored by TLC until complete (3 h). The reaction mixture was diluted with Et<sub>2</sub>O, partitioned with water, extracted 3x with Et<sub>2</sub>O and the combined extracts dried over anhydrous MgSO<sub>4</sub>. The solvent was evaporated *in vacuo* and the residue dissolved in CDCl<sub>3</sub> to determine *ee*: 78% by comparison of OMe resonances at 3.56 ppm and 3.54 ppm. Shielding of the methylene protons within the major isomer indicated that the absolute stereochemistry is *S*.<sup>25</sup>

## VI. Tandem 1-pot asymmetric 1,2-reduction of an enone followed by 1,4-reduction of an enoate

A conical 3 mL microwave vial containing a conical stir bar was charged with fine powdered  $\text{Cu}(\text{OAc})_2 \cdot \text{H}_2\text{O}$  (1.3 mg, 3 mol %, 7.5  $\mu\text{mol}$ ) and (*R*)-DTBM-SEGPPOS (8.8 mg, 3 mol %, 7.5  $\mu\text{mol}$ ). The vial was capped with a rubber septum and the mixture placed under an atmosphere of Argon.  $\text{Et}_2\text{O}$  (0.4 mL) was added via syringe. At rt, DEMS (120  $\mu\text{L}$ , 0.75 mmol) was introduced, resulting in a brown solution after 10 min. The vial was then placed into a pre-cooled acetone bath at  $-25\text{ }^\circ\text{C}$  and stirred for additional 5 min. A pre-cooled solution of enone **1** (40.1 mg, 0.25 mmol) and enoate **21** (47.6 mg, 0.25 mmol) in  $\text{Et}_2\text{O}$  was slowly introduced *via* syringe. The side of the reaction vial was carefully rinsed with  $\text{Et}_2\text{O}$  (2 x 100  $\mu\text{L}$ ). After 5 h an aliquot of the reaction mixture was taken and GC/MS analysis confirmed full consumption of enone **1**. Subsequent addition of *t*-BuOH (1 M solution in  $\text{Et}_2\text{O}$ , 275  $\mu\text{L}$ ) and DEMS (40  $\mu\text{L}$ ) led to full conversion of enoate **21**, as confirmed through GC/MS analysis after additional 5 h at  $-25\text{ }^\circ\text{C}$ . The reaction was quenched at  $-25\text{ }^\circ\text{C}$  by the addition of 0.5 mL sat.  $\text{NH}_4\text{F}/\text{MeOH}$ . The reaction vial was removed from the cooling bath and warmed to rt. After filtration through  $\text{SiO}_2$ , the solvent was evaporated *in vacuo* and the crude reaction mixture purified by column chromatography on silica gel (Biotage, 0-10%  $\text{EtOAc}/\text{hexanes}$ ).

Allylic alcohol **2** - TLC  $R_f = 0.09$  (10%  $\text{EtOAc}/\text{hexanes}$ , UV +  $\text{KMnO}_4$ ); 38.9 mg (96% yield) colorless viscous oil; HPLC separation conditions: CHIRALCEL OD-H, 254 nm, 5% IPA/hexanes, 1.0 mL/min,  $t_R = 9.4$  and 10.5 min, 90% *ee*; spectral data matches previously reported data.<sup>26</sup>

Ester **22** - TLC  $R_f = 0.37$  (10%  $\text{EtOAc}/\text{hexanes}$ , UV +  $\text{KMnO}_4$ ); 45.2 mg (94% yield) colorless viscous oil; HPLC separation conditions: CHIRALCEL OB-H, 206 nm, 1% IPA/hexanes, 1.0 mL/min,  $t_R = 7.6$  and 9.4 min, 97% *ee*; spectral data matches previously reported data.

26

## VII. Characterization data

- 
- <sup>1</sup> Yanagisawa, A.; Goudu, R.; Arai, T. *Org. Lett.* **2004**, *6*, 4281.
- <sup>2</sup> Tanaka, J.; Kobayashi, H.; Kanemasa, S.; Tsuge, O. *Bull. Chem. Soc. Jpn.* **1989**, *62*, 1193.
- <sup>3</sup> Kim, K.-M.; Park, I.-H. *Synthesis* **2004**, 264.
- <sup>4</sup> Dieter, K. R.; Nice, L. E.; Velu E. S. *Tetrahedron Lett.* **1996**, *37*, 2377.
- <sup>5</sup> Lu, S.-M.; Bolm, C. *Angew. Chem., Int. Ed.* **2008**, *47*, 8920.
- <sup>6</sup> Tanaka, M.; Oota, O.; Hiramatsu, H.; Fujiwara, K. *Bull. Chem. Soc. Jpn.* **1988**, *61*, 2473.
- <sup>7</sup> Scheiper, B.; Bonnekessel, M.; Krause, H.; Fürstner, A. *J. Org. Chem.* **2004**, *69*, 3943.
- <sup>8</sup> Barrack, S. A.; Okamura, W. H. *J. Org. Chem.* **1986**, *51*, 3201.
- <sup>9</sup> Mori, M. *Bull. Chem. Soc. Jpn.* **2004**, *77*, 1655.
- <sup>10</sup> Chen, T.; Jiang, J.-J.; Xu, Q.; Shi, M. *Org. Lett.* **2007**, *9*, 865.
- <sup>11</sup> Liu, Z.-Q.; Sun, L.; Wang, J.-G.; Han, J.; Zhao, Y.-K.; Zhou, B. *Org. Lett.* **2009**, *11*, 1437.
- <sup>12</sup> Lurain, A. E.; Maestri, A.; Kelly, A. R.; Carroll, P. J.; Walsh, P. J. *J. Am. Chem. Soc.* **2004**, *126*, 13608.
- <sup>13</sup> Zhang, X.; Lu, Z.; Fu, C.; Ma, S. *Org. Biomol. Chem.* **2009**, *7*, 3258.
- <sup>14</sup> Xue, D.; Chen, Y.-C.; Cui, X.; Wang, Q.-W.; Zhu, J.; Deng, J.-G. *J. Org. Chem.* **2005**, *70*, 3584.
- <sup>15</sup> Zagazda, M.; Plenkiewicz, J. *Tetrahedron: Asymmetry* **2006**, *17*, 1958.
- <sup>16</sup> Jacquet, O.; Legros, J.-Y.; Coliboeuf, M.; Fiaud, J.-C. *Tetrahedron* **2008**, *64*, 6530.
- <sup>17</sup> Due to volatility of the product, the reaction was performed on 1.00 mmol scale.
- <sup>18</sup> Mori, K.; Puapoomchareon, P. *Liebigs Ann. Chem.* **1991**, 1053.
- <sup>19</sup> Ohkuma, T.; Hattori, T.; Ooka, H.; Inoue, T.; Noyori, R. *Org. Lett.* **2004**, *6*, 2681.
- <sup>20</sup> Kamijo, S.; Dudley, G. B. *J. Am. Chem. Soc.* **2006**, *128*, 6499.
- <sup>21</sup> Killen Macbeth, A.; Shannon, J. S. *J. Chem. Soc.* **1952**, 4748.
- <sup>22</sup> *trans*-Stereochemistry was confirmed through X-ray analysis.
- <sup>23</sup> Determined through <sup>1</sup>H NMR analysis of crude material.
- <sup>24</sup> Masamune, T.; Sato, S.; Abiko, A.; Ono, M.; Murai, A. *Bull. Chem. Soc. Jpn.* **1980**, *53*, 2895.
- <sup>25</sup> (a) Hoye, T. R.; Jeffrey, C. J.; Shao, F. *Nat. Protoc.* **2007**, *2*, 2451. (b) Dale, J. A.; Mosher, H. S. *J. Am. Chem. Soc.* **1973**, *95*, 512.
- <sup>26</sup> Oi, S.; Taira, A.; Honma, Y.; Sato, T.; Inoue, Y. *Tetrahedron: Asymmetry* **2006**, *17*, 598.

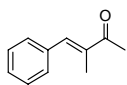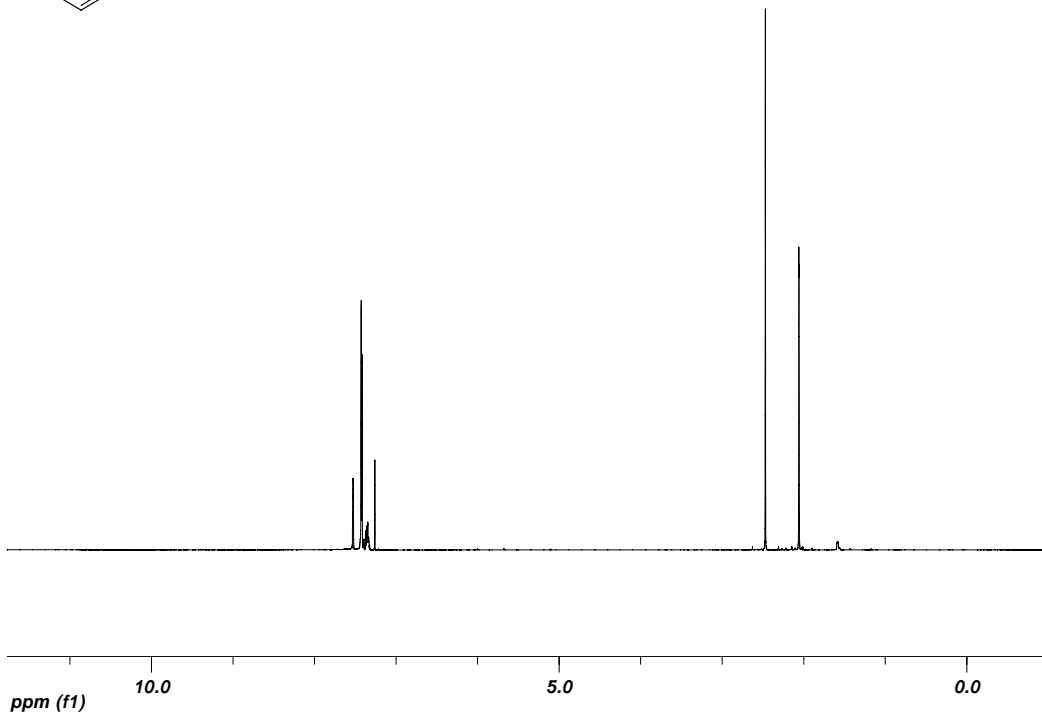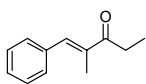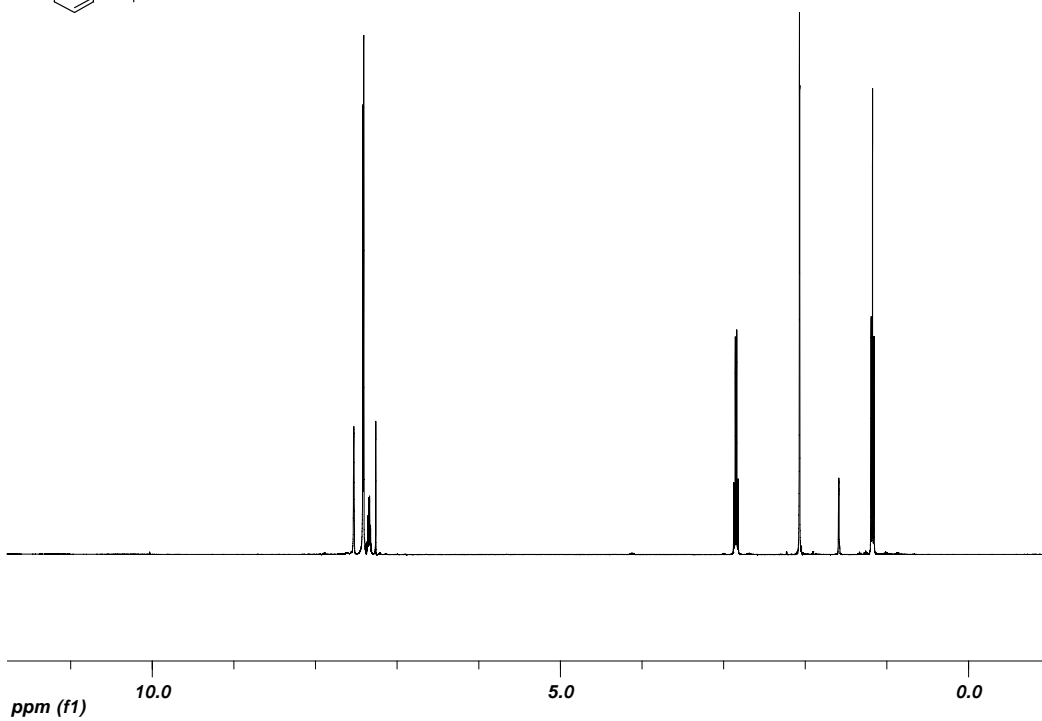

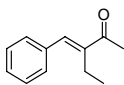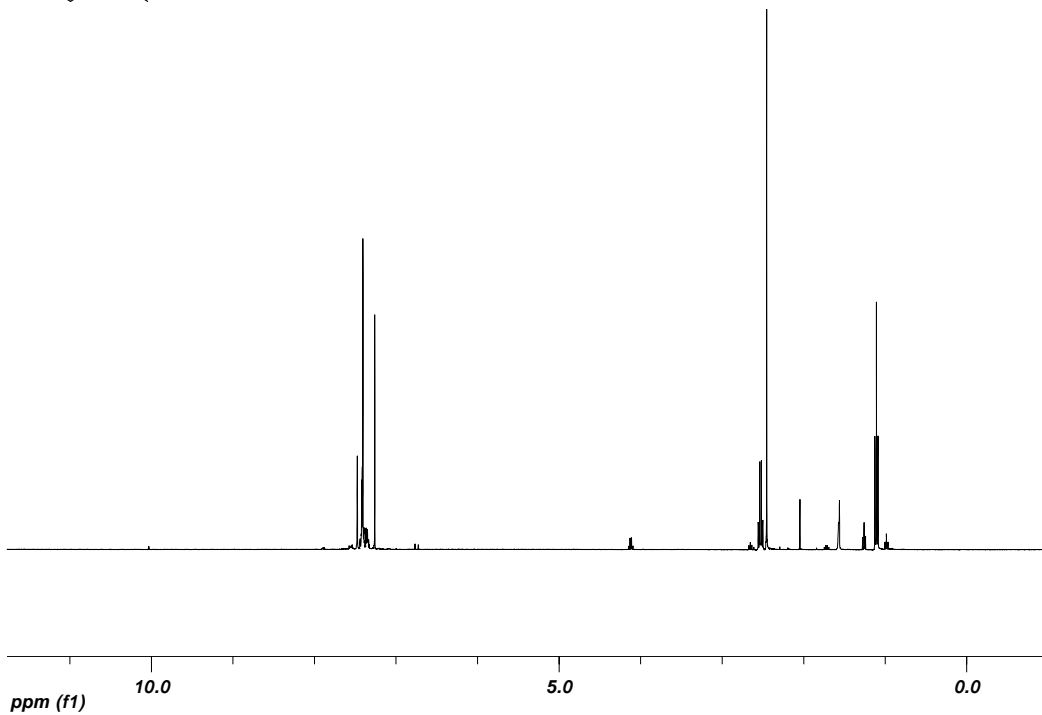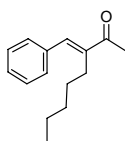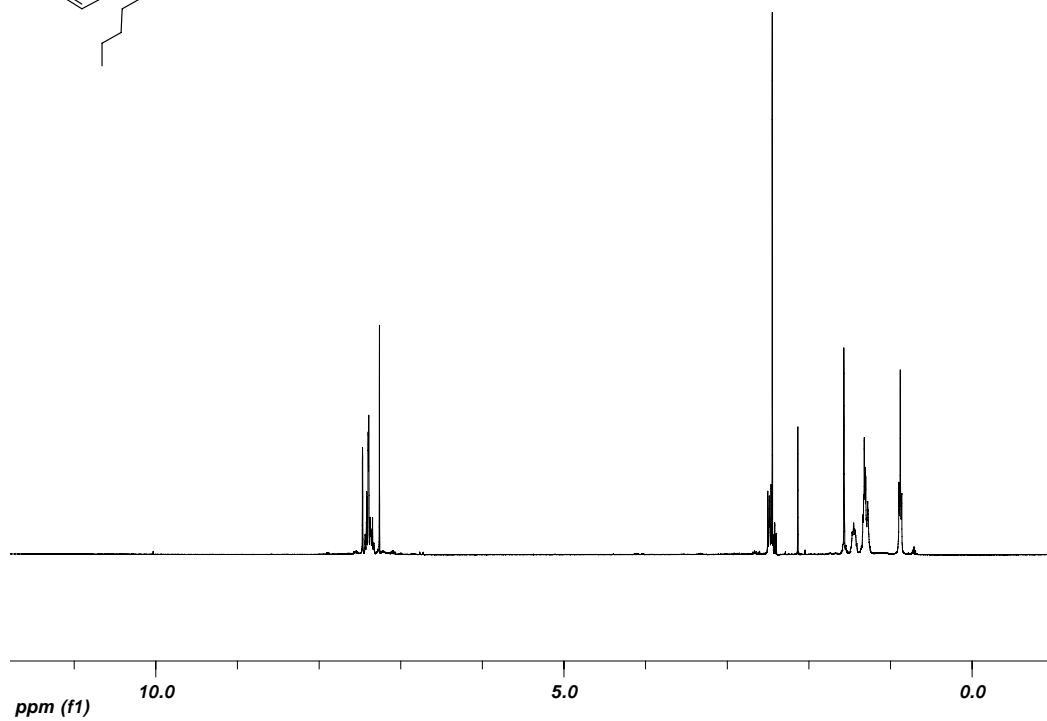

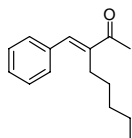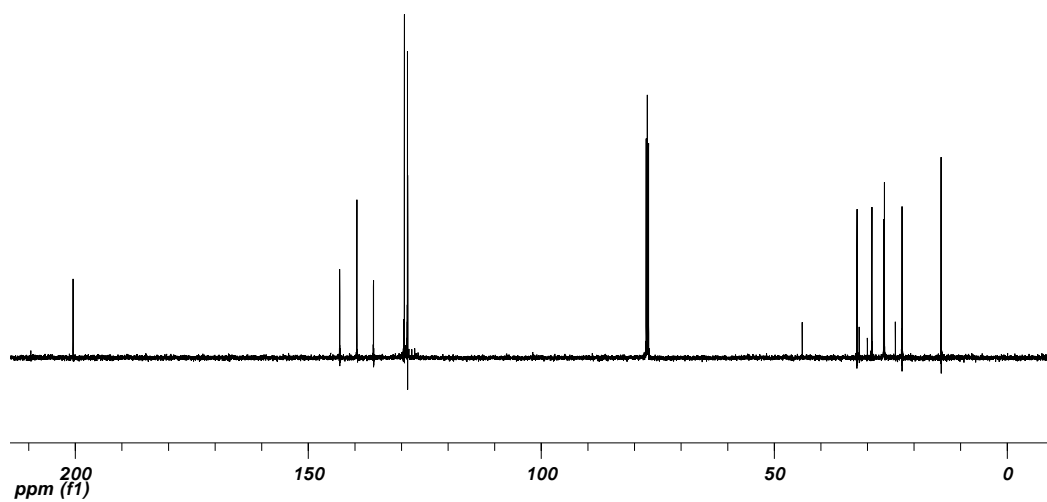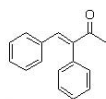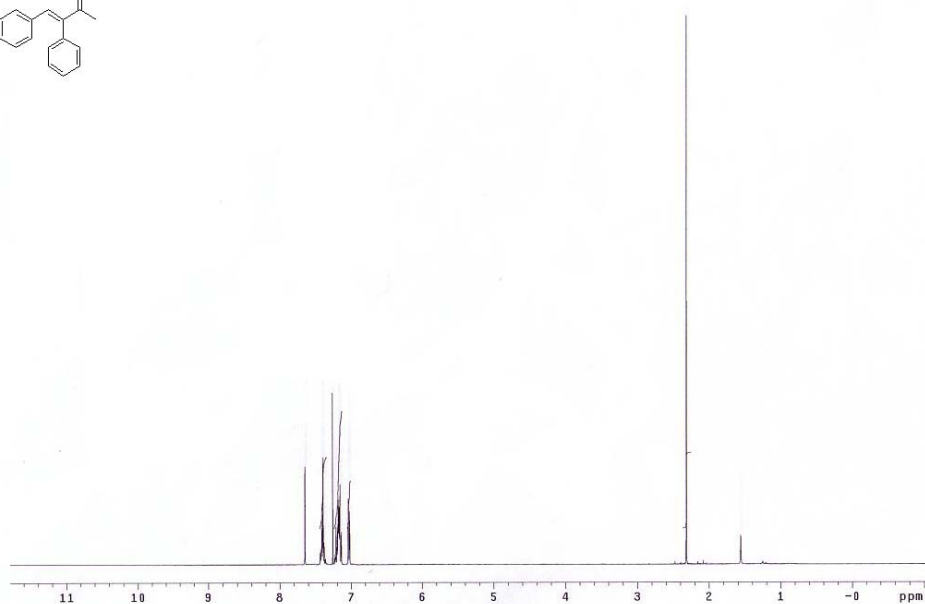

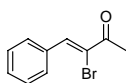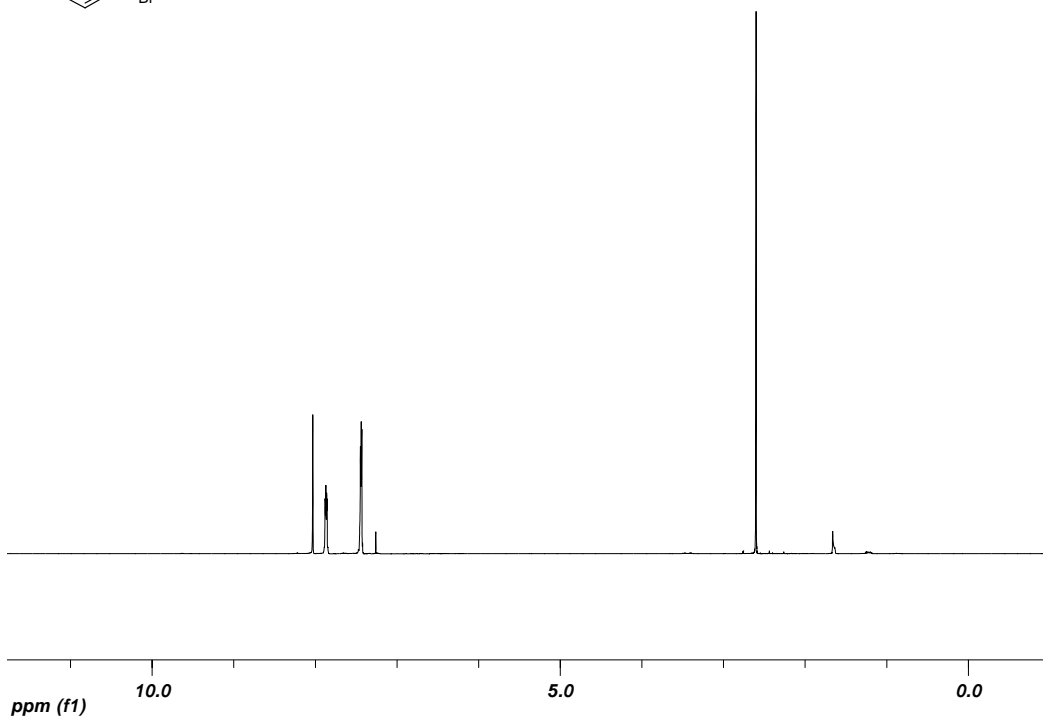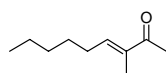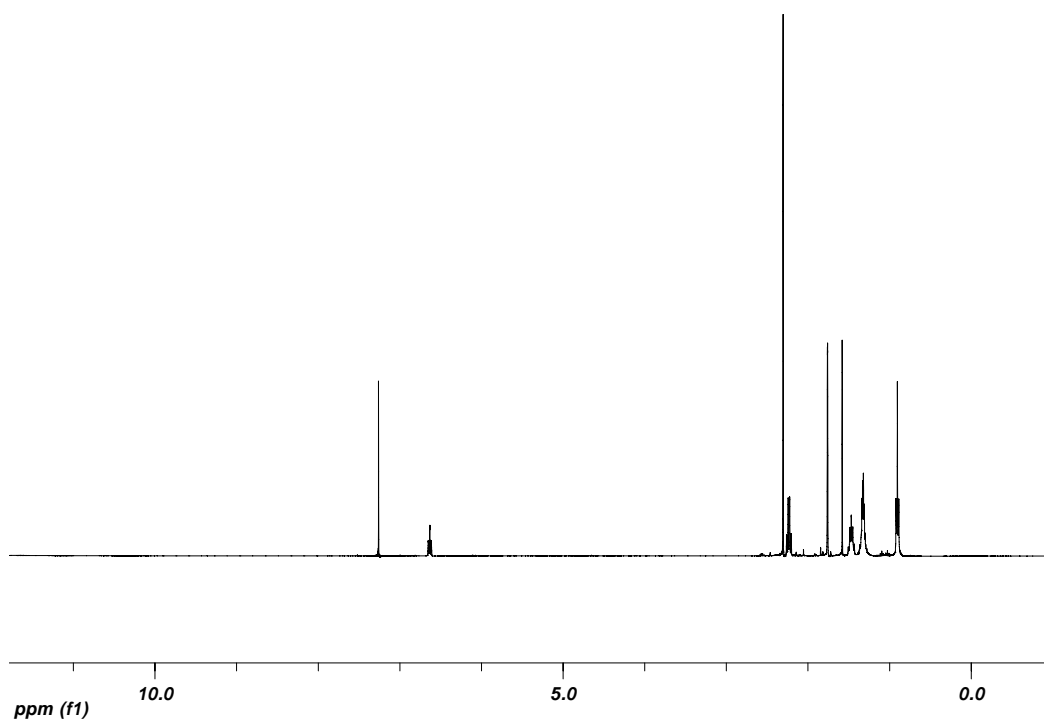

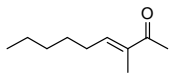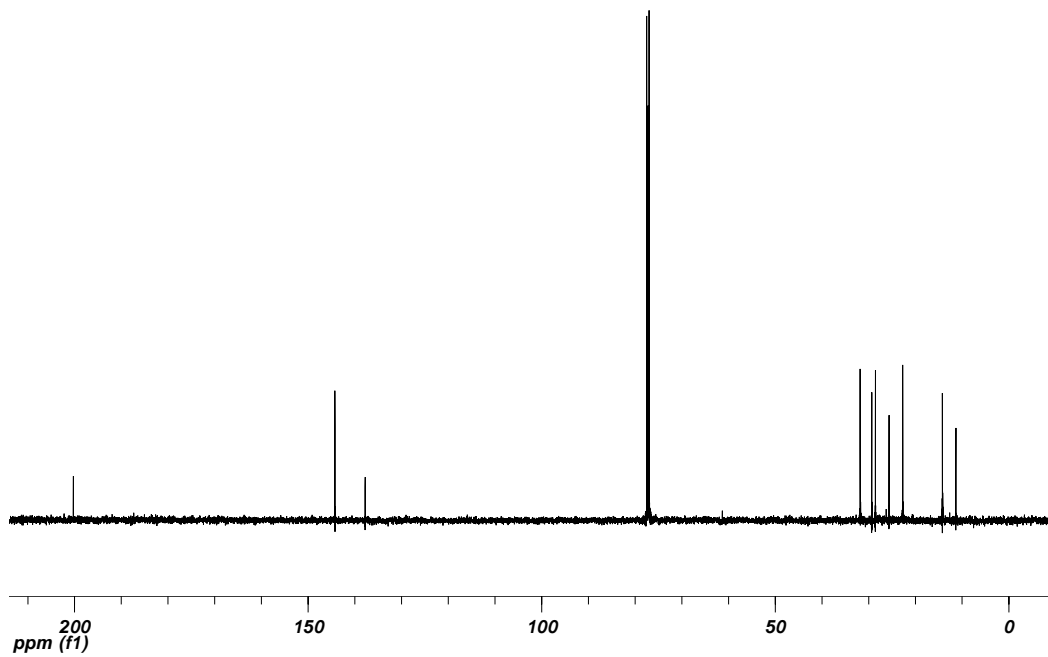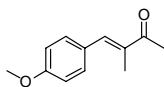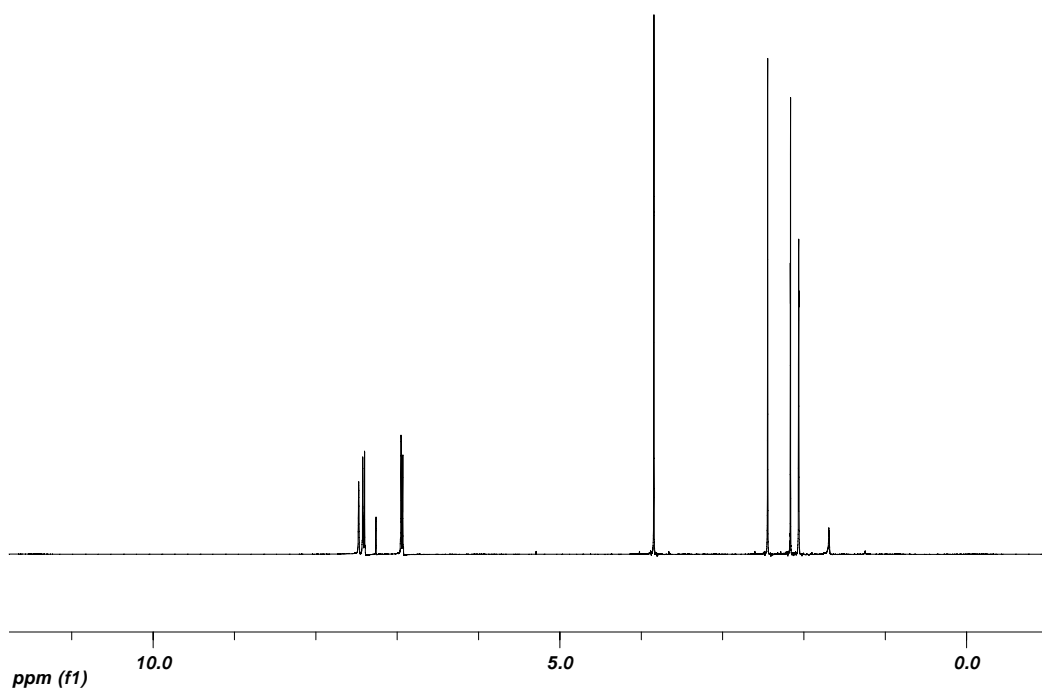

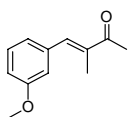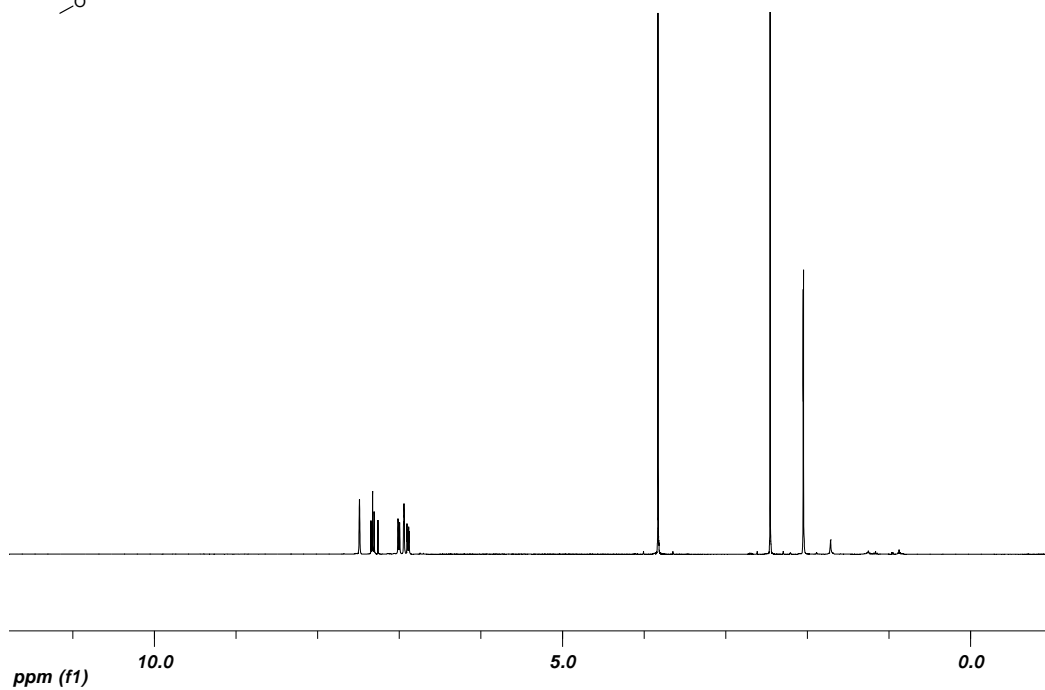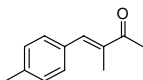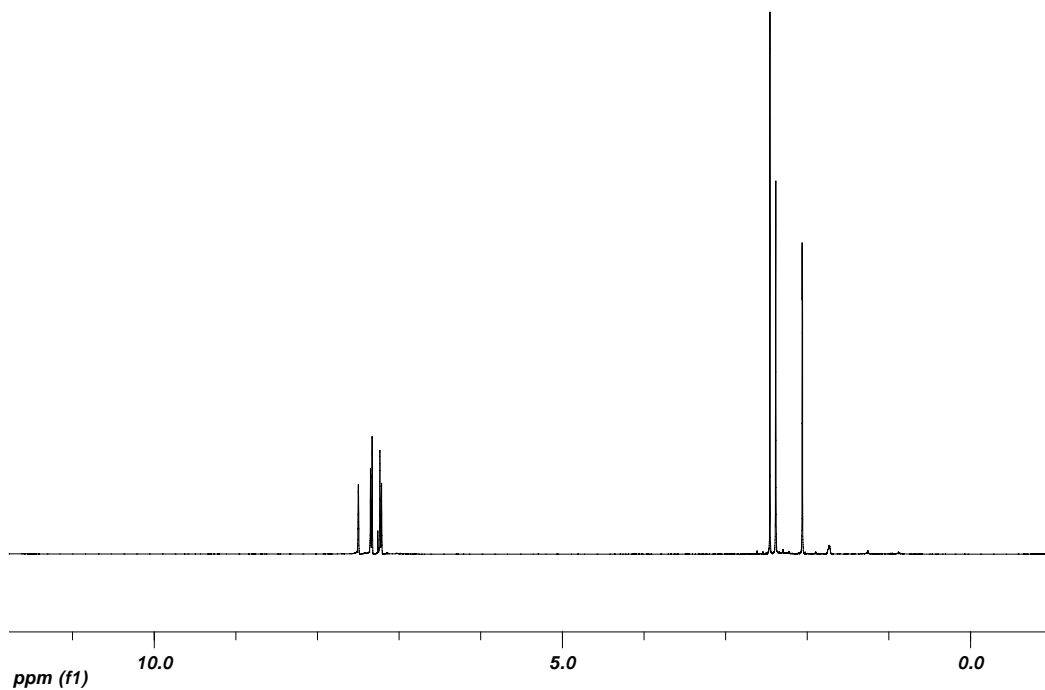

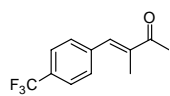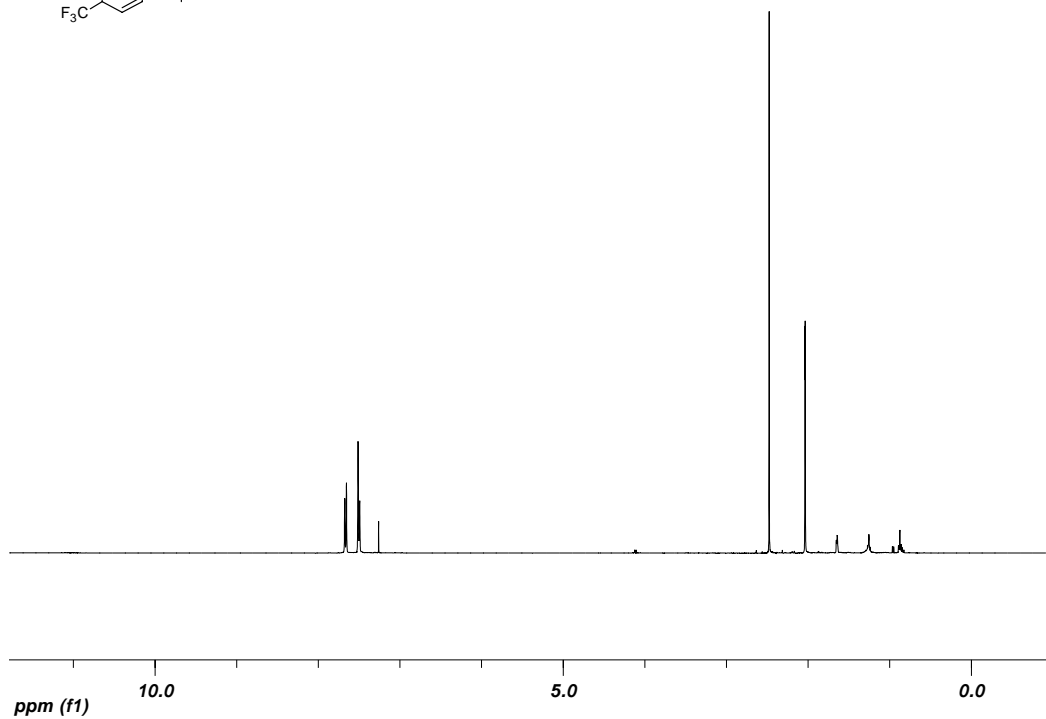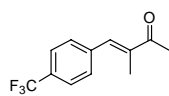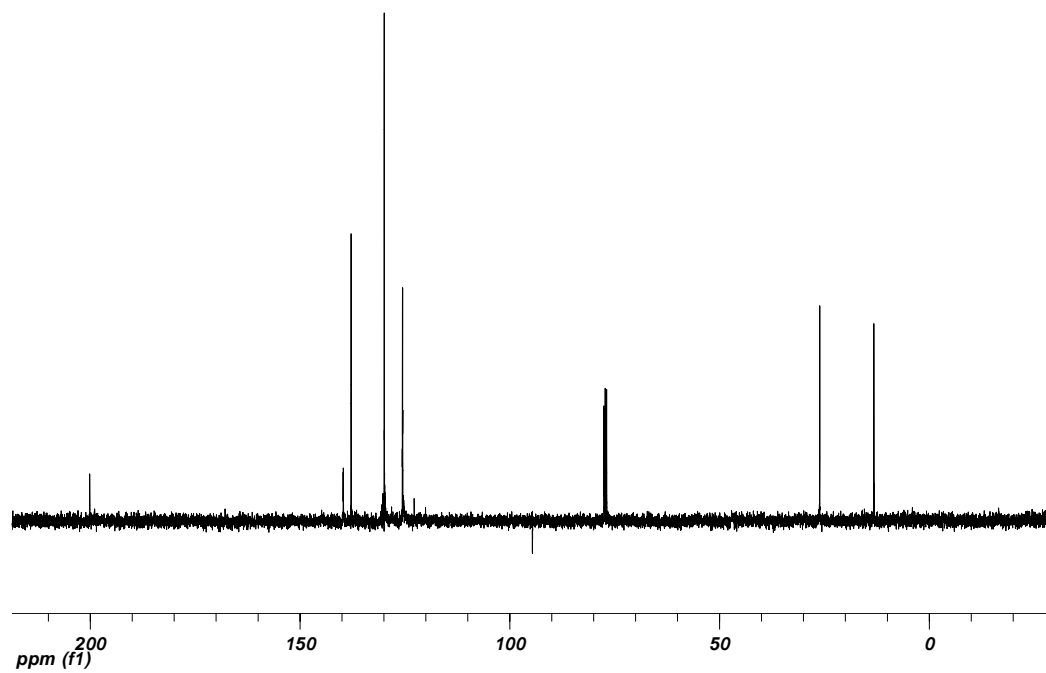

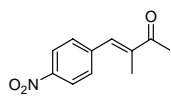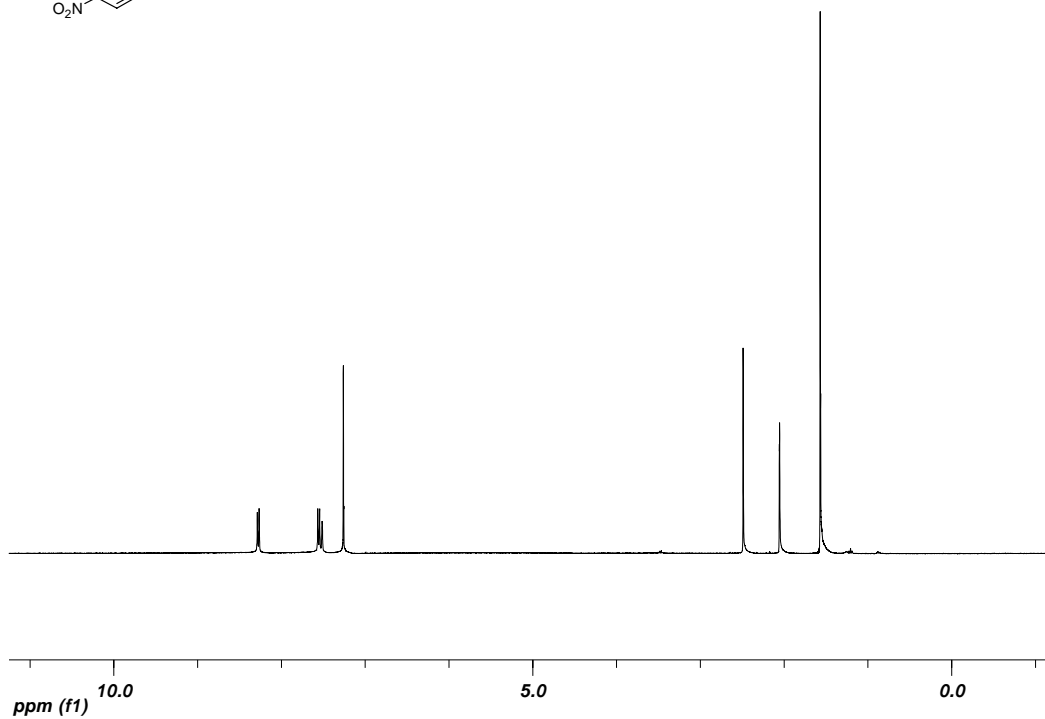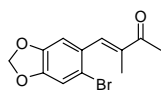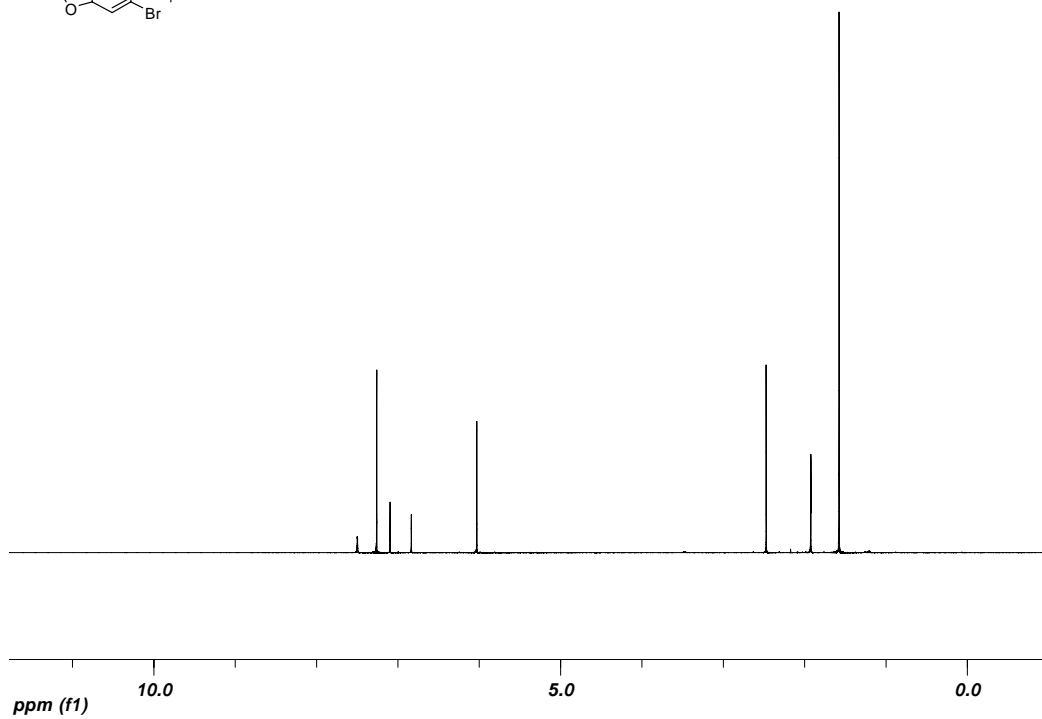

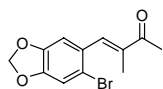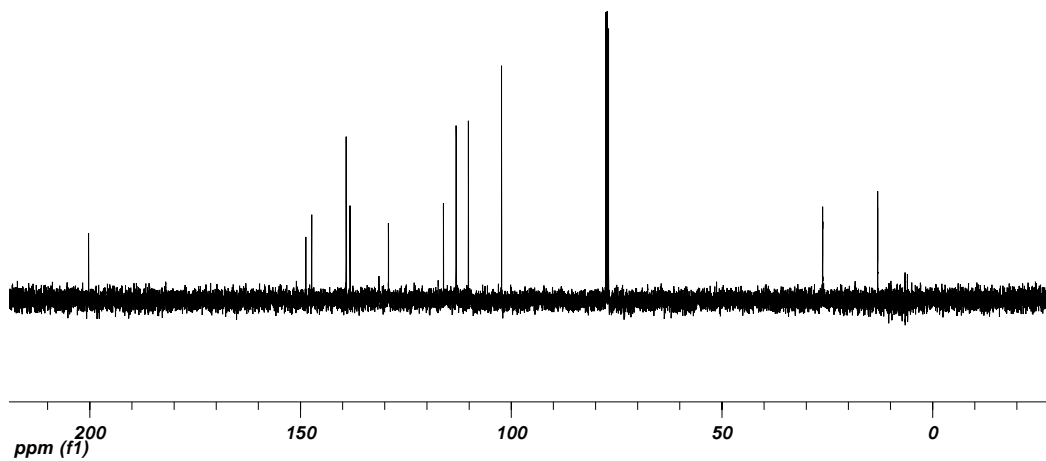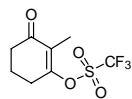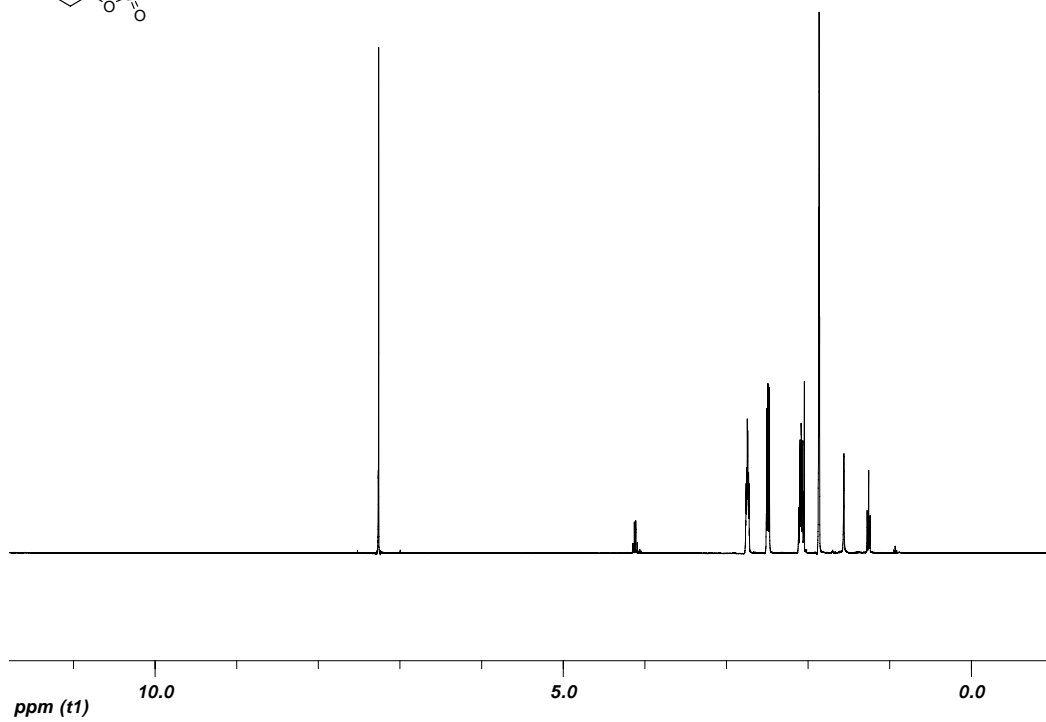

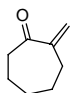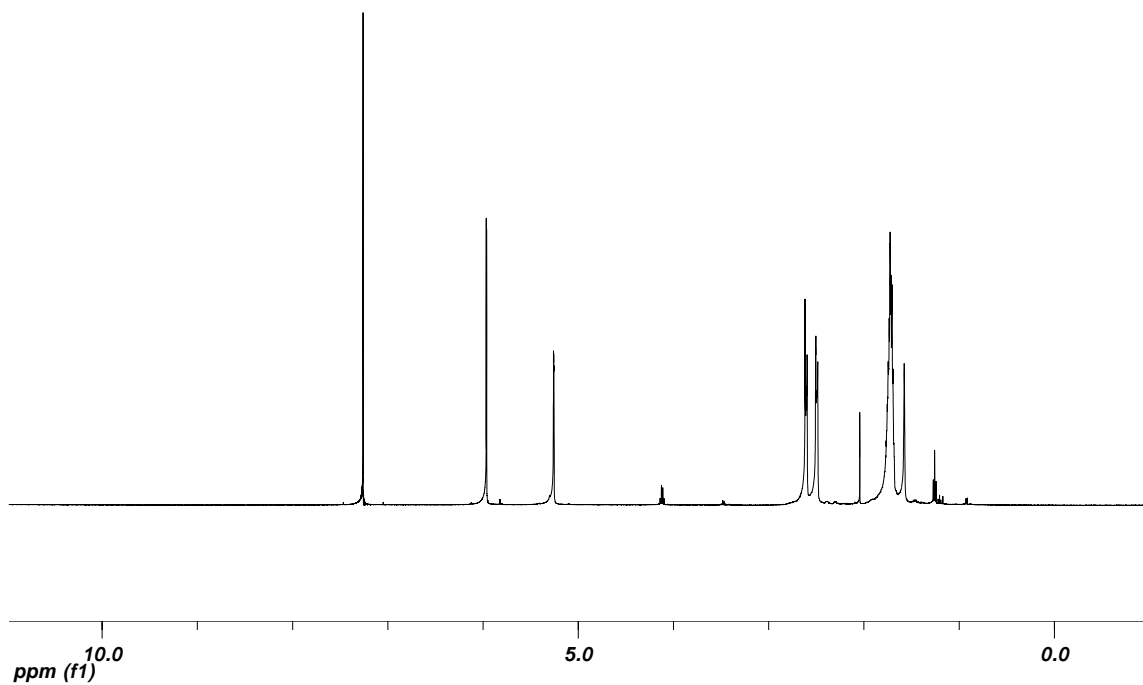

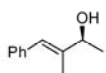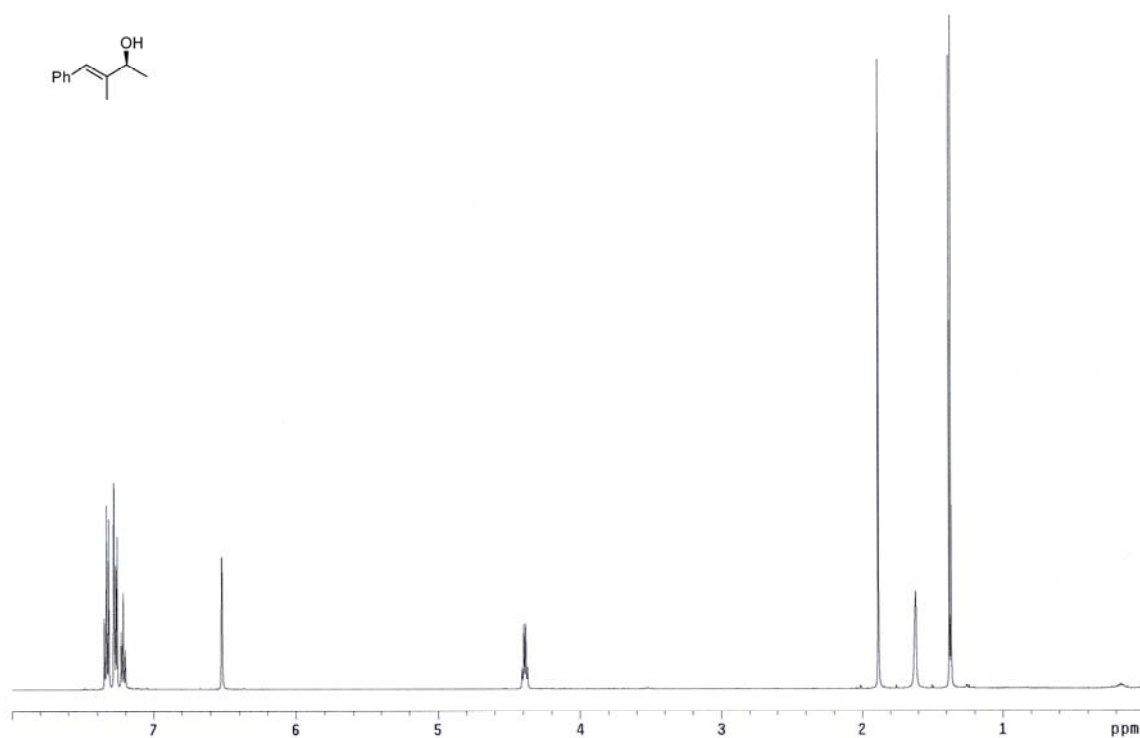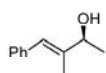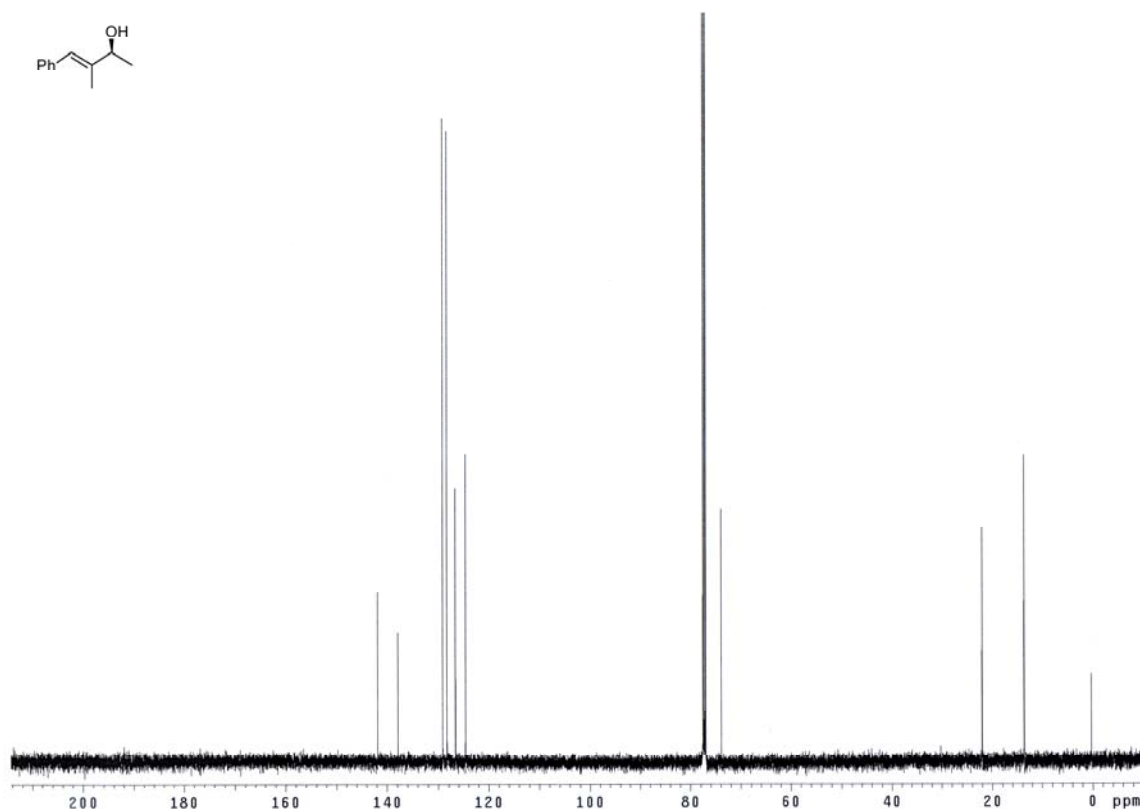

column: CHIRALCEL OD-H (serial ODH0CE-L1108), 0.46 x 25 cm  
 conditions: 5% IPA/hexanes, 1.0 mL/min

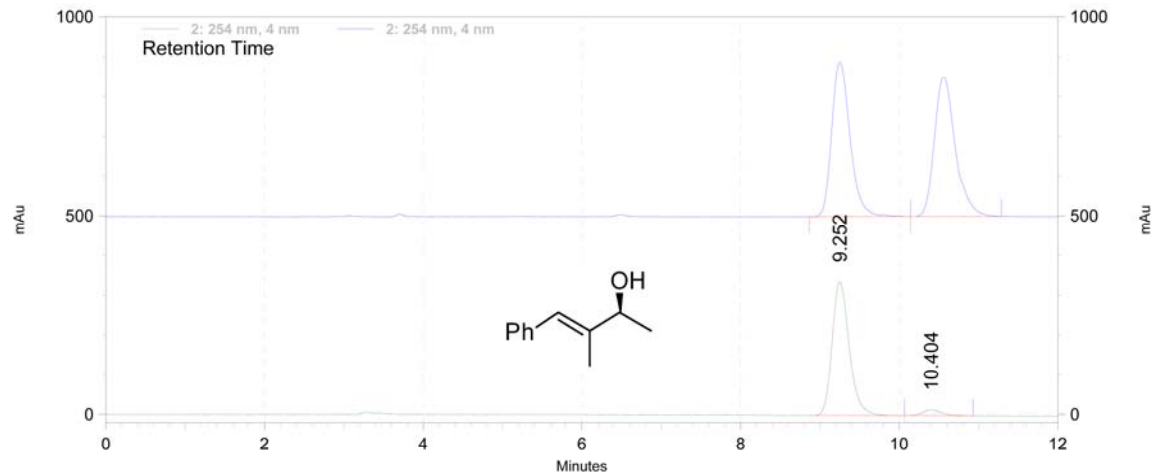

racemic mixture

**2: 254 nm, 4 nm Results**

| Retention Time | Area     | Area % |
|----------------|----------|--------|
| 9.452          | 18687789 | 49.35  |
| 10.760         | 19177710 | 50.65  |
| Totals         | 37865499 | 100.00 |

chiral experiment

**2: 254 nm, 4 nm Results**

| Retention Time | Area     | Area % |
|----------------|----------|--------|
| 9.252          | 12585252 | 95.51  |
| 10.404         | 591835   | 4.49   |
| Totals         | 13177087 | 100.00 |

RM609 CA

91% *ee*

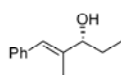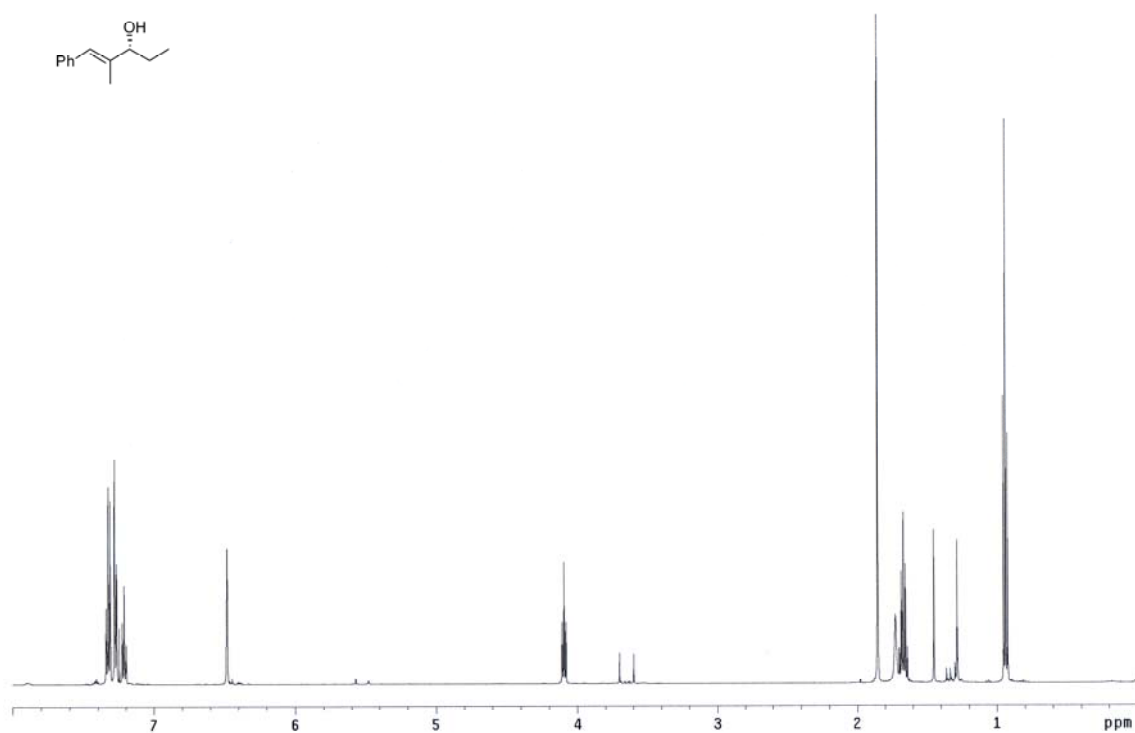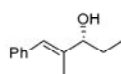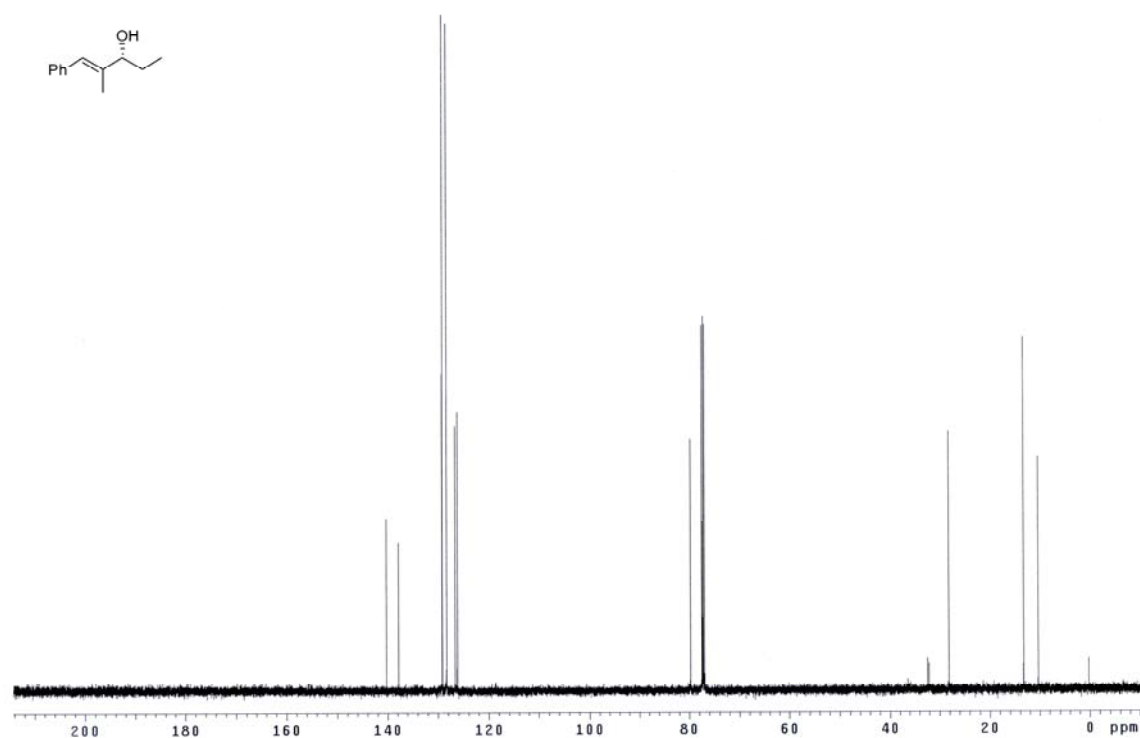

column: CHIRALCEL OD-H (serial ODH0CE-L1108), 0.46 x 25 cm  
 conditions: 2.5% IPA/hexanes, 1.0 mL/min

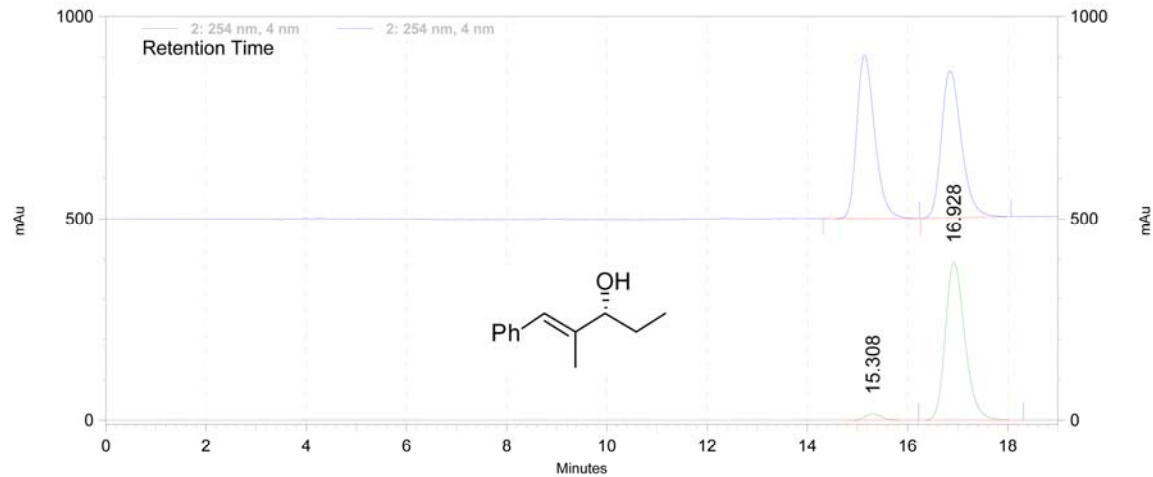

racemic mixture

**2: 254 nm, 4 nm Results**

| Retention Time | Area     | Area % |
|----------------|----------|--------|
| 15.640         | 25130215 | 49.96  |
| 17.348         | 25170091 | 50.04  |
| Totals         | 50300306 | 100.00 |

chiral experiment

**2: 254 nm, 4 nm Results**

| Retention Time | Area     | Area % |
|----------------|----------|--------|
| 15.308         | 752500   | 3.44   |
| 16.928         | 21146504 | 96.56  |
| Totals         | 21899004 | 100.00 |

**RM769 CA**

**93% ee**

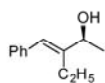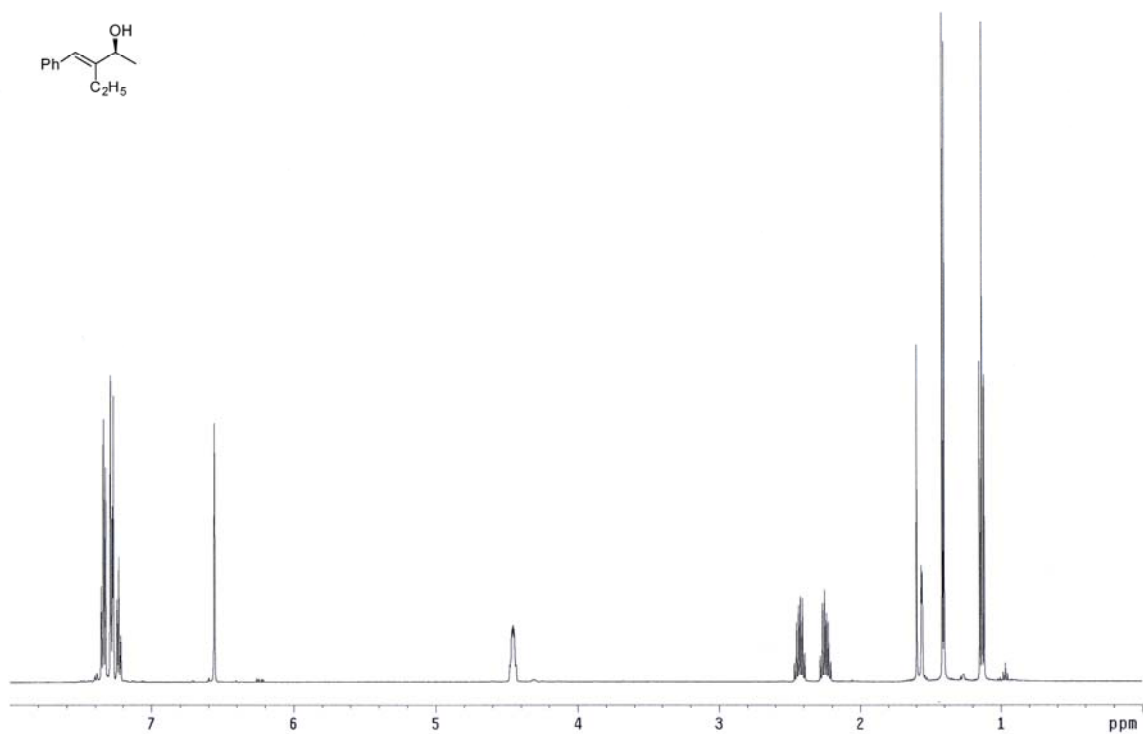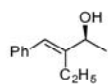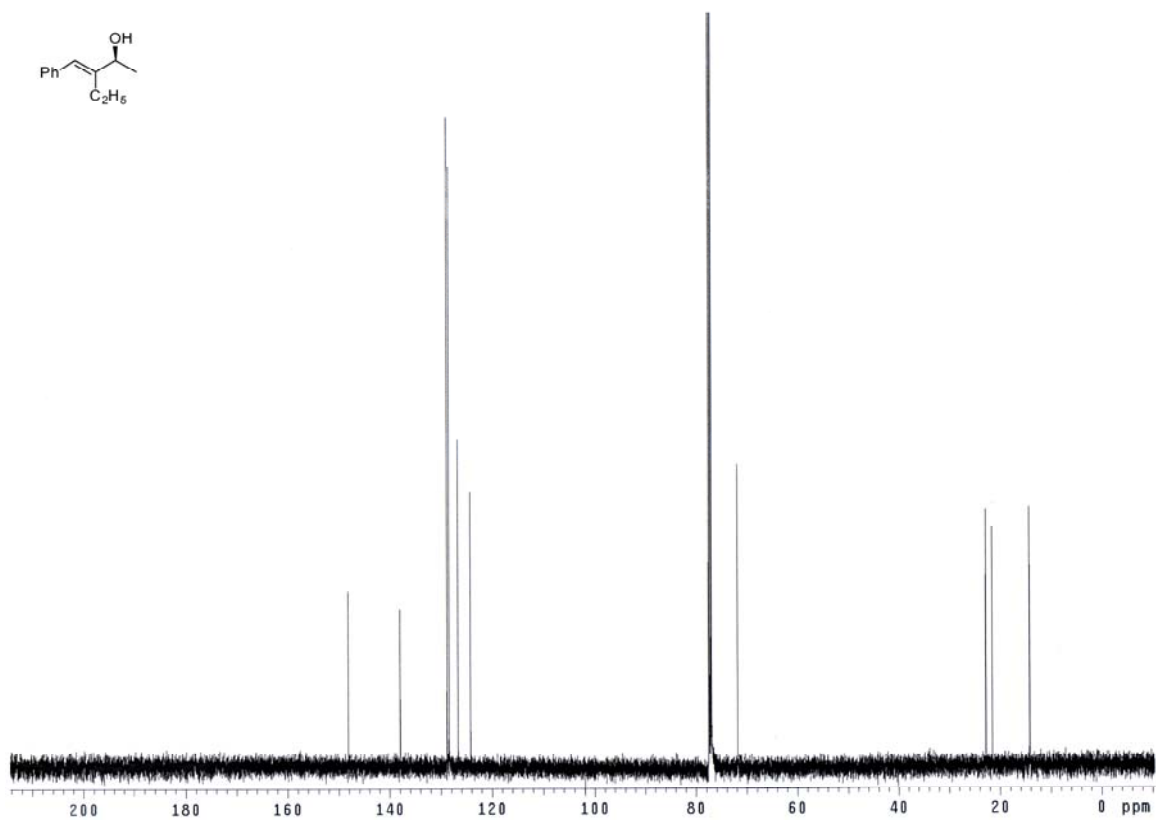

column: CHIRALCEL OD-H (serial ODH0CE-L1108), 0.46 x 25 cm  
 conditions: 2% IPA/hexanes, 0.5 mL/min

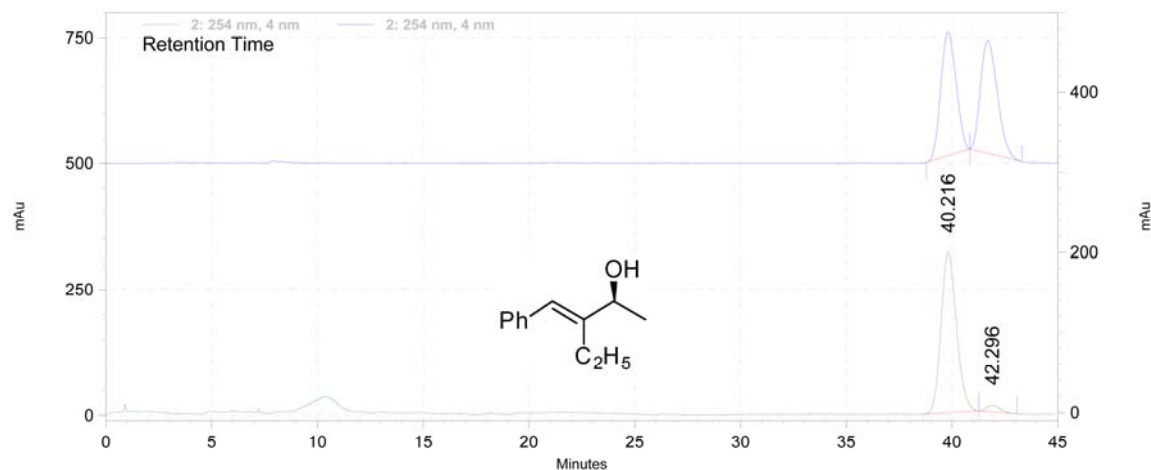

racemic mixture

**2: 254 nm, 4 nm Results**

| Retention Time | Area     | Area % |
|----------------|----------|--------|
| 39.808         | 24939545 | 50.06  |
| 41.688         | 24877024 | 49.94  |
| Totals         | 49816569 | 100.00 |

chiral experiment

**2: 254 nm, 4 nm Results**

| Retention Time | Area     | Area % |
|----------------|----------|--------|
| 40.216         | 10154345 | 96.51  |
| 42.296         | 367402   | 3.49   |
| Totals         | 10521747 | 100.00 |

RM655 CA

93% ee

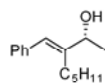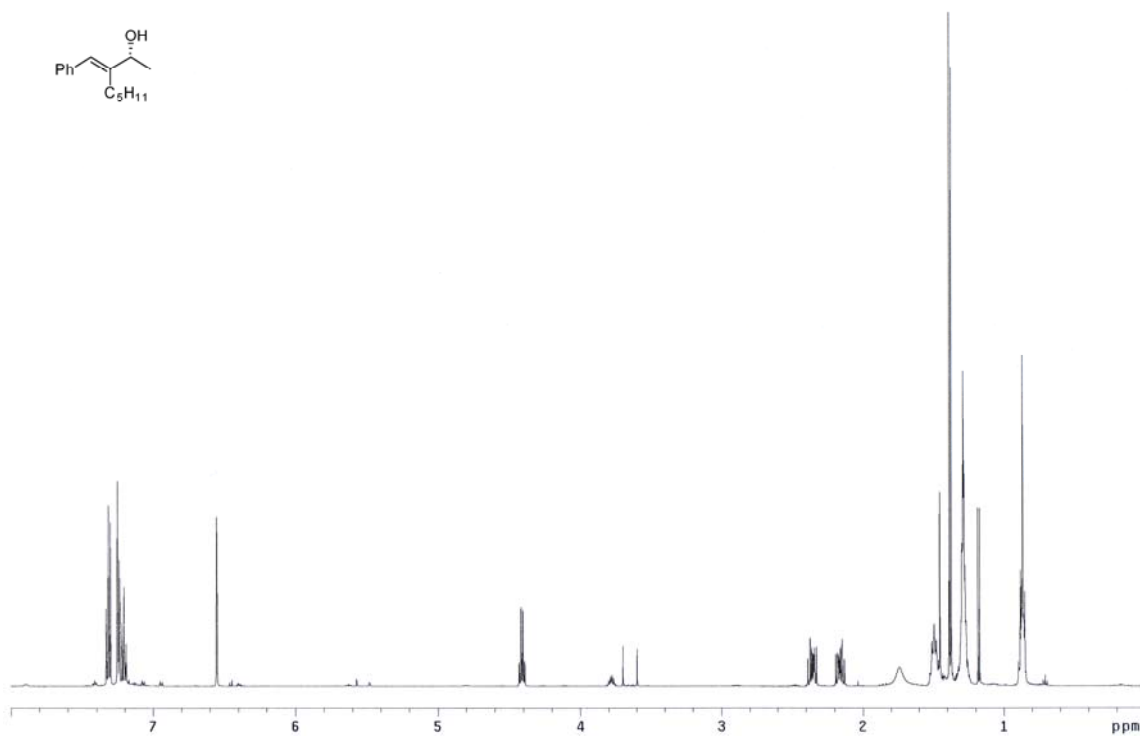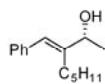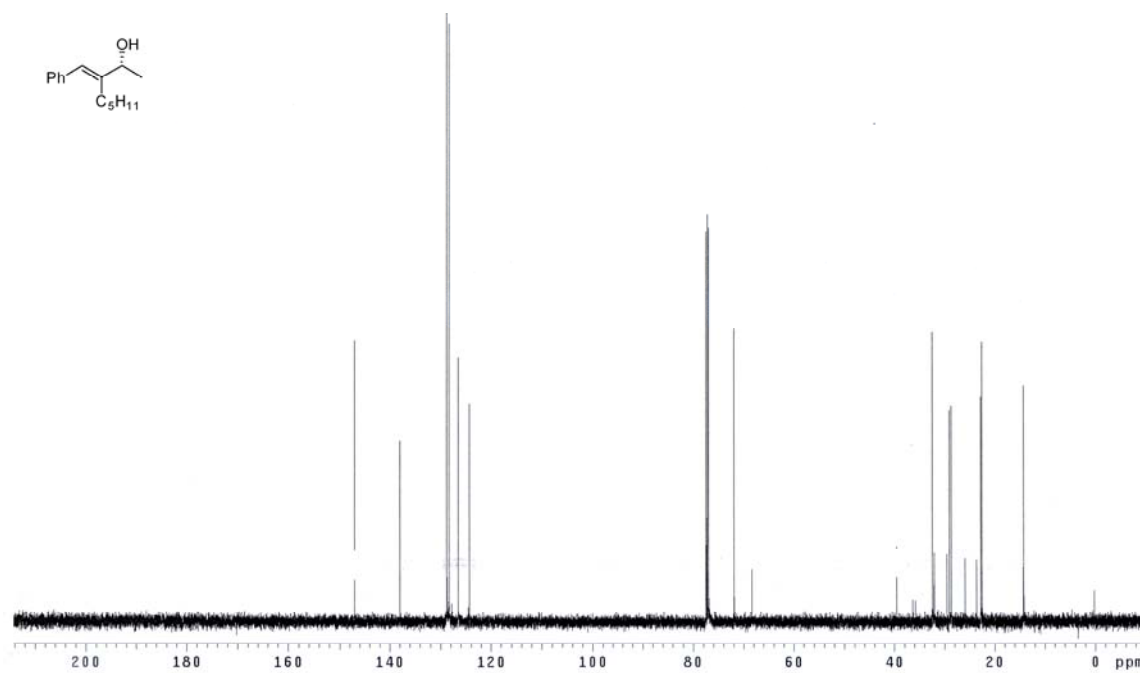

column: CHIRALCEL OD-H (serial ODH0CE-L1108), 0.46 x 25 cm  
 conditions: 2% IPA/hexanes, 1.0 mL/min

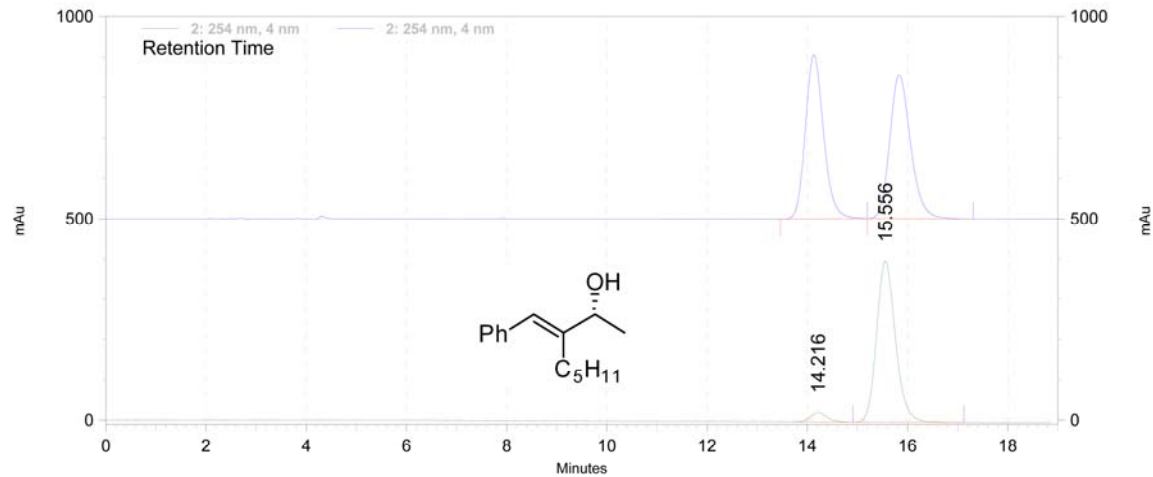

racemic mixture

**2: 254 nm, 4 nm Results**

| Retention Time | Area     | Area % |
|----------------|----------|--------|
| 15.132         | 11392421 | 50.02  |
| 16.836         | 11383052 | 49.98  |
| Totals         | 22775473 | 100.00 |

chiral experiment

**2: 254 nm, 4 nm Results**

| Retention Time | Area    | Area % |
|----------------|---------|--------|
| 14.216         | 444574  | 4.86   |
| 15.556         | 8700883 | 95.14  |
| Totals         | 9145457 | 100.00 |

RM768 CA

90% ee

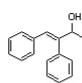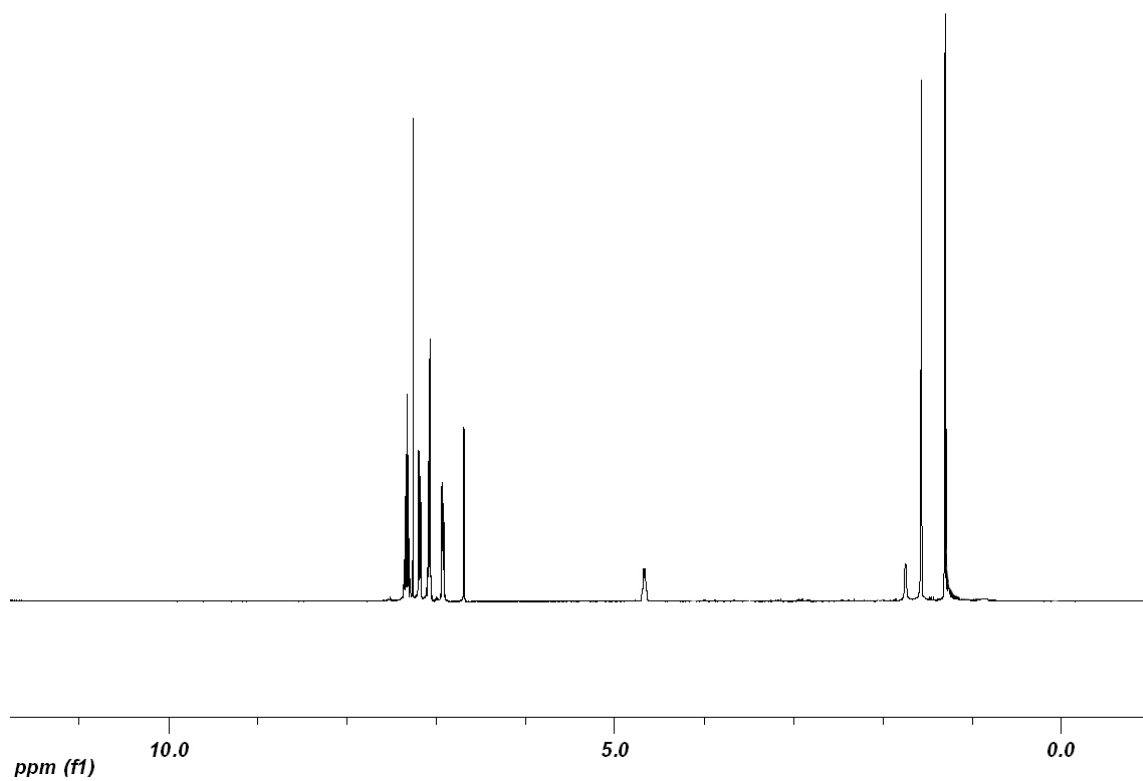

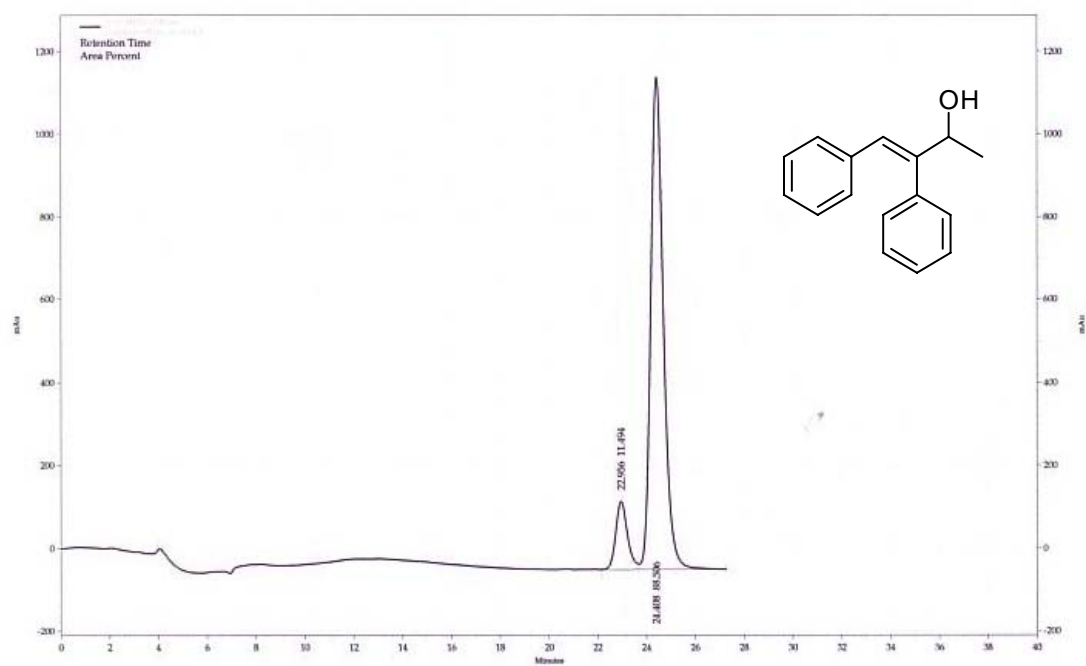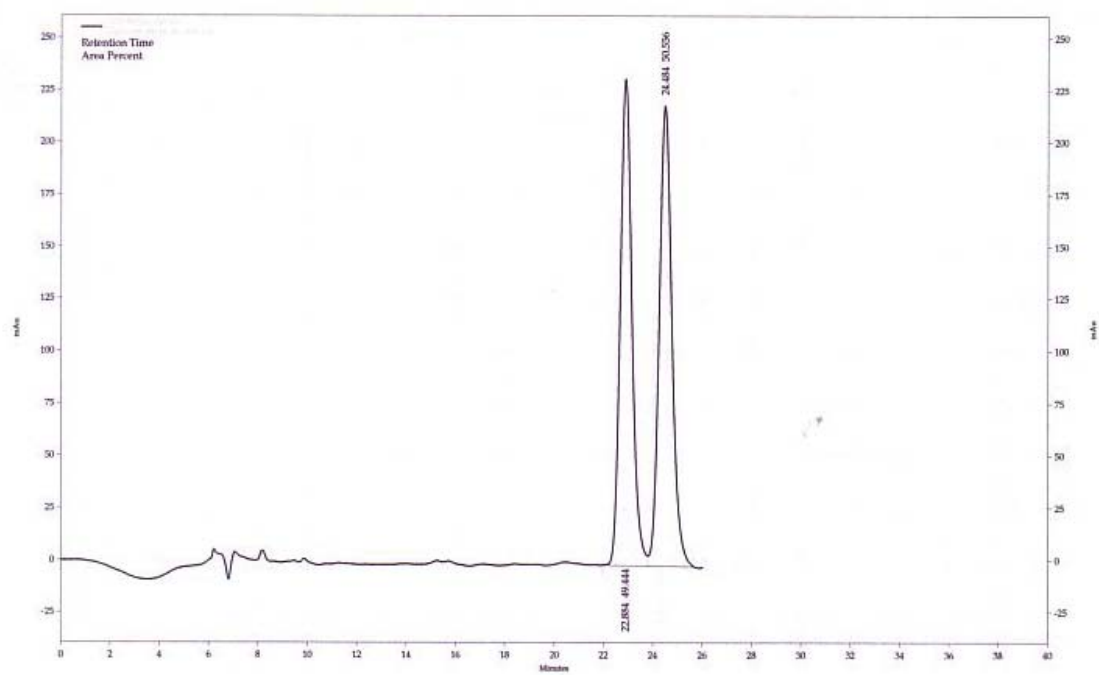

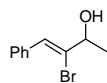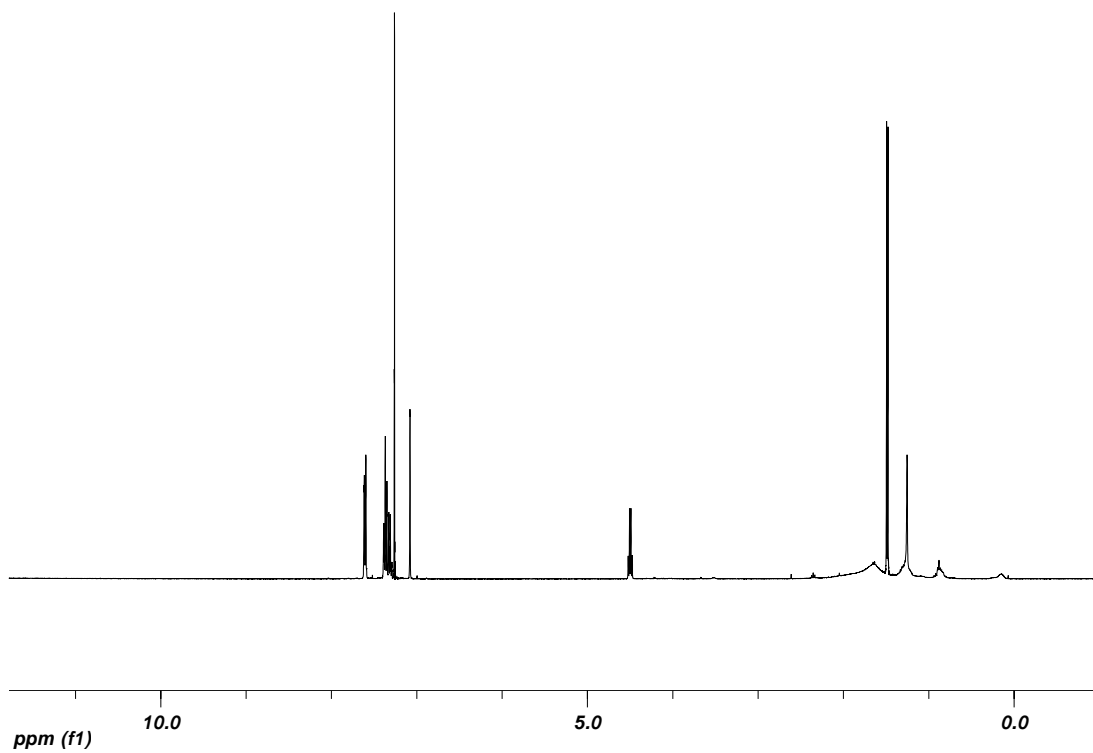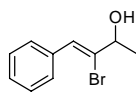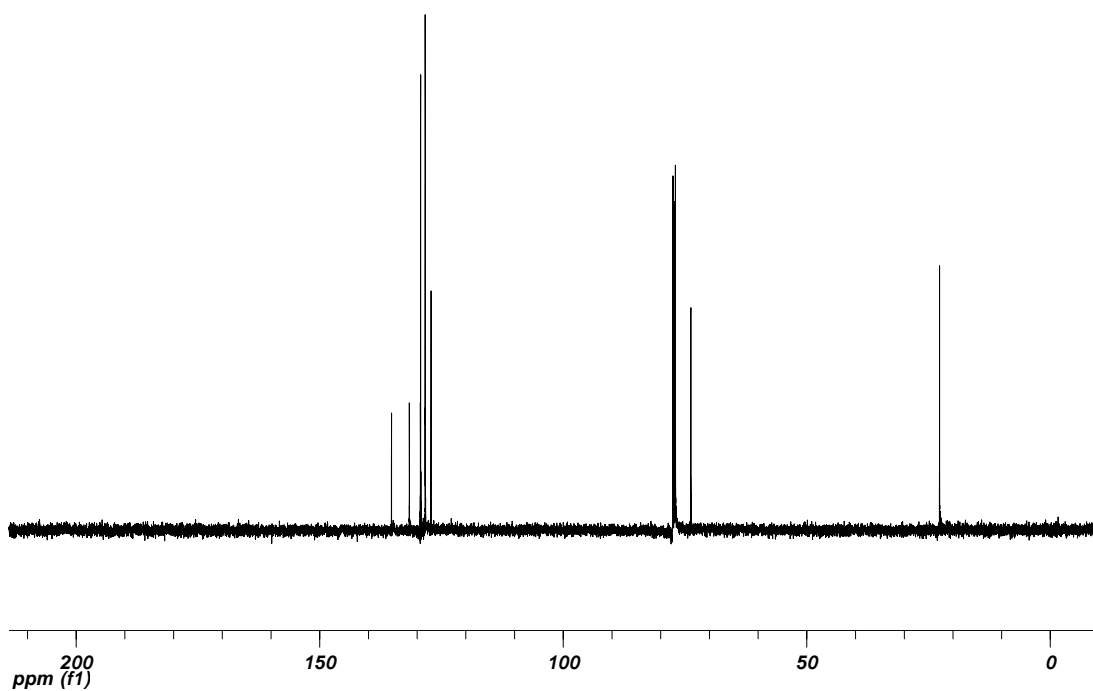

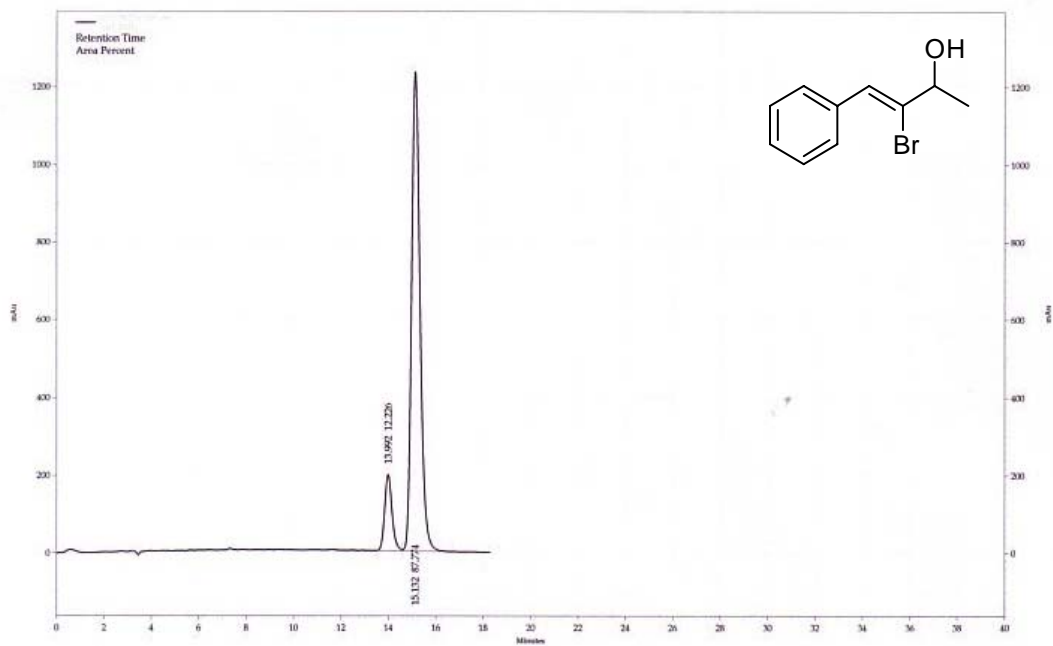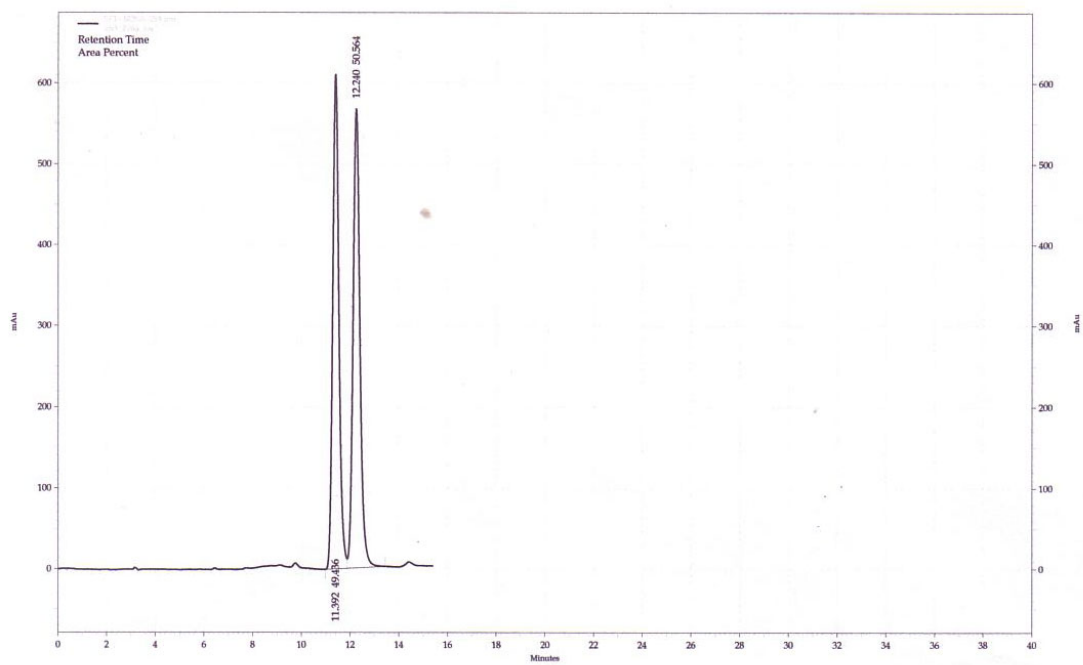

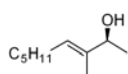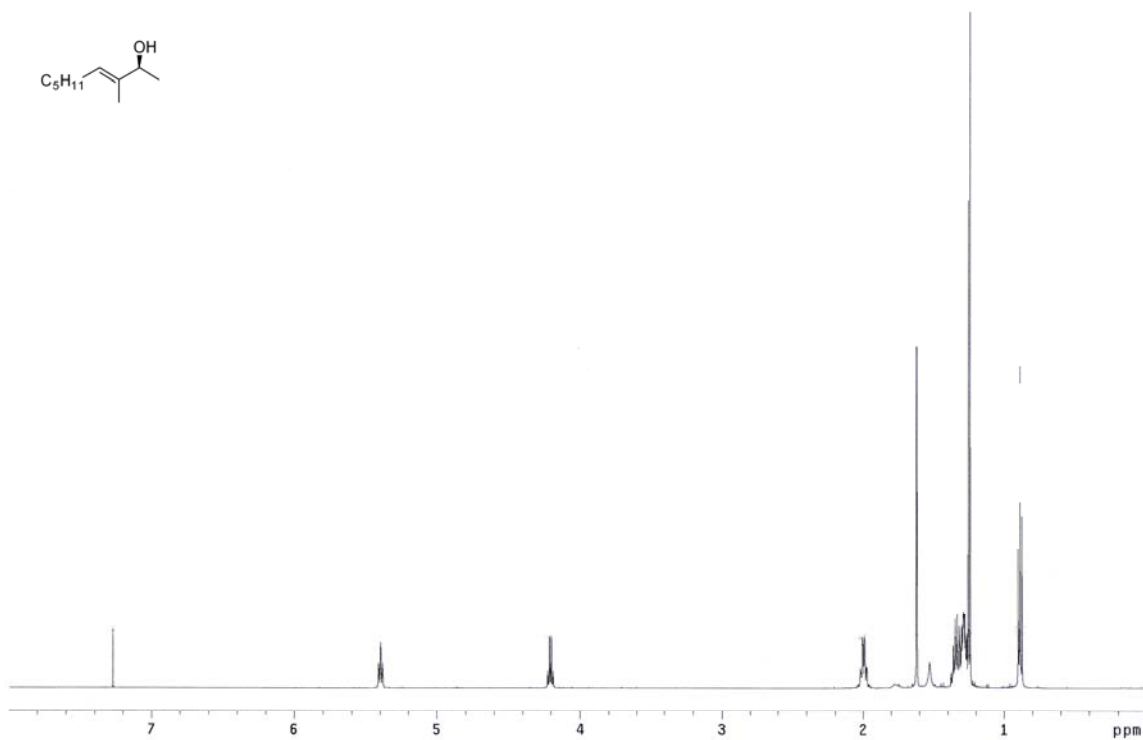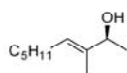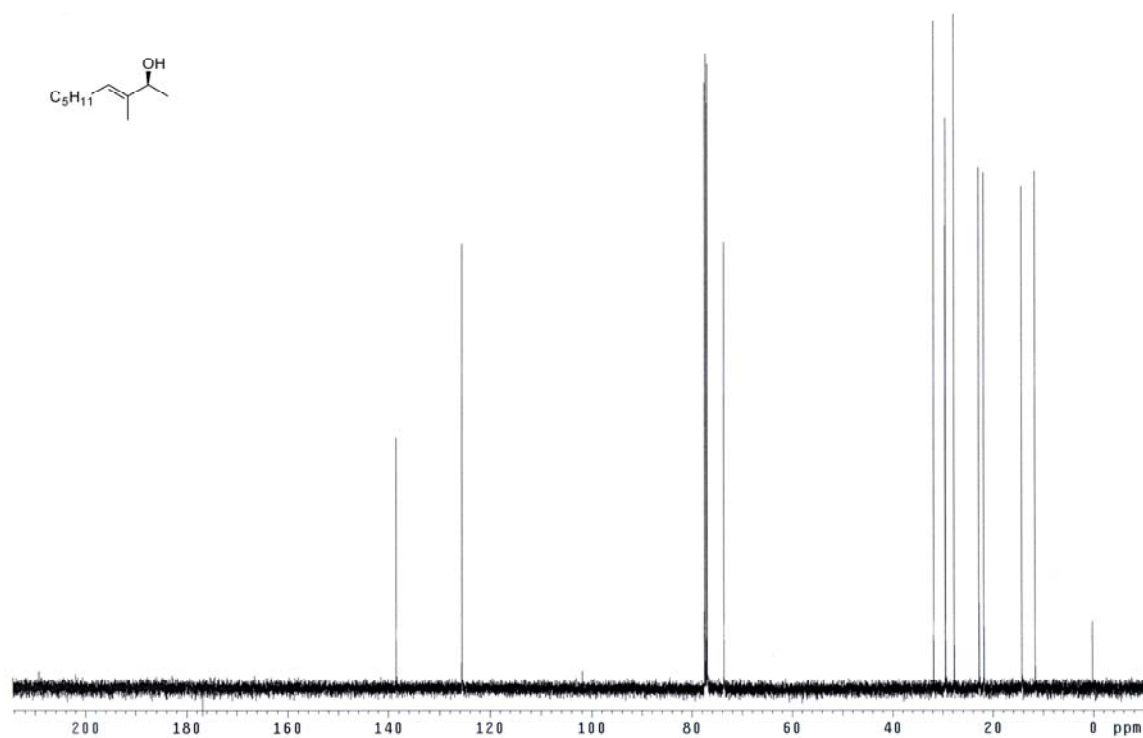

column: CHIRALPAK AD-H (serial ADH0CE-LJ049), 0.46 x 25 cm  
 conditions: 1% IPA/hexanes, 1.3 mL/min

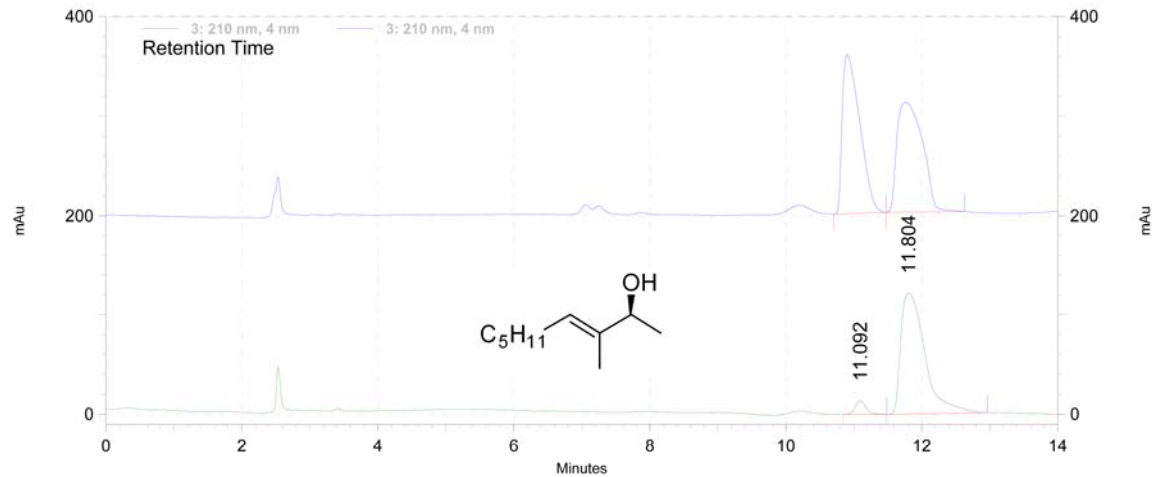

racemic mixture

**3: 210 nm, 4 nm Results**

| Retention Time | Area    | Area % |
|----------------|---------|--------|
| 10.900         | 2315780 | 49.90  |
| 11.760         | 2324782 | 50.10  |
| Totals         | 4640562 | 100.00 |

chiral experiment

**3: 210 nm, 4 nm Results**

| Retention Time | Area    | Area % |
|----------------|---------|--------|
| 11.092         | 49761   | 4.78   |
| 11.804         | 990419  | 95.22  |
| Totals         | 1040180 | 100.00 |

RM662 CA

90% ee

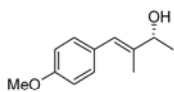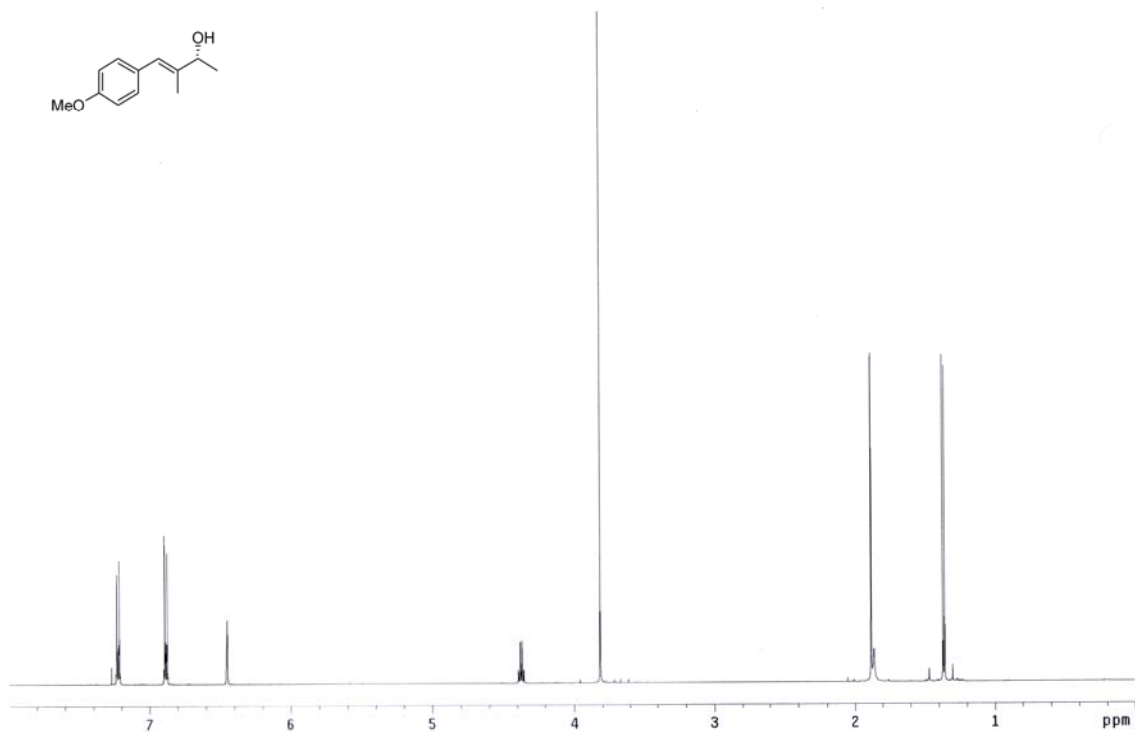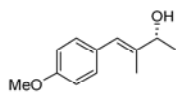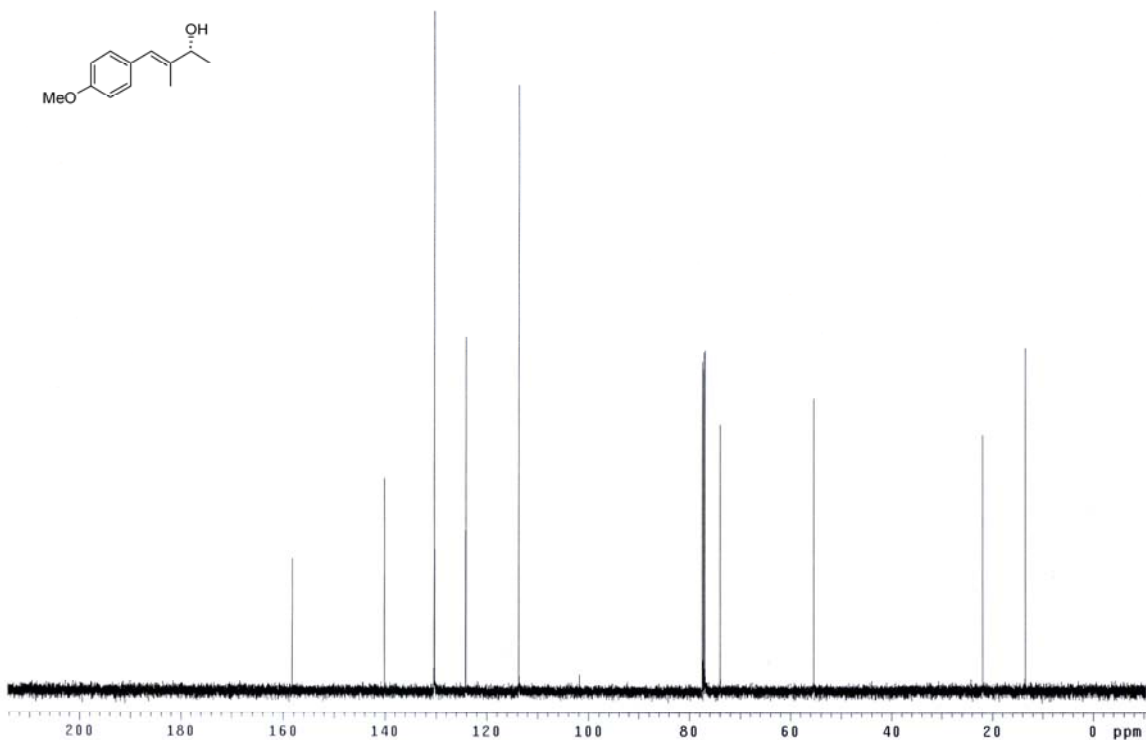

column: CHIRALCEL OB-H (serial OBH0CE-CE001), 0.46 x 25 cm  
 conditions: 10% IPA/hexanes, 1.0 mL/min

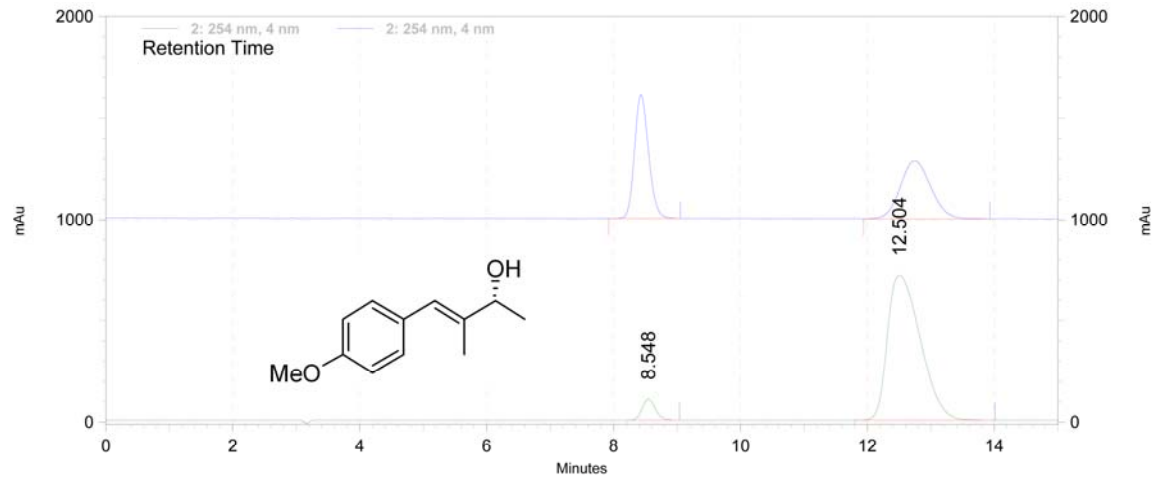

racemic mixture

**2: 254 nm, 4 nm Results**

| Retention Time | Area     | Area % |
|----------------|----------|--------|
| 8.532          | 9320462  | 49.67  |
| 12.844         | 9444695  | 50.33  |
| Totals         | 18765157 | 100.00 |

chiral experiment

**2: 254 nm, 4 nm Results**

| Retention Time | Area     | Area % |
|----------------|----------|--------|
| 8.548          | 3725778  | 5.51   |
| 12.504         | 63879102 | 94.49  |
| Totals         | 67604880 | 100.00 |

RM733 CA

89 % ee

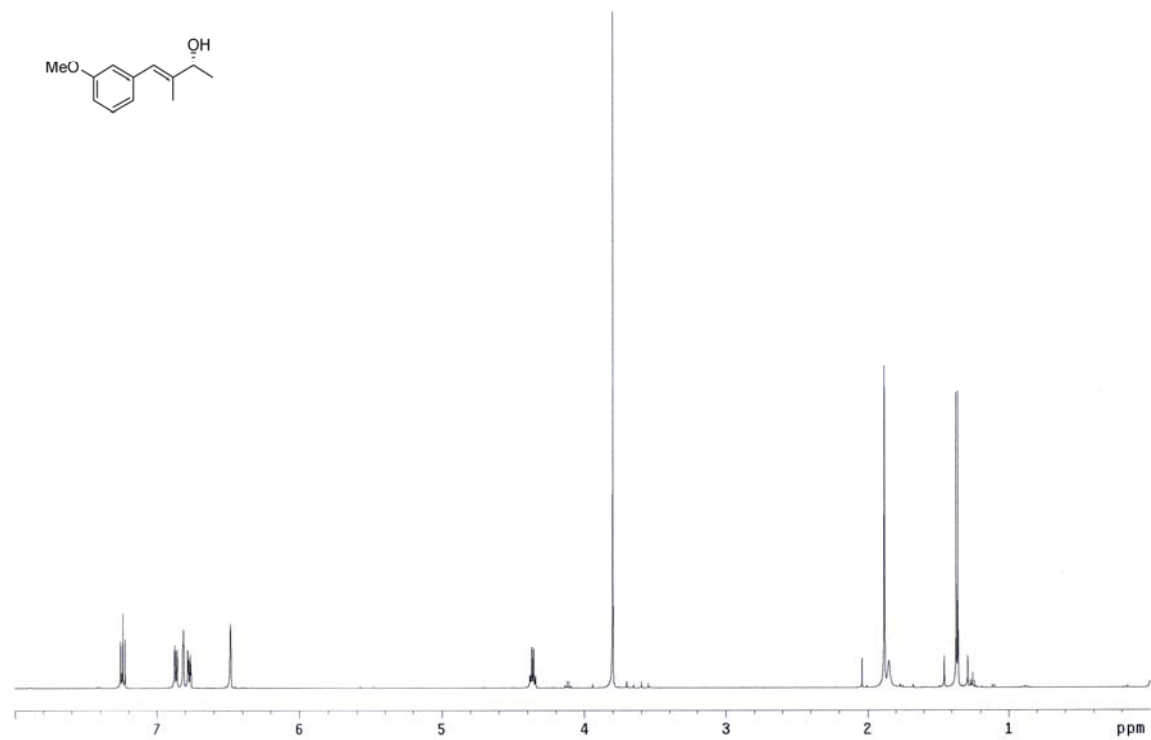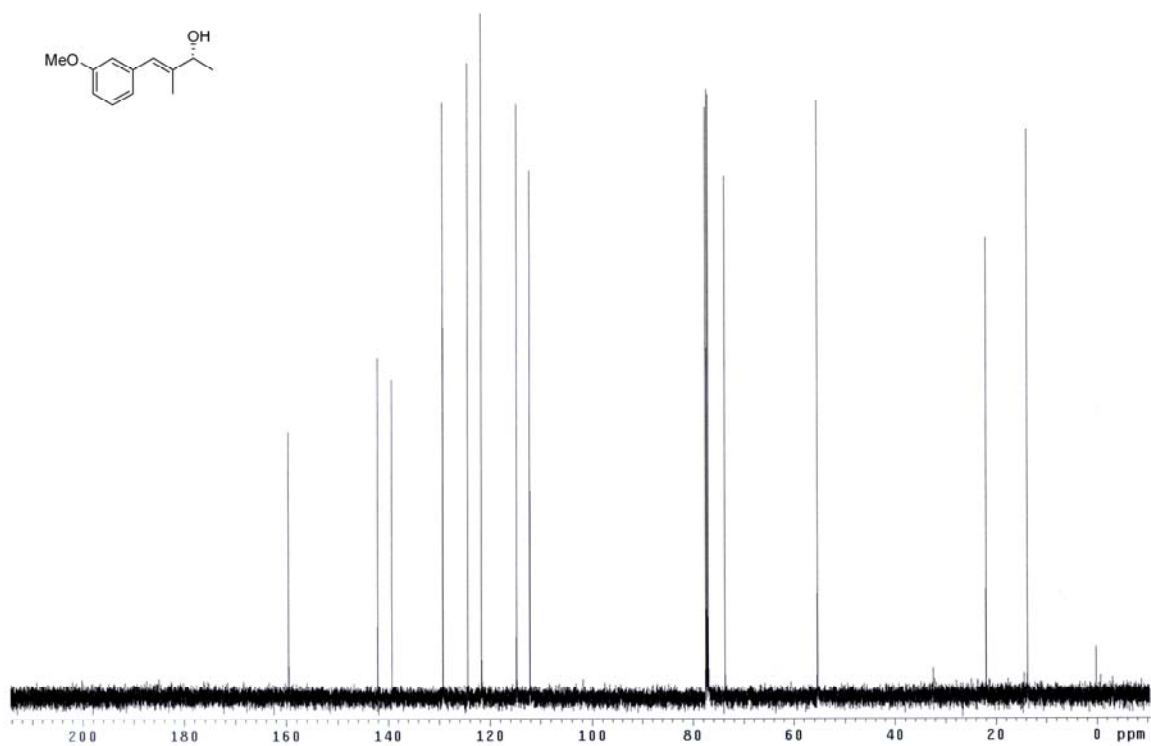

column: CHIRALCEL OD-H (serial ODH0CE-L1108), 0.46 x 25 cm  
 conditions: 5% IPA/hexanes, 1.0 mL/min

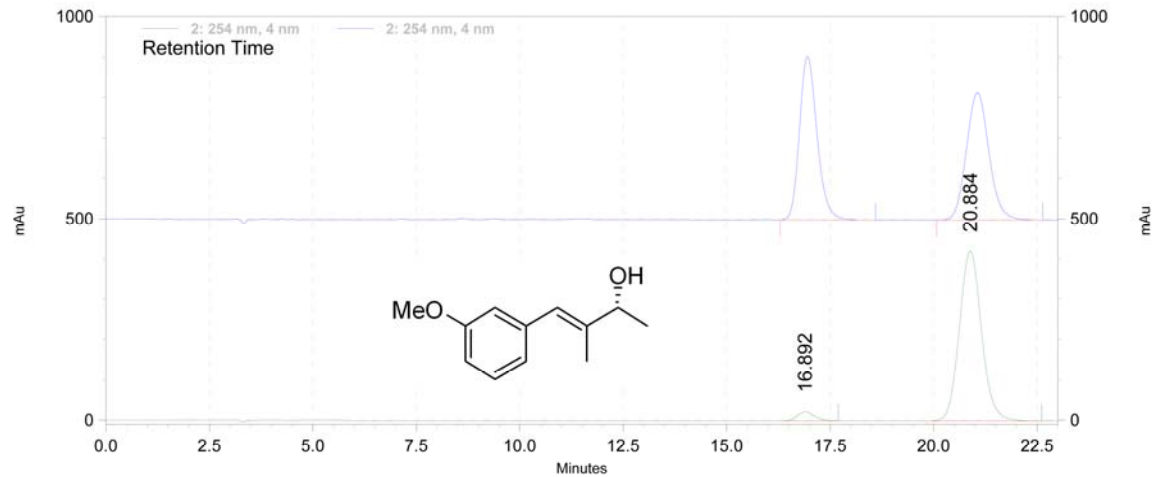

racemic mixture

**2: 254 nm, 4 nm Results**

| Retention Time | Area     | Area % |
|----------------|----------|--------|
| 16.948         | 14886737 | 49.96  |
| 21.056         | 14913513 | 50.04  |
| Totals         | 29800250 | 100.00 |

chiral experiment

**2: 254 nm, 4 nm Results**

| Retention Time | Area     | Area % |
|----------------|----------|--------|
| 16.892         | 851668   | 3.92   |
| 20.884         | 20870043 | 96.08  |
| Totals         | 21721711 | 100.00 |

RM771 CA

92% ee

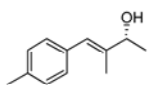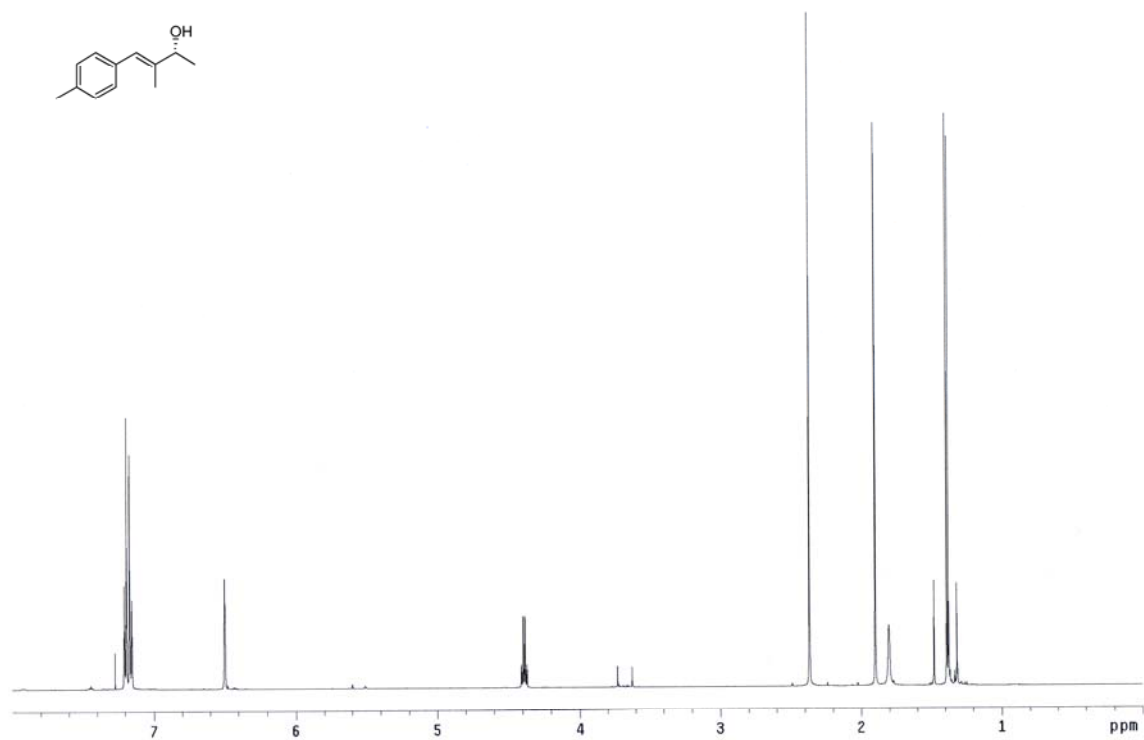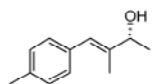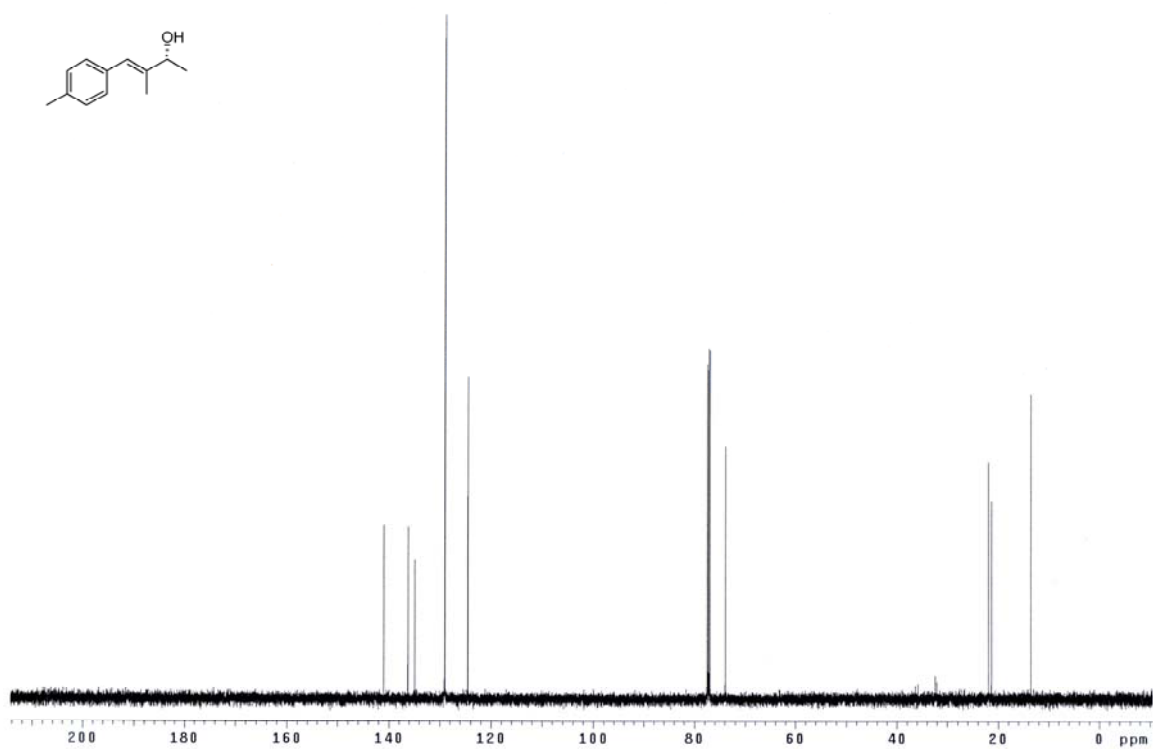

column: CHIRALPAK AD-H (serial ADH0CE-LJ049), 0.46 x 25 cm  
 conditions: 2% IPA/hexanes, 1.0 mL/min

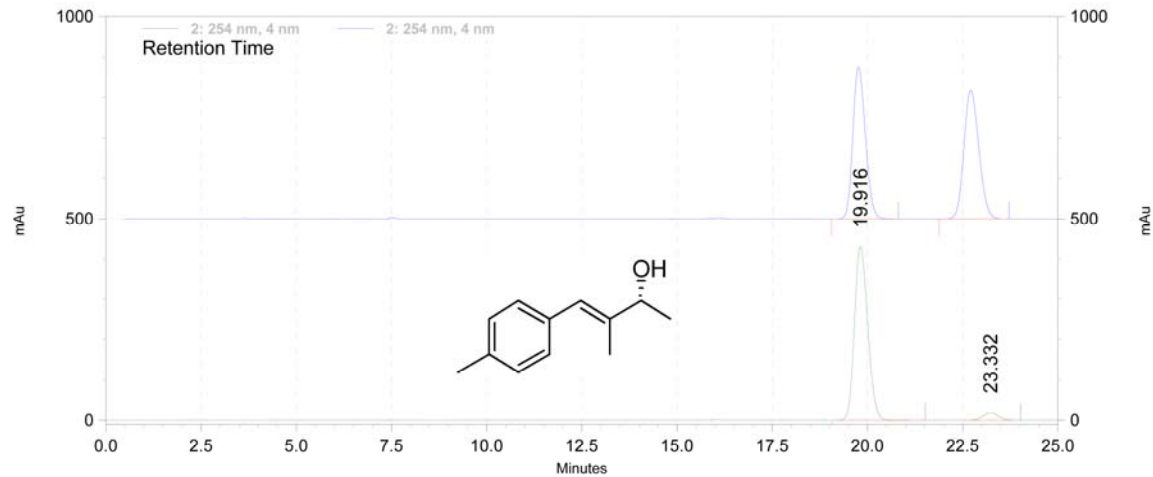

racemic mixture

**2: 254 nm, 4 nm Results**

| Retention Time | Area     | Area % |
|----------------|----------|--------|
| 19.264         | 24628867 | 49.87  |
| 22.212         | 24755737 | 50.13  |
| Totals         | 49384604 | 100.00 |

chiral experiment

**2: 254 nm, 4 nm Results**

| Retention Time | Area     | Area % |
|----------------|----------|--------|
| 19.916         | 26045810 | 95.10  |
| 23.332         | 1342390  | 4.90   |
| Totals         | 27388200 | 100.00 |

RM772 CA

90% ee

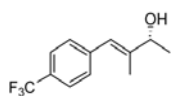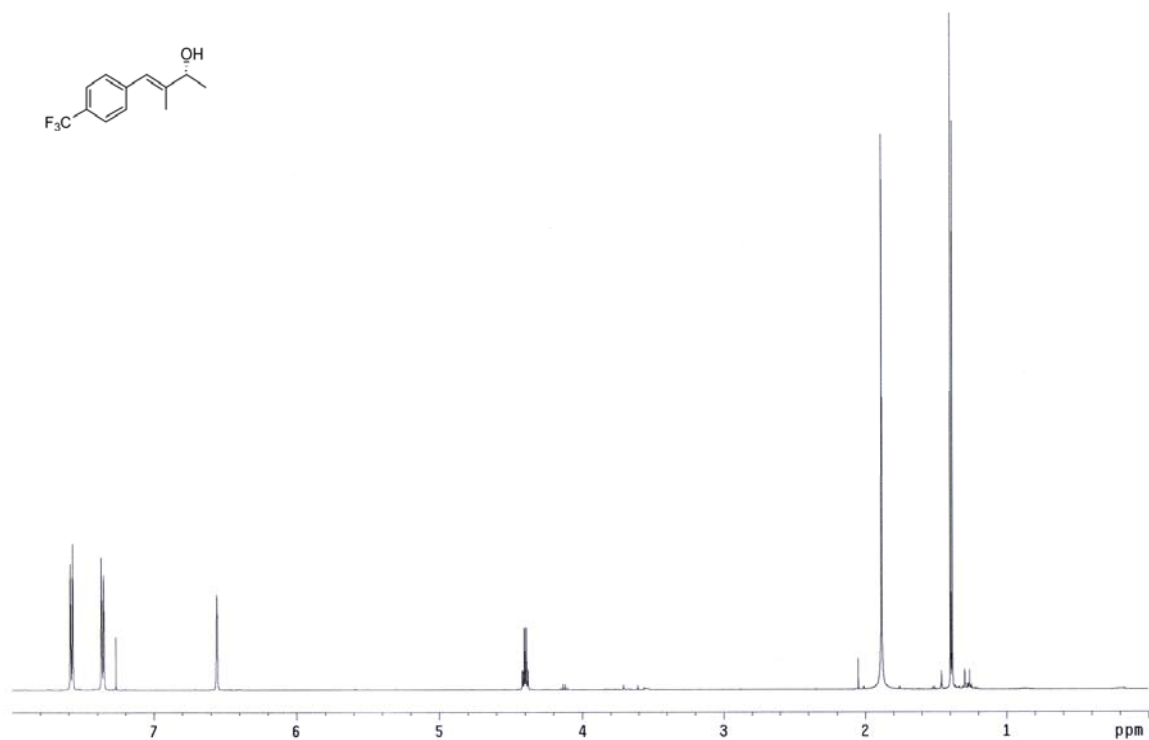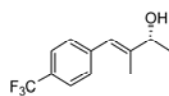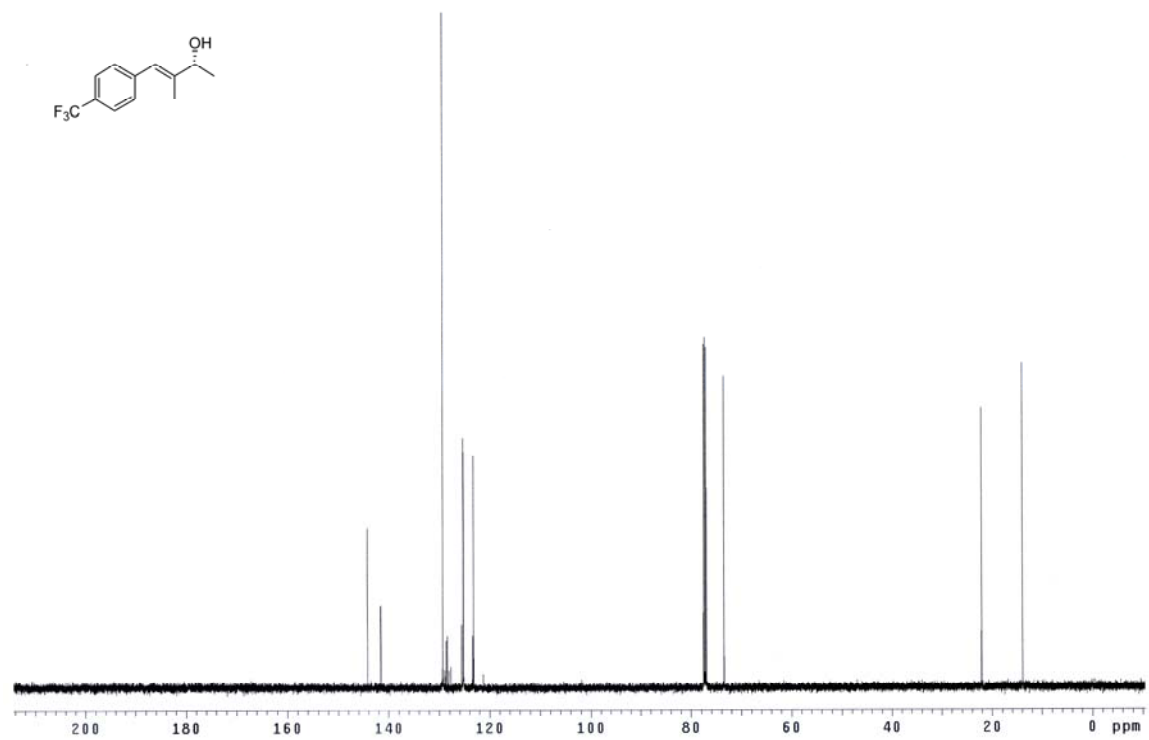

column: CHIRALCEL OD-H (serial ODH0CE-L1108), 0.46 x 25 cm  
 conditions: 2% IPA/hexanes, 1.0 mL/min

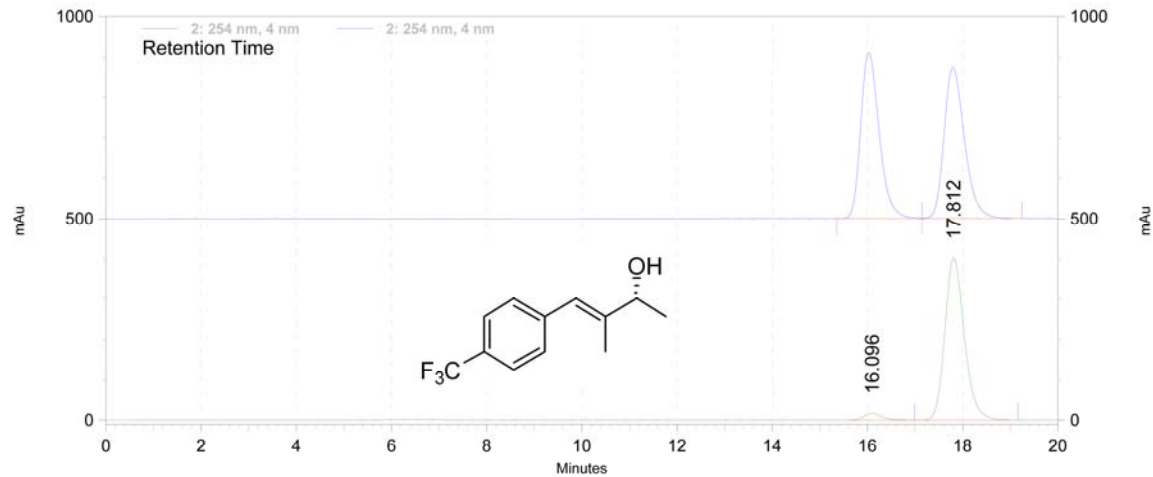

racemic mixture

**2: 254 nm, 4 nm Results**

| Retention Time | Area     | Area % |
|----------------|----------|--------|
| 17.224         | 44179122 | 49.83  |
| 18.996         | 44472226 | 50.17  |
| Totals         | 88651348 | 100.00 |

chiral experiment

**2: 254 nm, 4 nm Results**

| Retention Time | Area     | Area % |
|----------------|----------|--------|
| 16.096         | 583646   | 3.70   |
| 17.812         | 15169941 | 96.30  |
| Totals         | 15753587 | 100.00 |

RM773 CA

93% ee

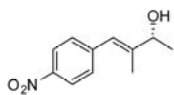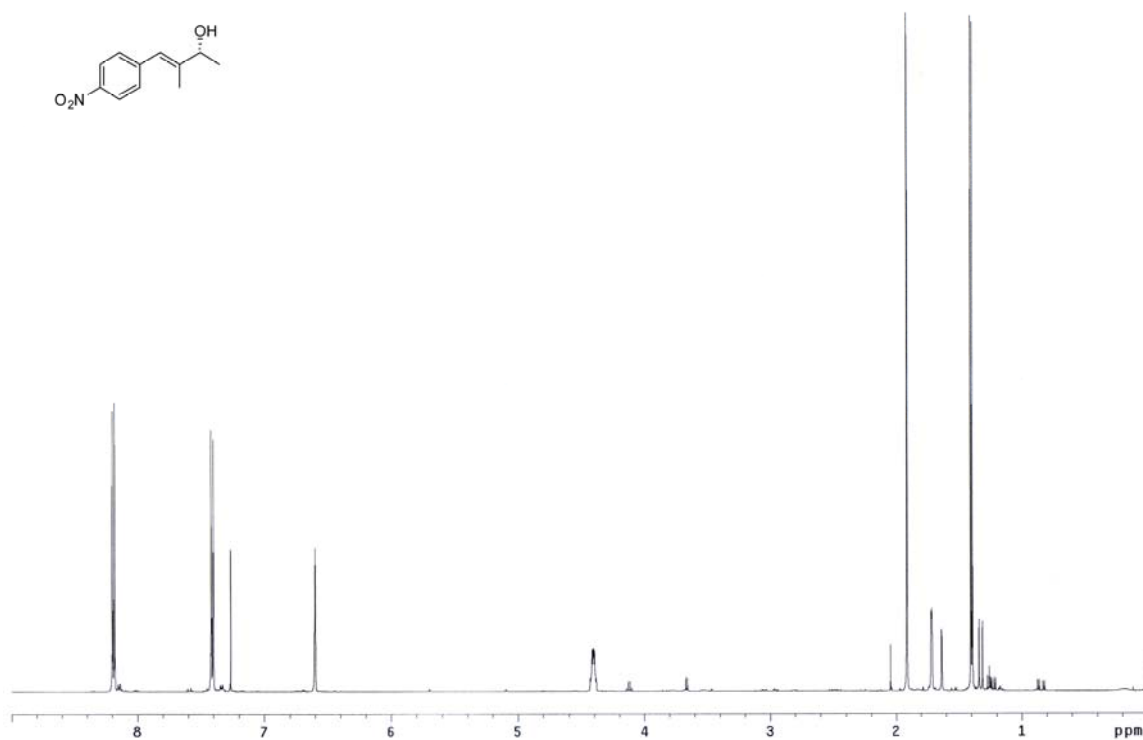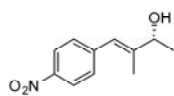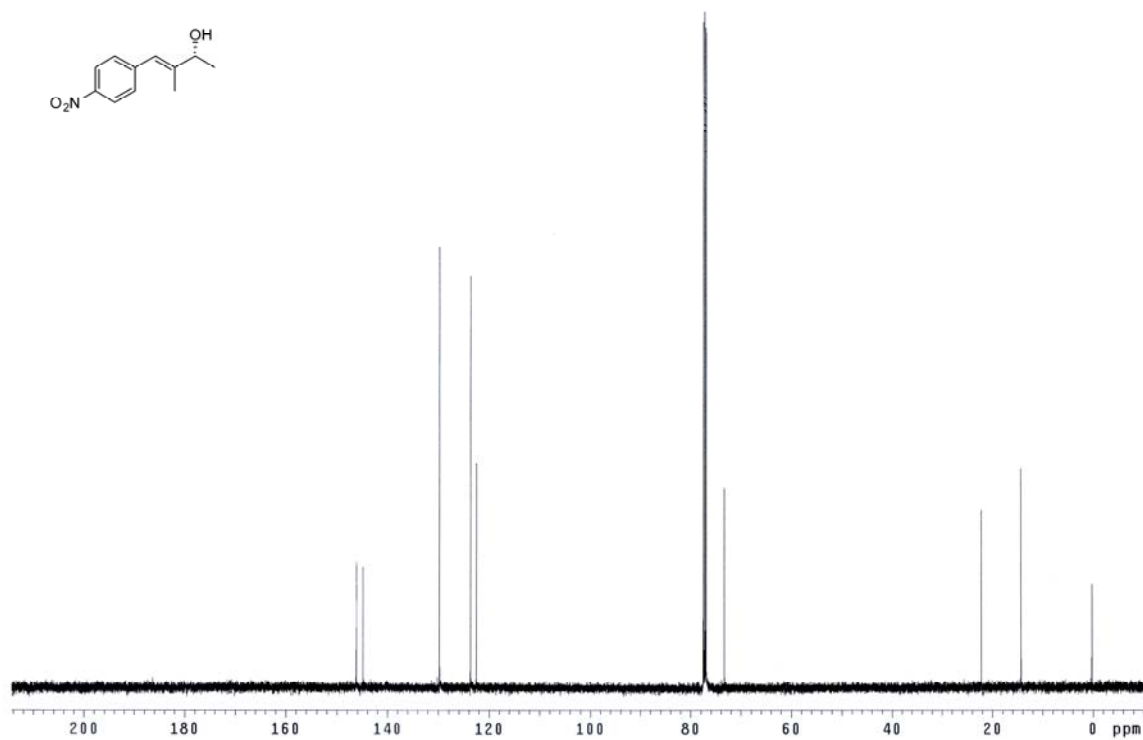

column: OD-H (serial ODH0CE-L1108), 0.46 x 25 cm  
 conditions: 5% IPA/hexanes, 1.0 mL/min

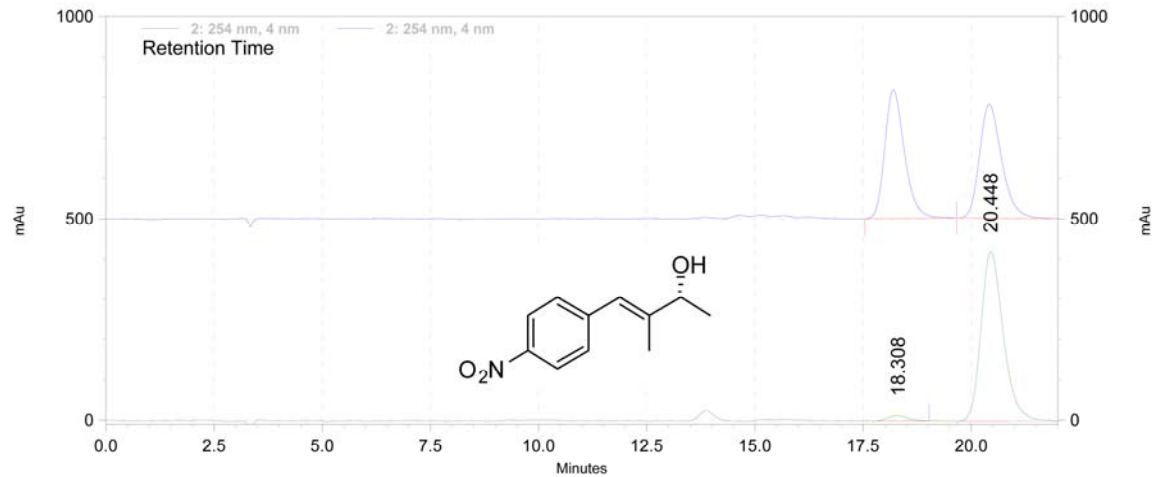

racemic sample

**2: 254 nm, 4 nm Results**

| Retention Time | Area     | Area % |
|----------------|----------|--------|
| 18.200         | 7177014  | 50.15  |
| 20.412         | 7133983  | 49.85  |
| Totals         | 14310997 | 100.00 |

chiral experiment

**2: 254 nm, 4 nm Results**

| Retention Time | Area    | Area % |
|----------------|---------|--------|
| 18.308         | 183835  | 2.62   |
| 20.448         | 6825970 | 97.38  |
| Totals         | 7009805 | 100.00 |

**RM761 CA**

**95% ee**

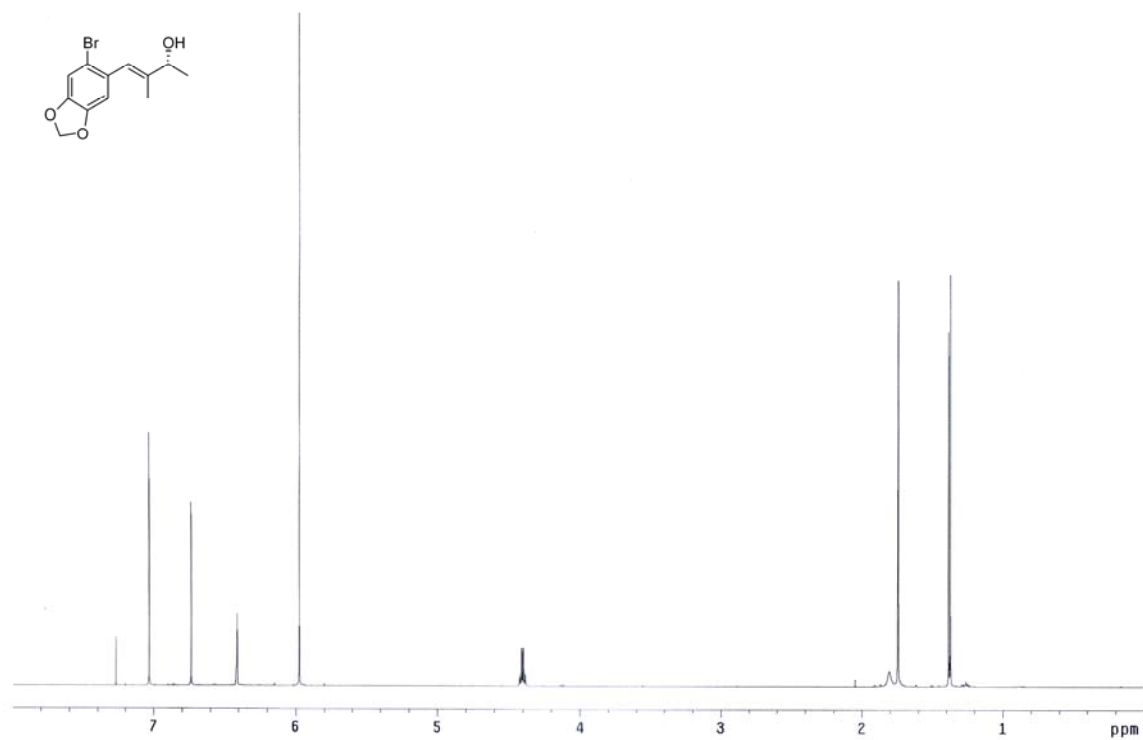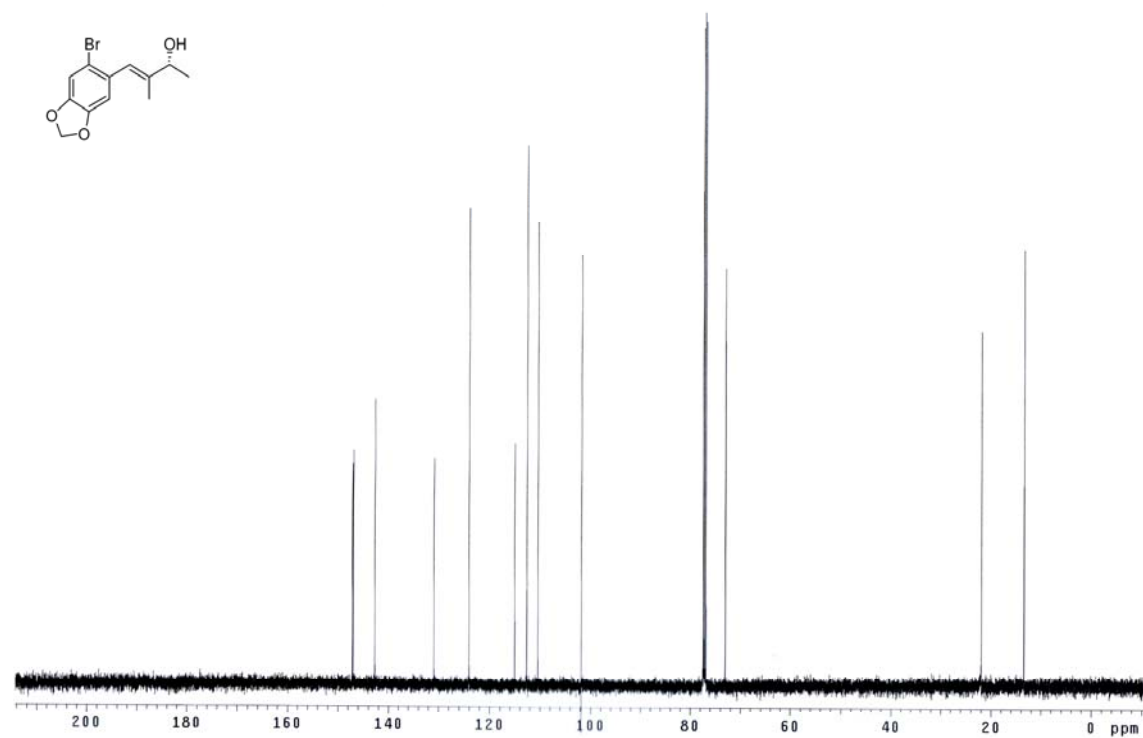

column: CHIRALCEL OD-H (serial ODH0CE-L1108), 0.46 x 25 cm  
 conditions: 5% IPA/hexanes, 1.0 mL/min

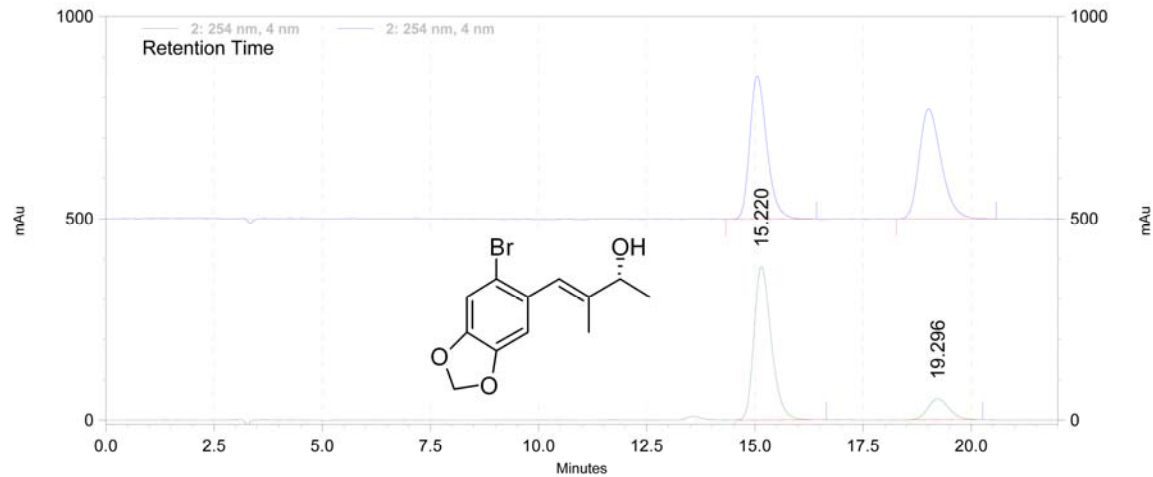

racemic mixture

**2: 254 nm, 4 nm Results**

| Retention Time | Area     | Area % |
|----------------|----------|--------|
| 15.052         | 9731569  | 50.32  |
| 19.016         | 9606169  | 49.68  |
| Totals         | 19337738 | 100.00 |

chiral experiment

**2: 254 nm, 4 nm Results**

| Retention Time | Area     | Area % |
|----------------|----------|--------|
| 15.220         | 10538988 | 85.64  |
| 19.296         | 1767373  | 14.36  |
| Totals         | 12306361 | 100.00 |

**RM763 CA**

**71% ee**

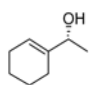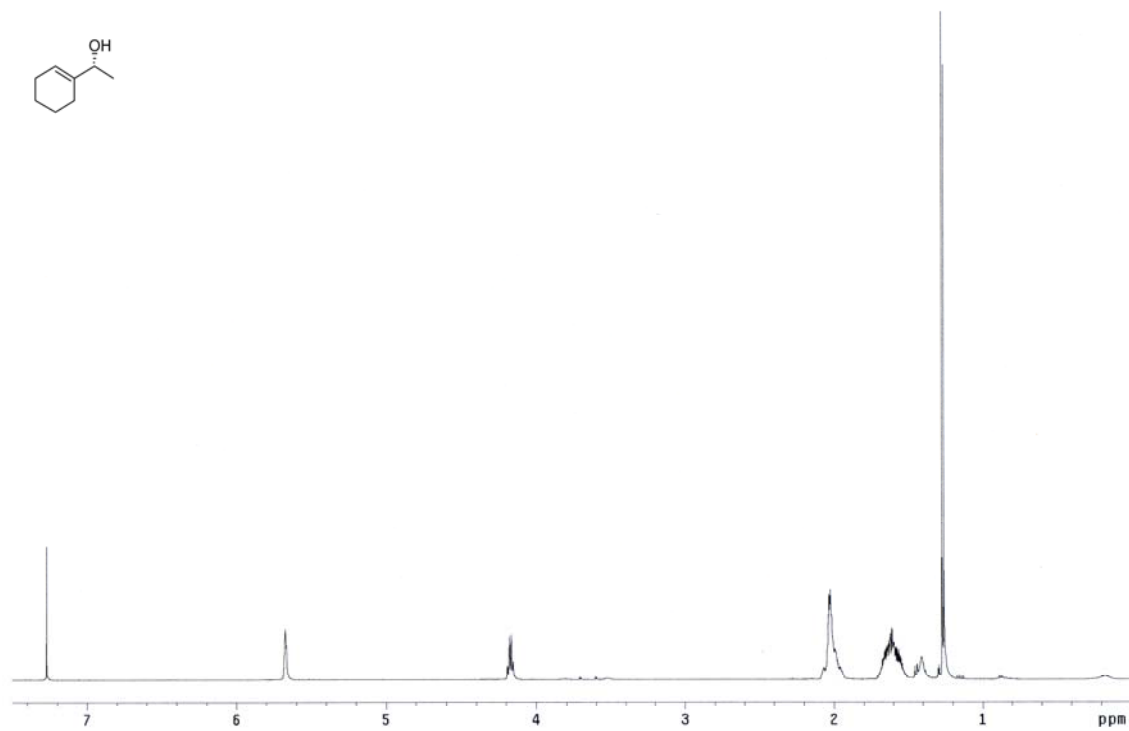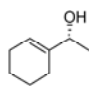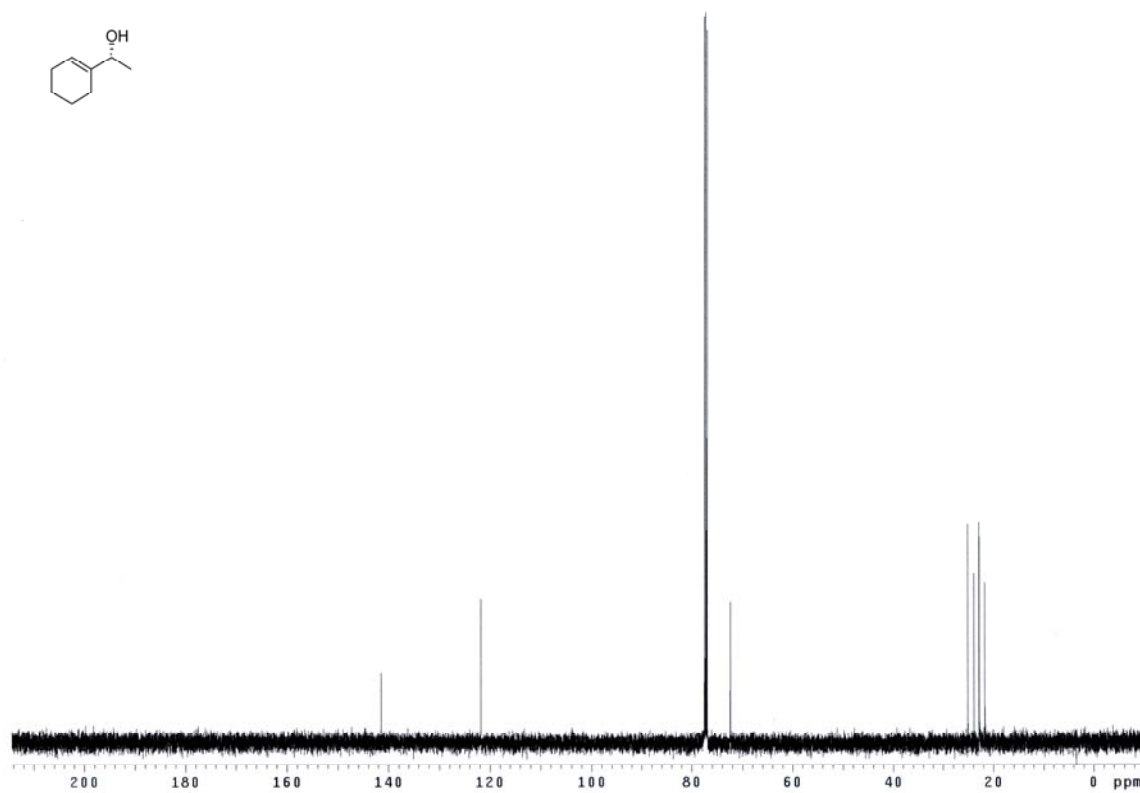

File :C:\msdchem\1\DATA\RM\RM695\_CA\_005.D  
Operator : RM  
Acquired : 28 Oct 2009 17:48 using AcqMethod chiral test.M  
Instrument : HP G1530A  
Sample Name: RM695\_CA\_005  
Misc Info :  
Vial Number: 1

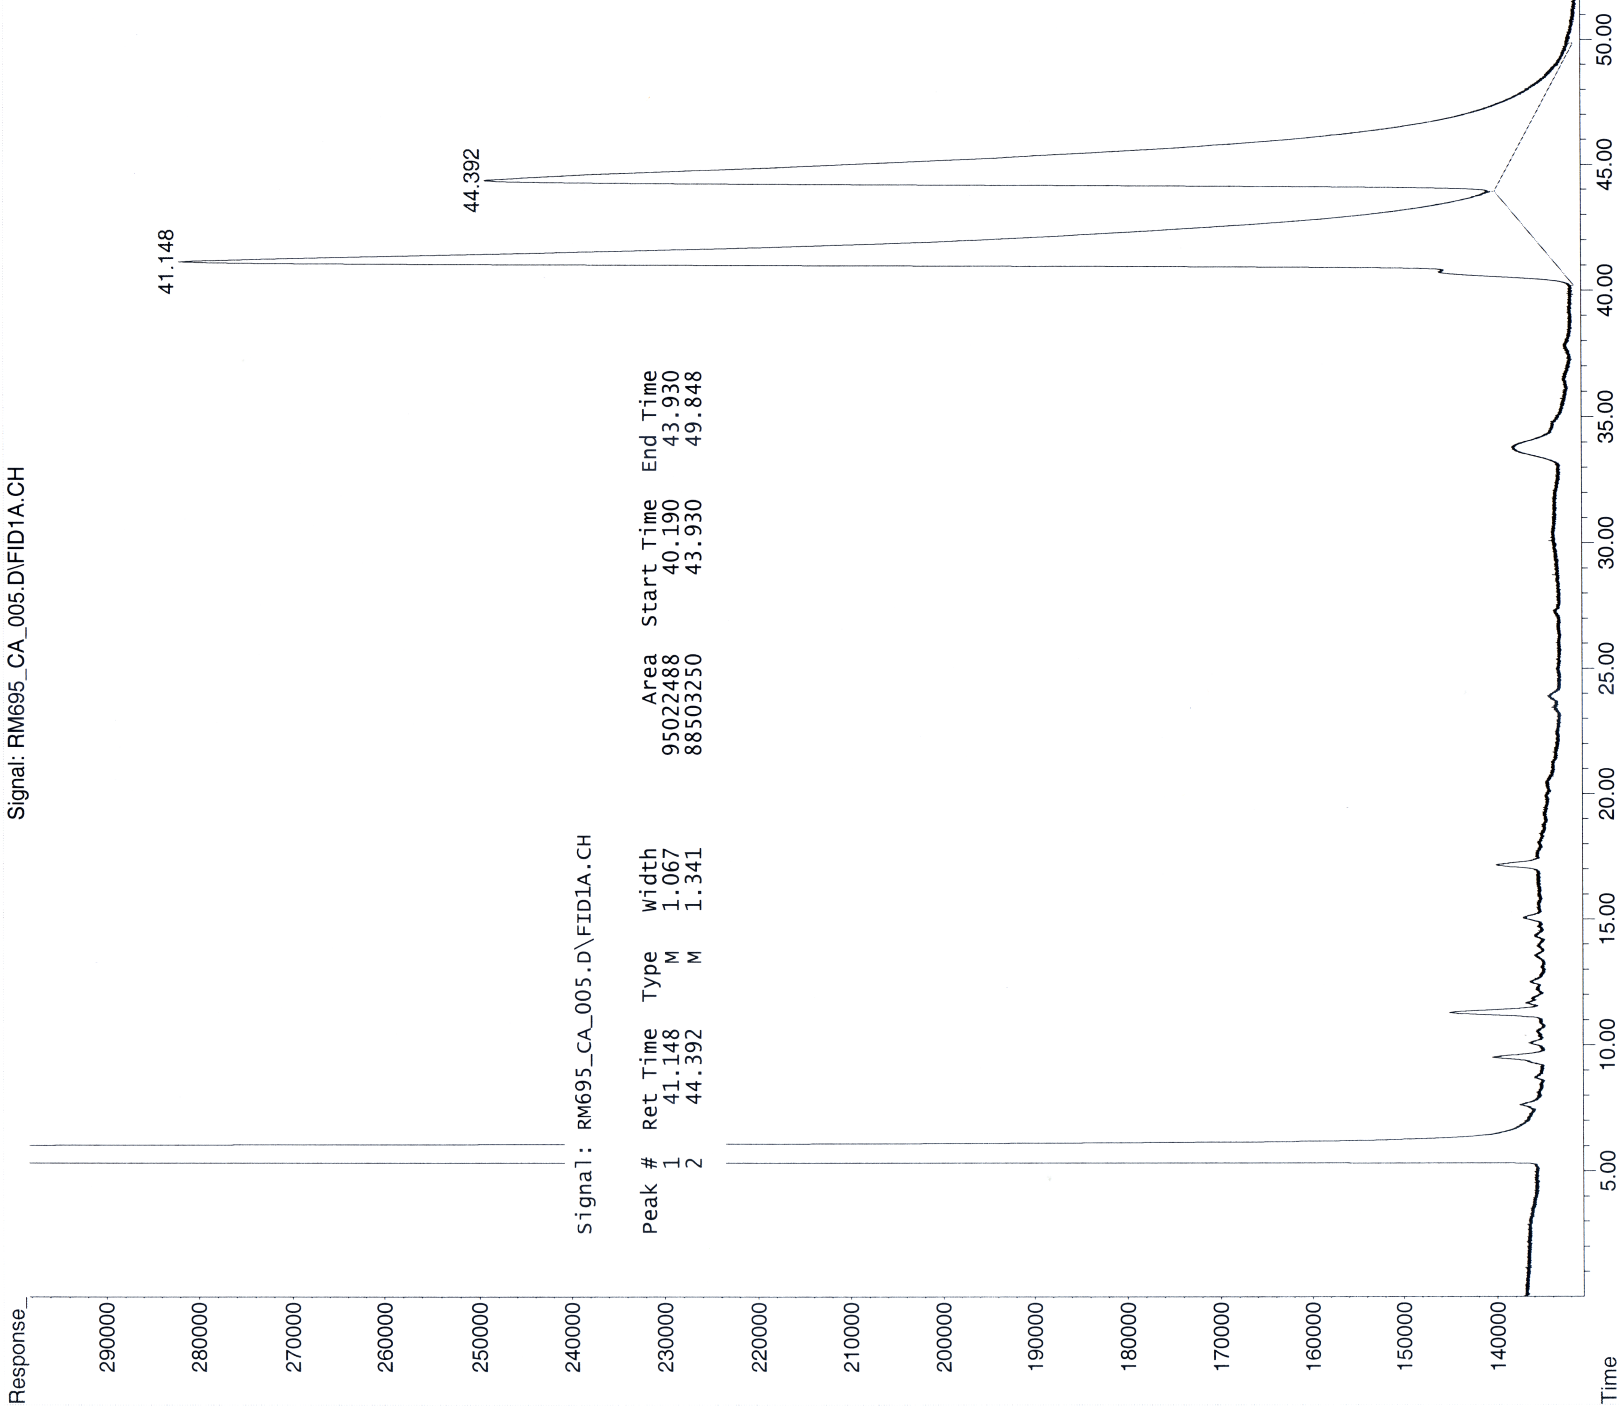

File :C:\msdchem\1\DATA\RM\RM753\_CA\_002.D  
Operator : RM  
Acquired : 28 Oct 2009 21:07 using AcqMethod chiral test.M  
Instrument : HP G1530A  
Sample Name: RM695\_CA\_002  
Misc Info :  
Vial Number: 1

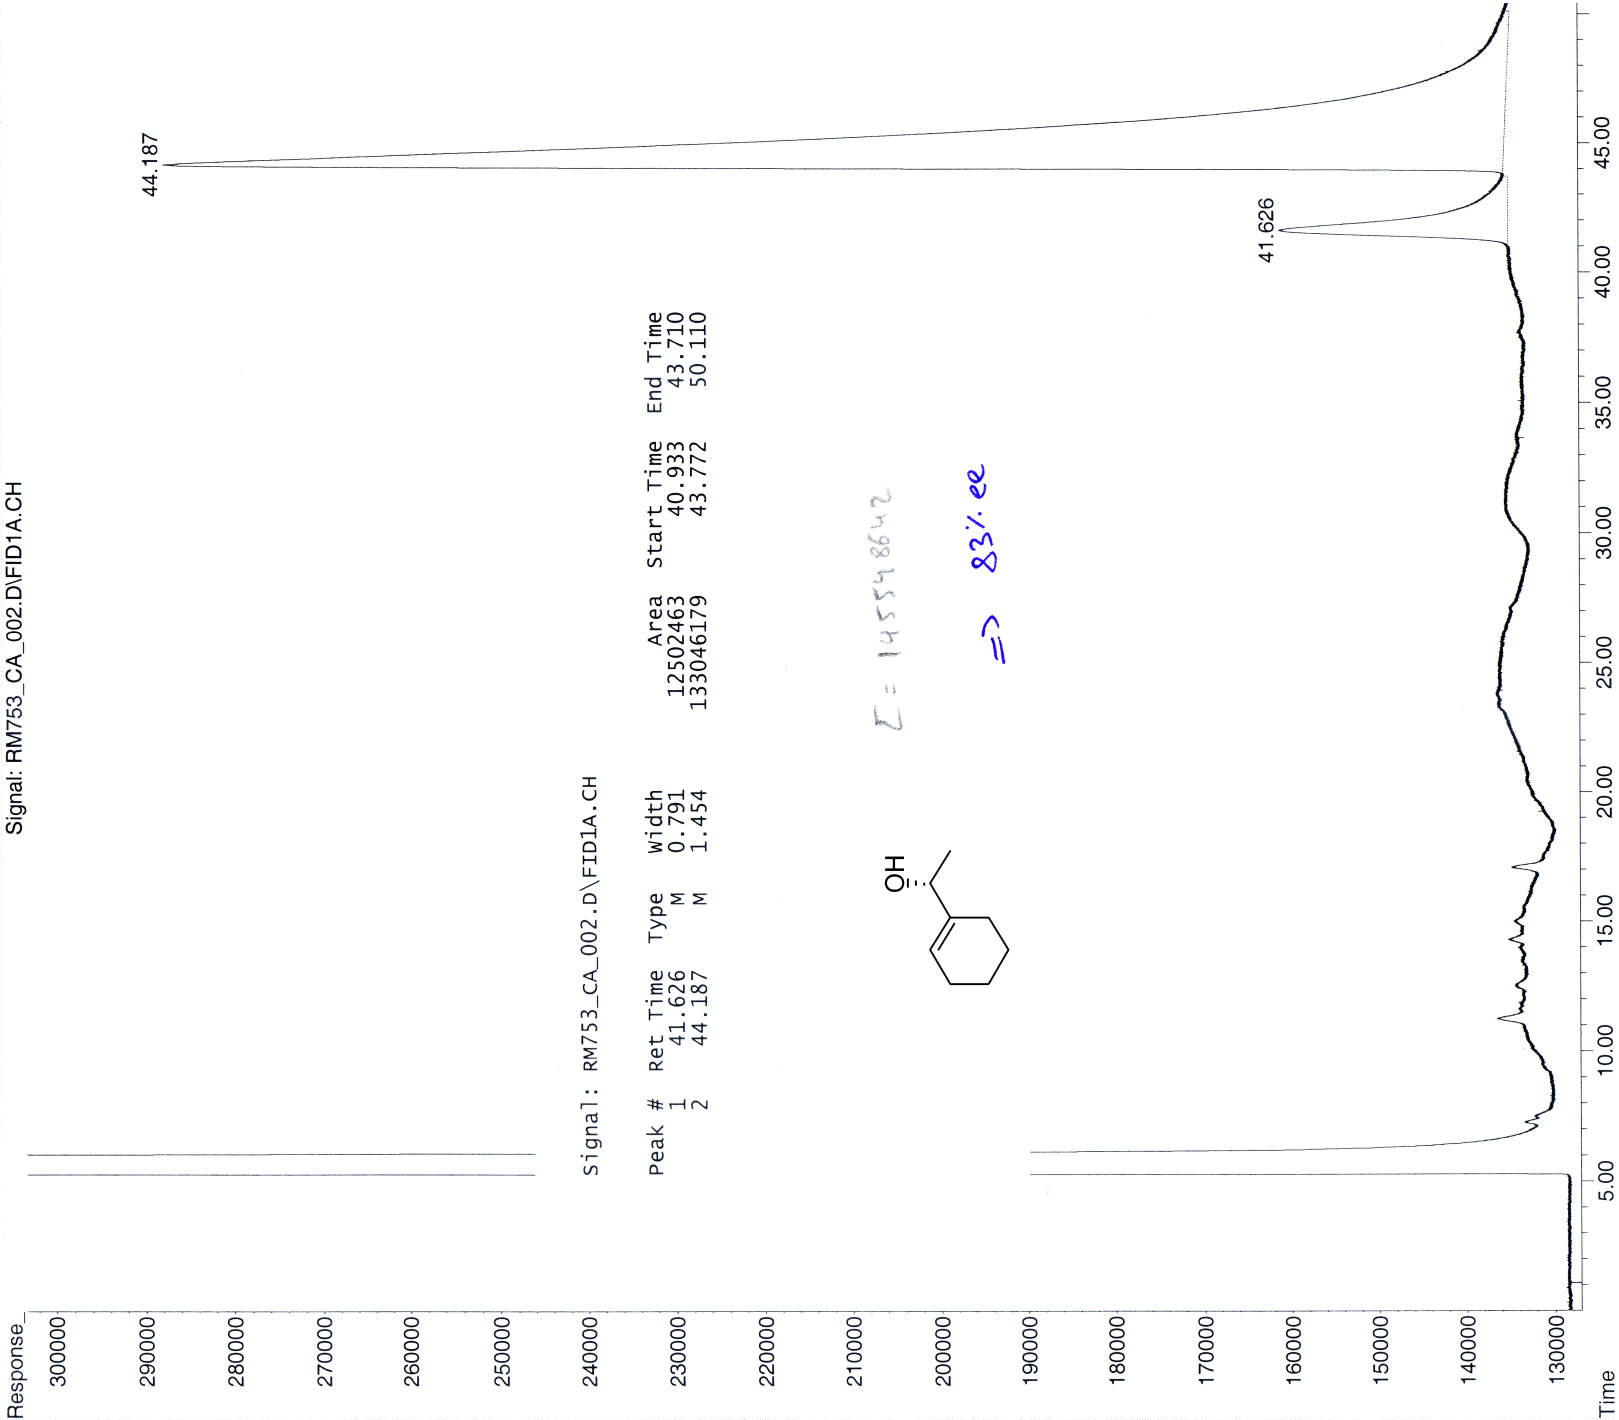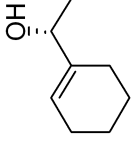

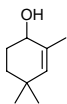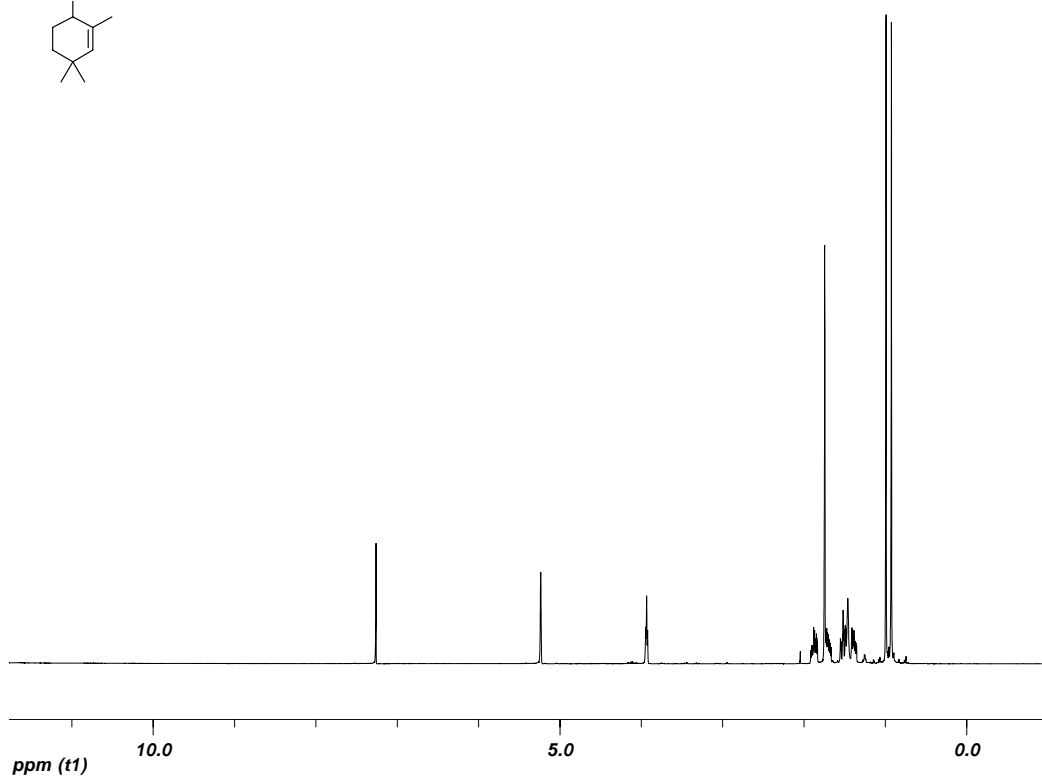

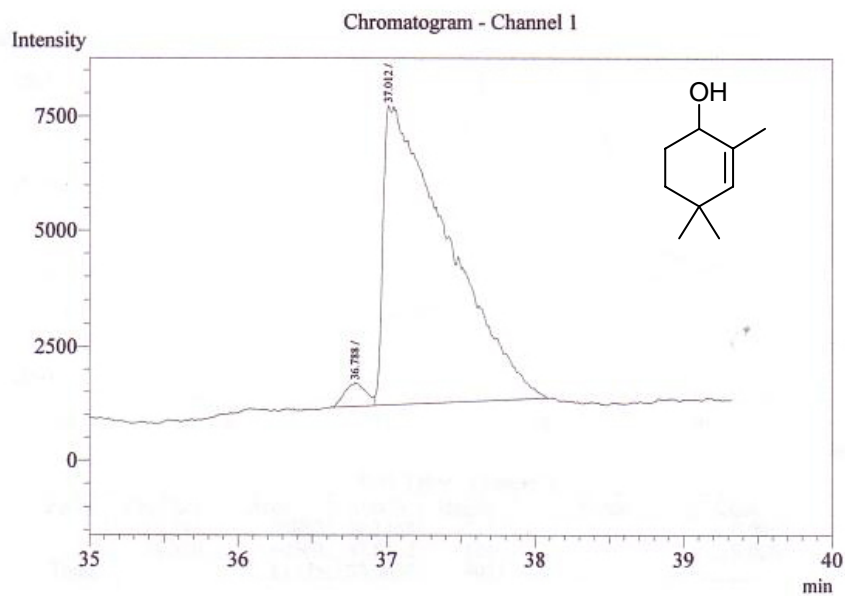

Peak Table - Channel 1

| Peak# | Ret.Time | Area   | Area%    | Height | Name | Conc. |
|-------|----------|--------|----------|--------|------|-------|
| 1     | 36.788   | 5262   | 2.5793   | 520    |      | 0.000 |
| 2     | 37.012   | 198730 | 97.4207  | 6505   |      | 0.000 |
| Total |          | 203992 | 100.0000 | 7025   |      |       |

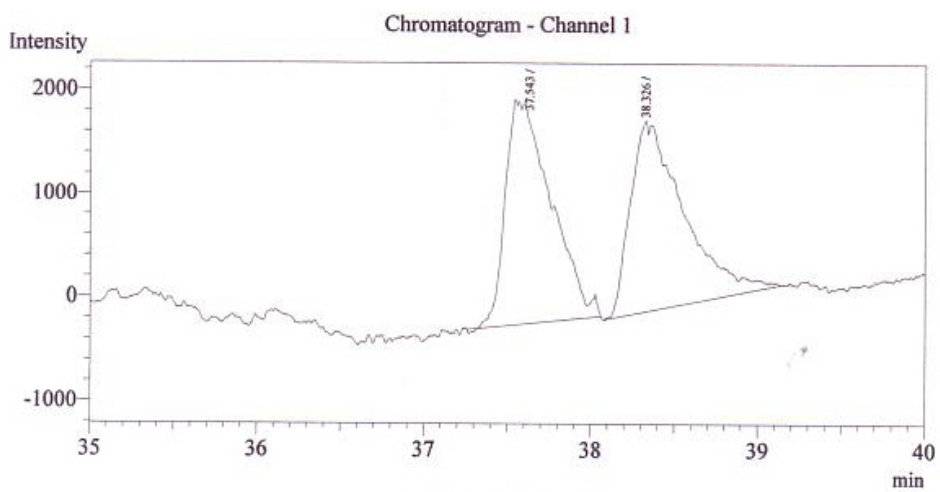

Peak Table - Channel 1

| Peak# | Ret.Time | Area  | Area%    | Height | Name | Conc. |
|-------|----------|-------|----------|--------|------|-------|
| 1     | 37.543   | 40807 | 50.1468  | 2171   |      | 0.000 |
| 2     | 38.326   | 40568 | 49.8532  | 1840   |      | 0.000 |
| Total |          | 81375 | 100.0000 | 4011   |      |       |

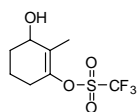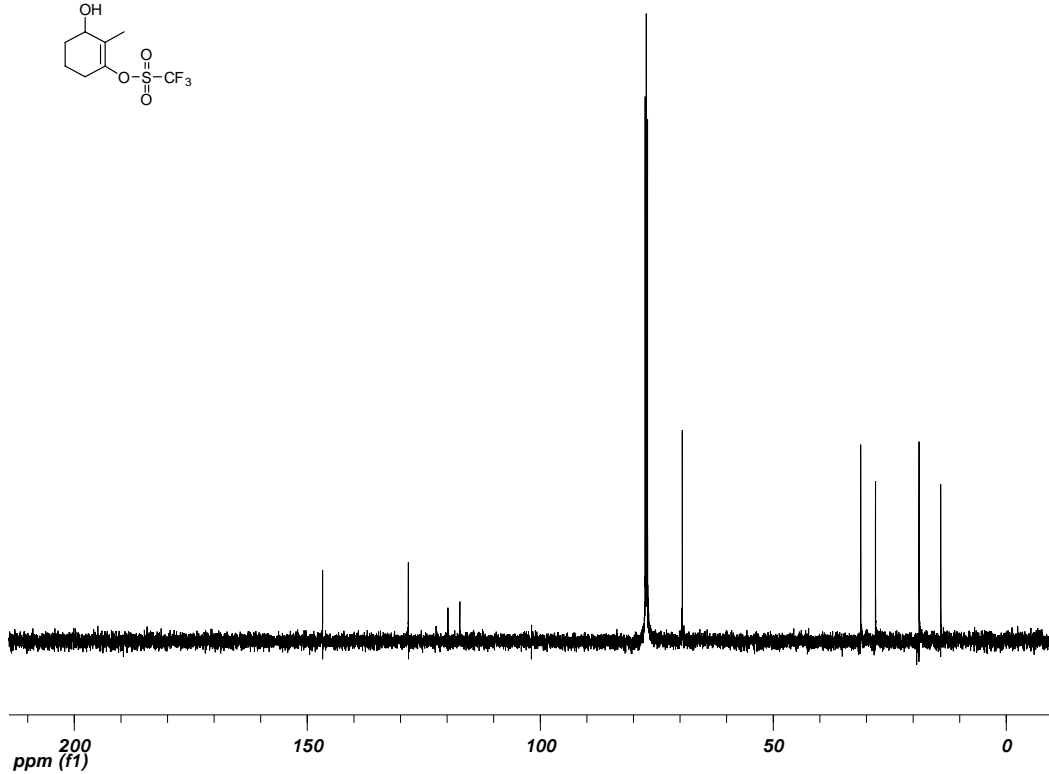

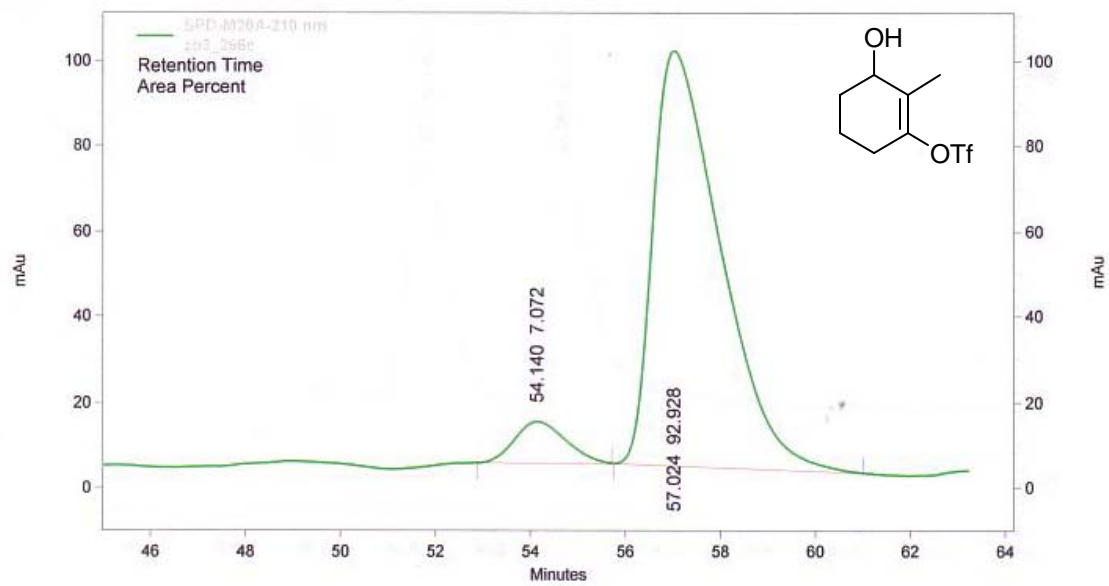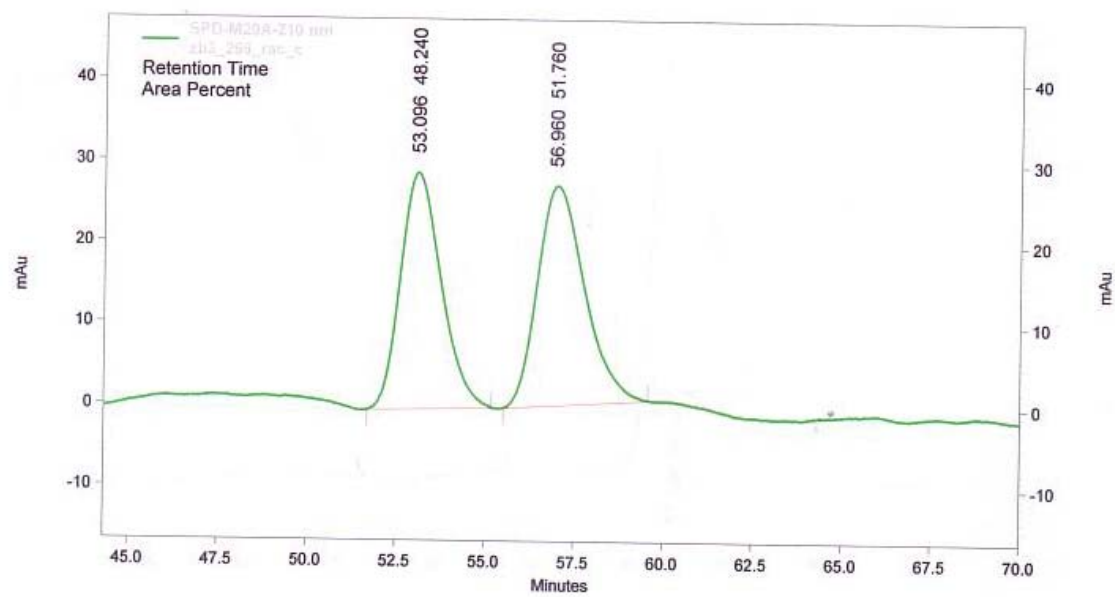

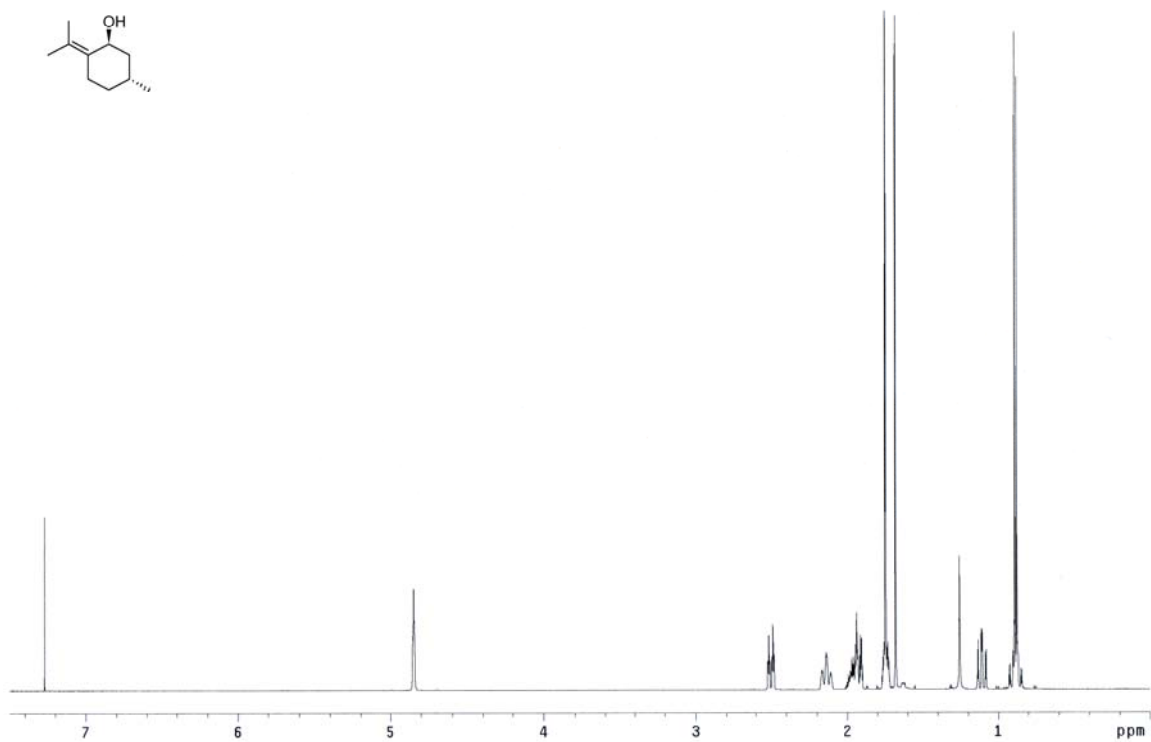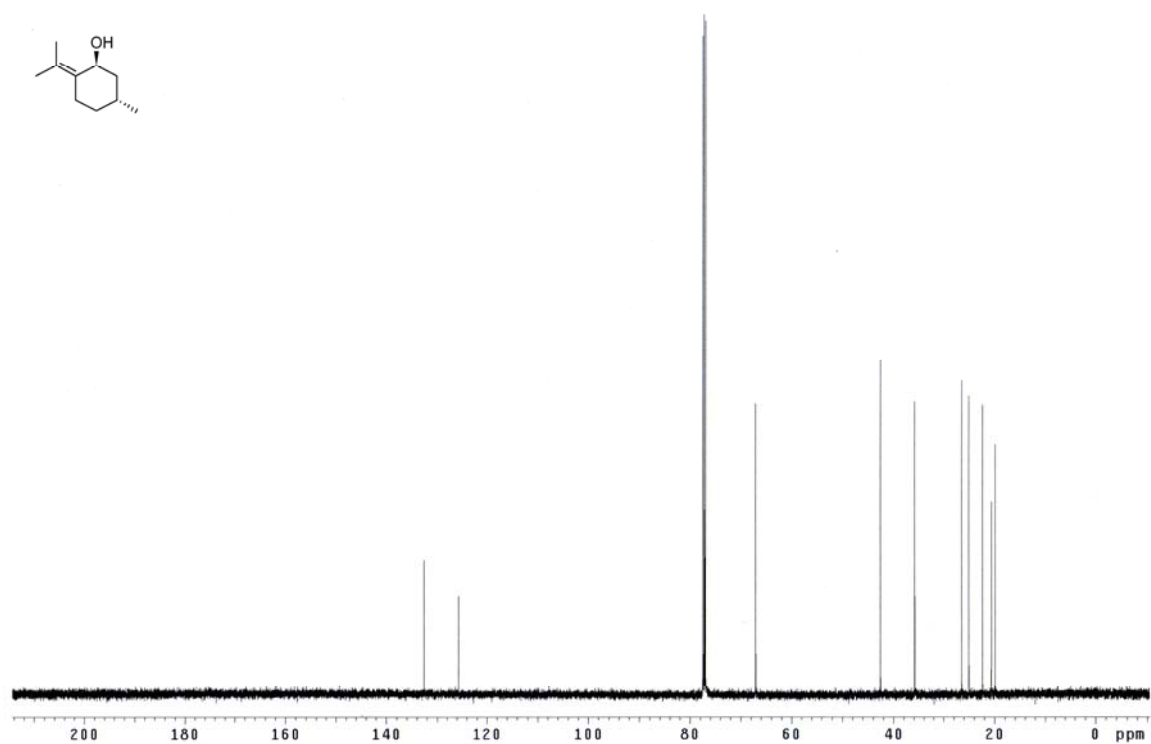

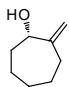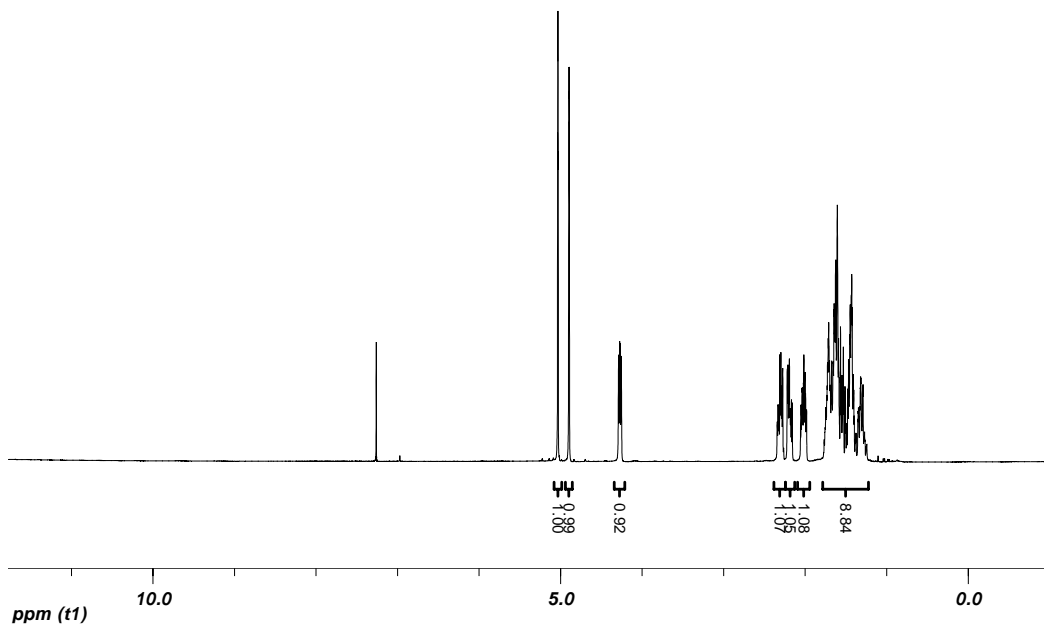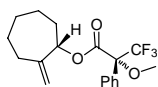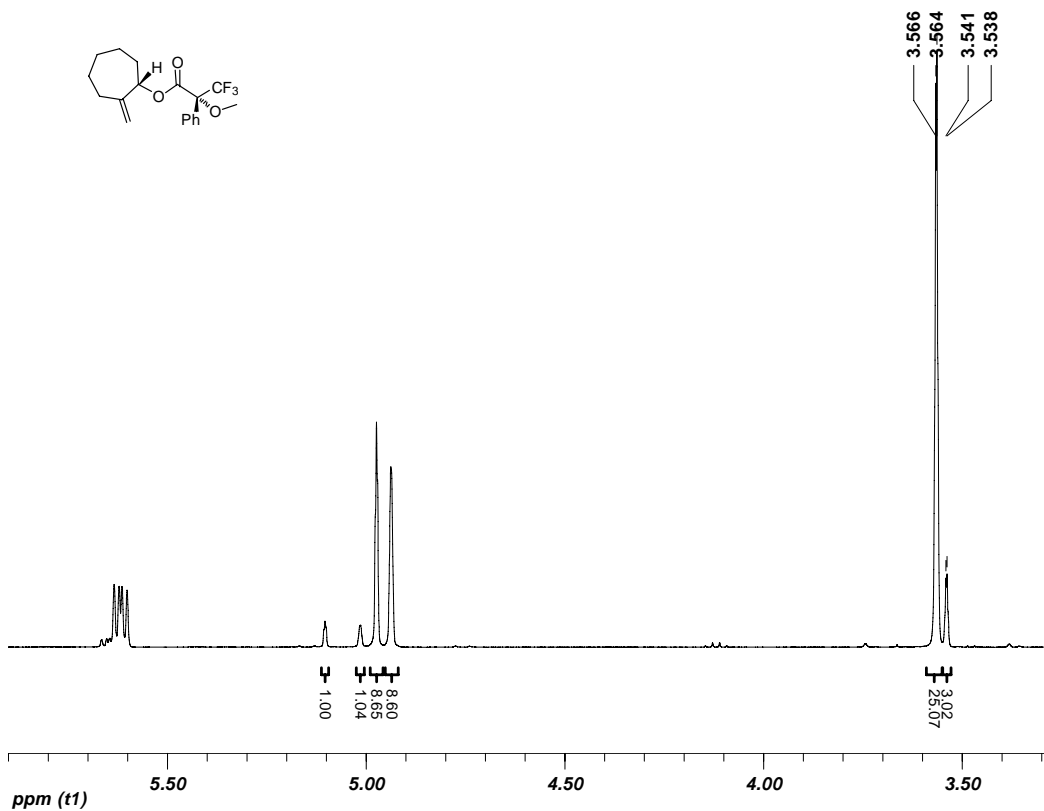

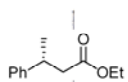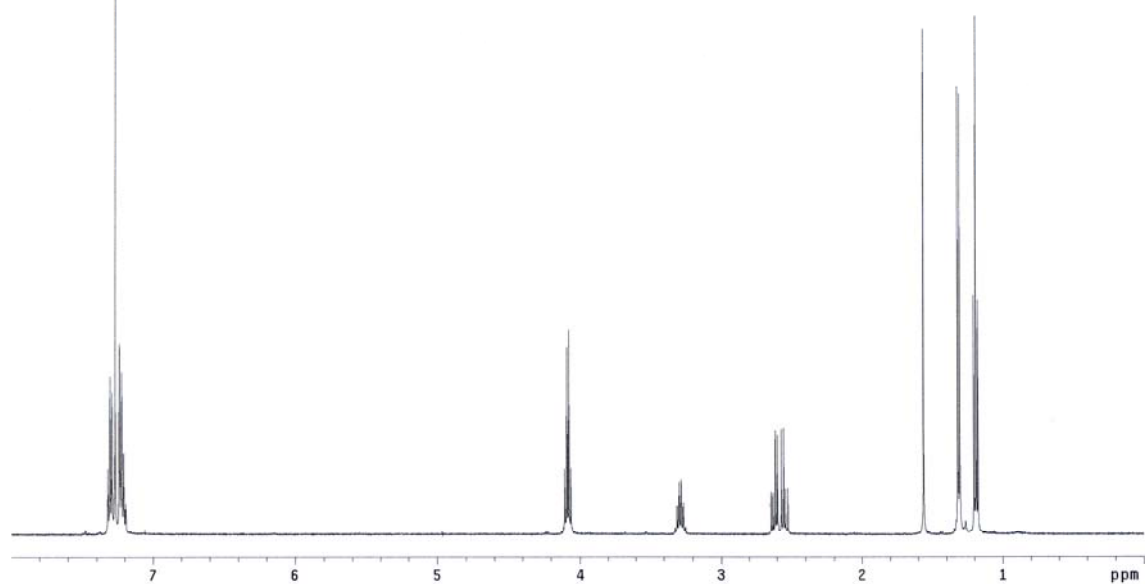

column: CHIRALCEL OB-H (serial OBH0CE-CE001), 0.46 x 25 cm  
 conditions: 1% IPA/hexanes, 1.0 mL/min

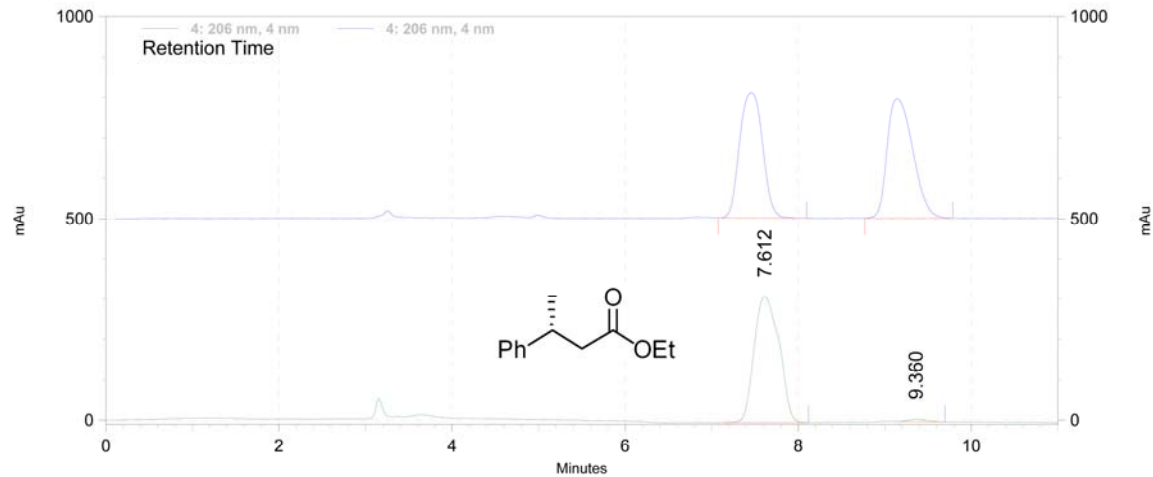

racemic mixture

**4: 206 nm, 4 nm Results**

| Retention Time | Area     | Area % |
|----------------|----------|--------|
| 7.356          | 18945590 | 48.45  |
| 9.044          | 20159350 | 51.55  |
| Totals         | 39104940 | 100.00 |

chiral experiment

**4: 206 nm, 4 nm Results**

| Retention Time | Area    | Area % |
|----------------|---------|--------|
| 7.612          | 5189630 | 98.64  |
| 9.360          | 71398   | 1.36   |
| Totals         | 5261028 | 100.00 |

RM921 CA1

97% ee
